# Supplementary material for: New variochelins from soil-isolated Variovorax sp. H002
Source: publisher site journal article supplement (doi:10.3762/bjoc.20.63), 2024-04-02
Supplement: Additional file 1 [file 1860-5397-20-63-S1.pdf]

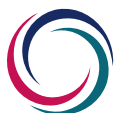

## Supporting Information

for

### **New variochelins from soil-isolated *Variovorax* sp. H002**

Jabal Rahmat Haedar, Aya Yoshimura and Toshiyuki Wakimoto

*Beilstein J. Org. Chem.* **2024**, *20*, 692–700. [doi:10.3762/bjoc.20.63](https://doi.org/10.3762/bjoc.20.63)

**Additional figures and tables, NMR and MS spectra**

## Table of contents

|                                                                                                                                         |     |
|-----------------------------------------------------------------------------------------------------------------------------------------|-----|
| Figure S1. Effect of various iron concentrations on variochelin B (2) production.....                                                   | S3  |
| Figure S2. ESIMS/MS spectrum of variochelin A (1).....                                                                                  | S4  |
| Figure S3. <sup>1</sup> H NMR spectrum of variochelin A (1) (500 MHz, DMSO- <i>d</i> <sub>6</sub> ).....                                | S5  |
| Figure S4. <sup>1</sup> H NMR spectrum of variochelin A (1) (500 MHz, methanol- <i>d</i> <sub>4</sub> ).....                            | S6  |
| Figure S5. <sup>13</sup> C NMR spectrum of variochelin A (1) (125 MHz, methanol- <i>d</i> <sub>4</sub> ).....                           | S7  |
| Figure S6. COSY spectrum of variochelin A (1) (500 MHz, methanol- <i>d</i> <sub>4</sub> ).....                                          | S8  |
| Figure S7. HSQC spectrum of variochelin A (1) (500 MHz, methanol- <i>d</i> <sub>4</sub> ).....                                          | S9  |
| Figure S8. HMBC spectrum of variochelin A (1) (500 MHz, methanol- <i>d</i> <sub>4</sub> ).....                                          | S10 |
| Figure S9. EIMS of dodecanoic acid methyl ester in variochelin A (1).....                                                               | S11 |
| Figure S10. ESIMS/MS spectrum of variochelin B (2).....                                                                                 | S12 |
| Figure S11. <sup>1</sup> H NMR spectrum of variochelin B (2) (500 MHz, DMSO- <i>d</i> <sub>6</sub> ).....                               | S13 |
| Figure S12. <sup>1</sup> H NMR spectrum of variochelin B (2) (500 MHz, methanol- <i>d</i> <sub>4</sub> ).....                           | S14 |
| Figure S13. <sup>13</sup> C NMR spectrum of variochelin B (2) (125 MHz, methanol- <i>d</i> <sub>4</sub> ).....                          | S15 |
| Figure S14. COSY spectrum of variochelin B (2) (500 MHz, methanol- <i>d</i> <sub>4</sub> ).....                                         | S16 |
| Figure S15. HSQC spectrum of variochelin B (2) (500 MHz, methanol- <i>d</i> <sub>4</sub> ).....                                         | S17 |
| Figure S16. HMBC spectrum of variochelin B (2) (500 MHz, methanol- <i>d</i> <sub>4</sub> ).....                                         | S18 |
| Figure S17. EIMS of tetradecanoic acid methyl ester in variochelin B (2).....                                                           | S19 |
| Figure S18. ESIMS/MS spectrum of variochelin C (3).....                                                                                 | S20 |
| Figure S19. <sup>1</sup> H NMR spectrum of variochelin C (3) (500 MHz, DMSO- <i>d</i> <sub>6</sub> ).....                               | S21 |
| Figure S20. <sup>1</sup> H NMR spectrum of variochelin C (3) (500 MHz, methanol- <i>d</i> <sub>4</sub> ).....                           | S22 |
| Figure S21. <sup>13</sup> C NMR spectrum of variochelin C (3) (125 MHz, methanol- <i>d</i> <sub>4</sub> ).....                          | S23 |
| Figure S22. COSY spectrum of variochelin C (3) (500 MHz, methanol- <i>d</i> <sub>4</sub> ).....                                         | S24 |
| Figure S23. HSQC spectrum of variochelin C (3) (500 MHz, methanol- <i>d</i> <sub>4</sub> ).....                                         | S25 |
| Figure S24. HMBC spectrum of variochelin C (3) (500 MHz, methanol- <i>d</i> <sub>4</sub> ).....                                         | S26 |
| Figure S25. Marfey's analysis of variochelin C (3).....                                                                                 | S27 |
| Figure S26. ESIMS/MS spectrum of variochelin D (4).....                                                                                 | S28 |
| Figure S27. <sup>1</sup> H NMR spectrum of variochelin D (4) (500 MHz, DMSO- <i>d</i> <sub>6</sub> ).....                               | S29 |
| Figure S28. <sup>1</sup> H NMR spectrum of variochelin D (4) (500 MHz, methanol- <i>d</i> <sub>4</sub> ).....                           | S30 |
| Figure S29. <sup>13</sup> C NMR spectrum of variochelin D (4) (125 MHz, methanol- <i>d</i> <sub>4</sub> ).....                          | S31 |
| Figure S30. COSY spectrum of variochelin D (4) (500 MHz, methanol- <i>d</i> <sub>4</sub> ).....                                         | S32 |
| Figure S31. HSQC spectrum of variochelin D (4) (500 MHz, methanol- <i>d</i> <sub>4</sub> ).....                                         | S33 |
| Figure S32. HMBC spectrum of variochelin D (4) (500 MHz, methanol- <i>d</i> <sub>4</sub> ).....                                         | S34 |
| Figure S33. Marfey's analysis of variochelin D (4).....                                                                                 | S35 |
| Figure S34. ESIMS/MS spectrum of variochelin E (5).....                                                                                 | S36 |
| Figure S35. <sup>1</sup> H NMR spectrum of variochelin E (5) (500 MHz, methanol- <i>d</i> <sub>4</sub> ).....                           | S37 |
| Figure S36. <sup>1</sup> H NMR spectrum of variochelin E (5) (500 MHz, DMSO- <i>d</i> <sub>6</sub> ).....                               | S38 |
| Figure S37. <sup>13</sup> C NMR spectrum of variochelin E (5) (125 MHz, methanol- <i>d</i> <sub>4</sub> ).....                          | S39 |
| Figure S38. COSY spectrum of variochelin E (5) (500 MHz, methanol- <i>d</i> <sub>4</sub> ).....                                         | S40 |
| Figure S39. HSQC spectrum of variochelin E (5) (500 MHz, methanol- <i>d</i> <sub>4</sub> ).....                                         | S41 |
| Figure S40. HMBC spectrum of variochelin E (5) (500 MHz, methanol- <i>d</i> <sub>4</sub> ).....                                         | S42 |
| Figure S41. Marfey's analysis of variochelin E (5).....                                                                                 | S43 |
| Figure S42. Comparison of Variochelin BGCs identified in<br><i>Variovorax boronicumulans</i> BAM-48 and <i>Variovorax</i> sp. H002..... | S44 |

|                                                                                                                                                        |     |
|--------------------------------------------------------------------------------------------------------------------------------------------------------|-----|
| Figure S43. Validation of <i>var</i> biosynthetic gene cluster in <i>Variovorax</i> sp. H002 .....                                                     | S45 |
| Figure S44. Extracted ion chromatogram showing deletion of <i>varG</i> abolishes variochelin A–E (1–5) production in <i>Variovorax</i> sp. H002. ....  | S46 |
| Figure S45. Selected COSY and HMBC correlations of variochelin A–E (1–5) in methanol- <i>d</i> <sub>4</sub> .....                                      | S47 |
| Table S1. <sup>1</sup> H (500 MHz) and <sup>13</sup> C (125 MHz) NMR data of variochelins A–E (1–5) in methanol- <i>d</i> <sub>4</sub> (δ in ppm)..... | S48 |
| Table S2. Primers, strains and plasmids used in this study.....                                                                                        | S52 |
| Table S3. Annotation of <i>var</i> biosynthetic gene cluster in <i>Variovorax</i> sp. H002 .....                                                       | S53 |

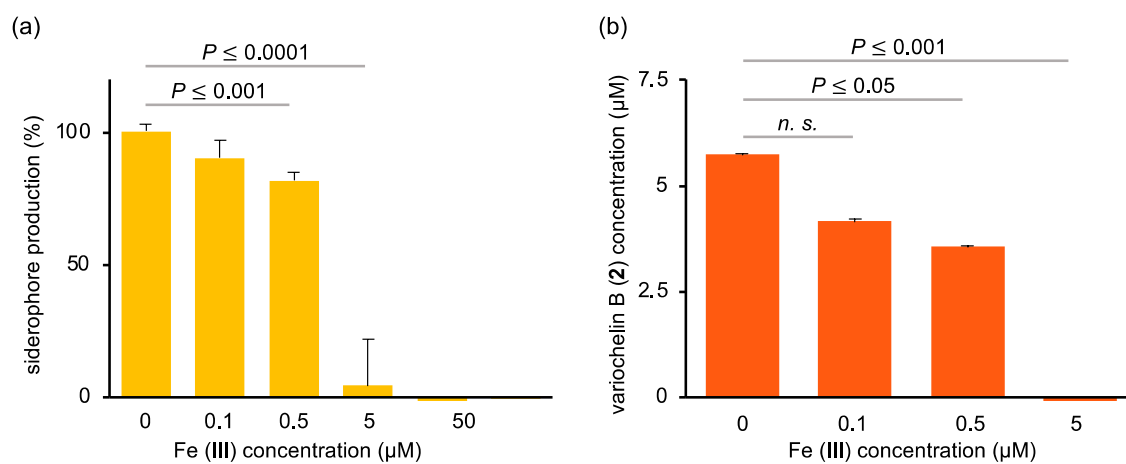

**Figure S1.** The effect of various iron concentrations on (a) total siderophore production indicated by CAS assay activity ( $n = 3$ ), and (b) production of variochelin B (2) indicated by calculation of total area under curve ( $n = 3$ ).

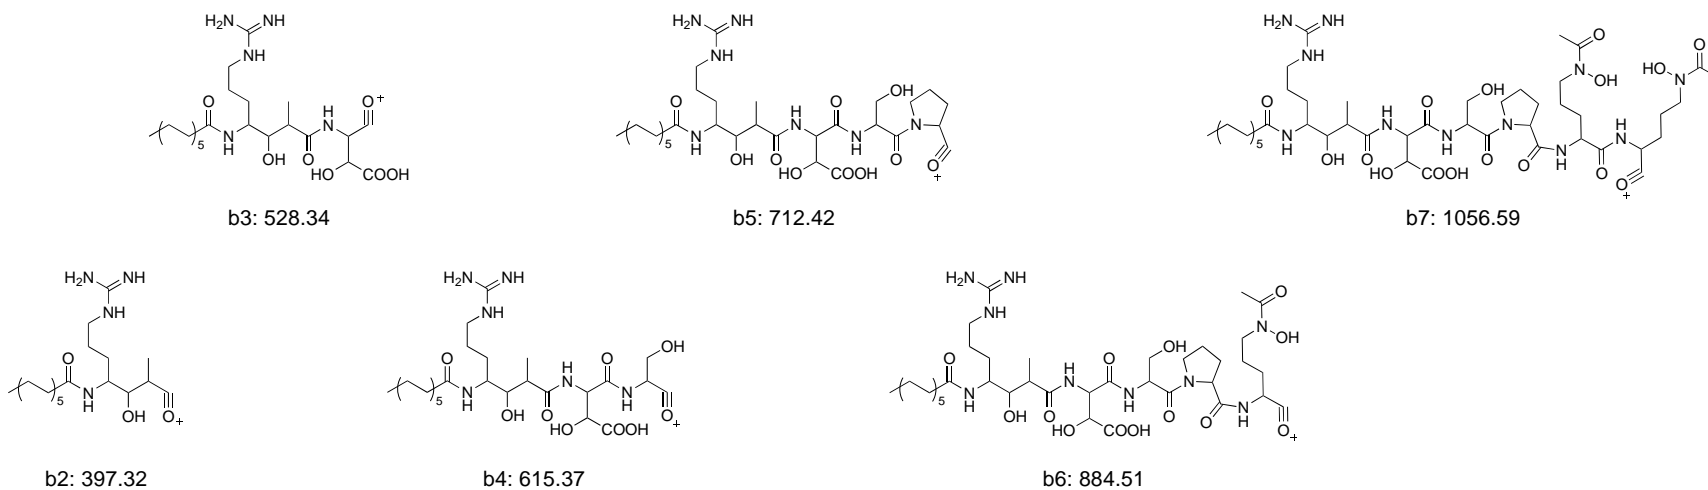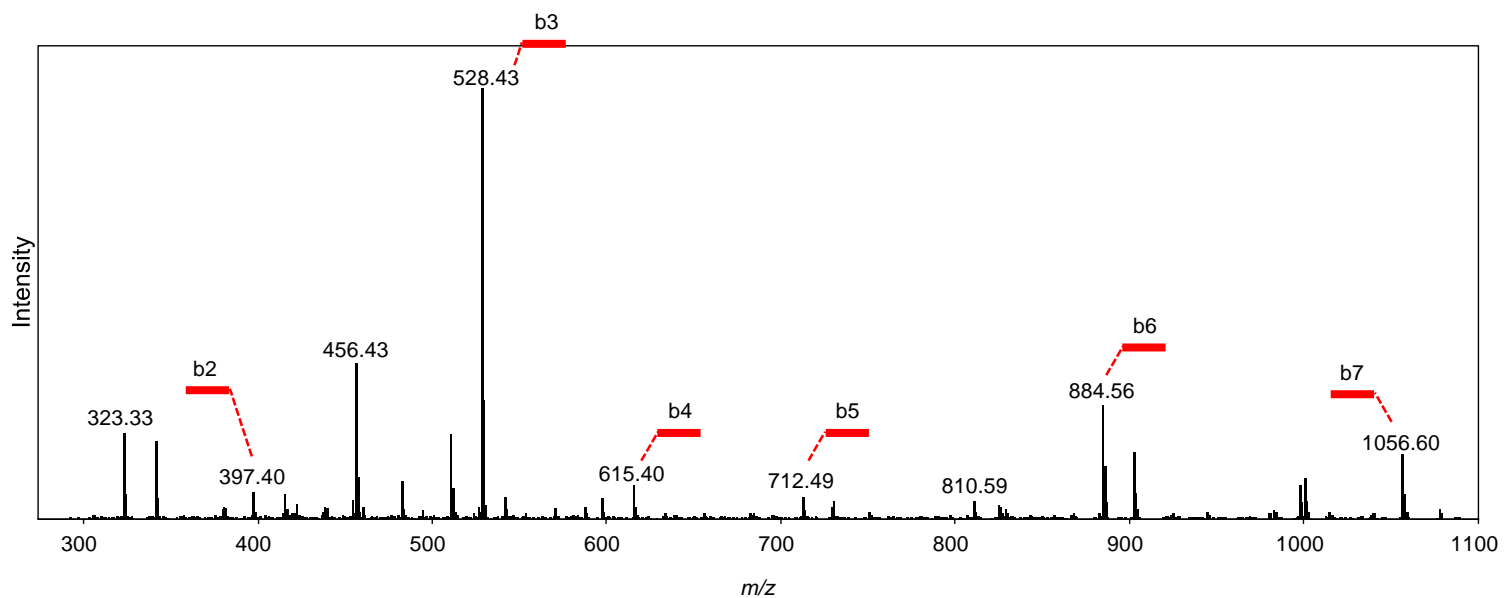

**Figure S2.** ESIMS/MS analysis of variochelin A (**1**). Structures and  $m/z$  of predicted fragmentation ions were described the top. An ion peak of  $[M + H]^+$  at  $m/z$  1075.08 was chosen as a parent ion.

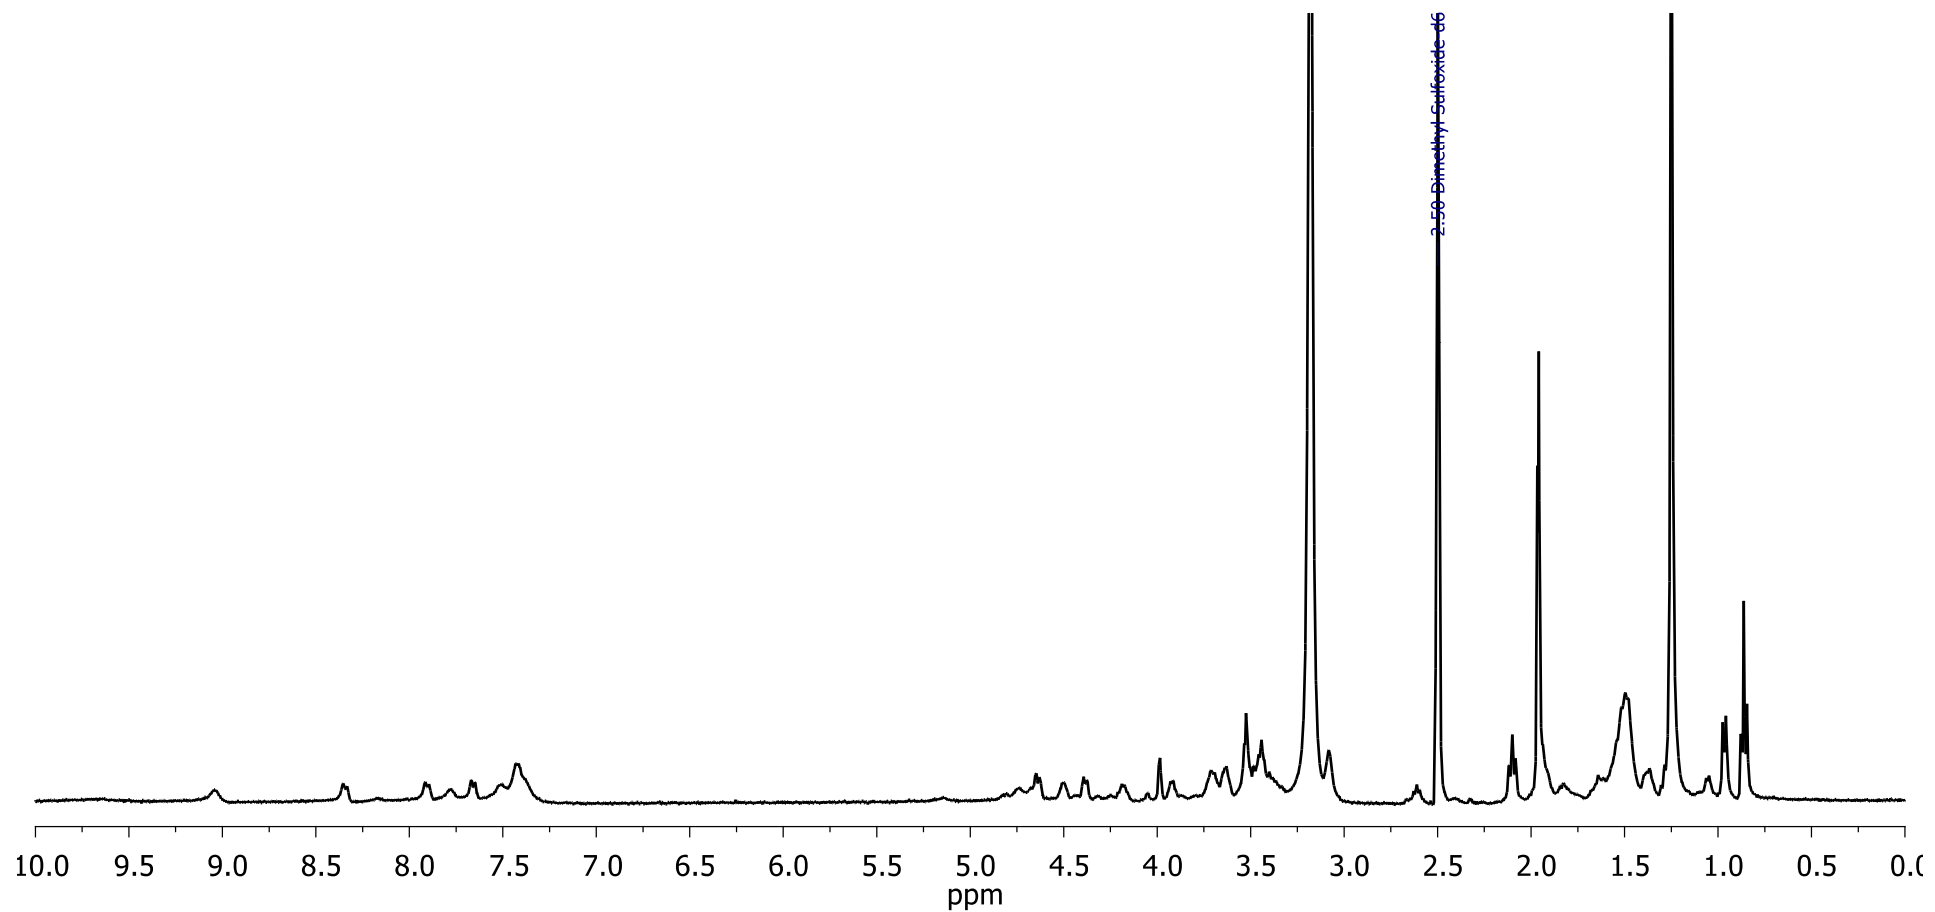

**Figure S3.**  $^1\text{H}$  NMR spectrum of variochelin A (**1**) (500 MHz,  $\text{DMSO-}d_6$ ).

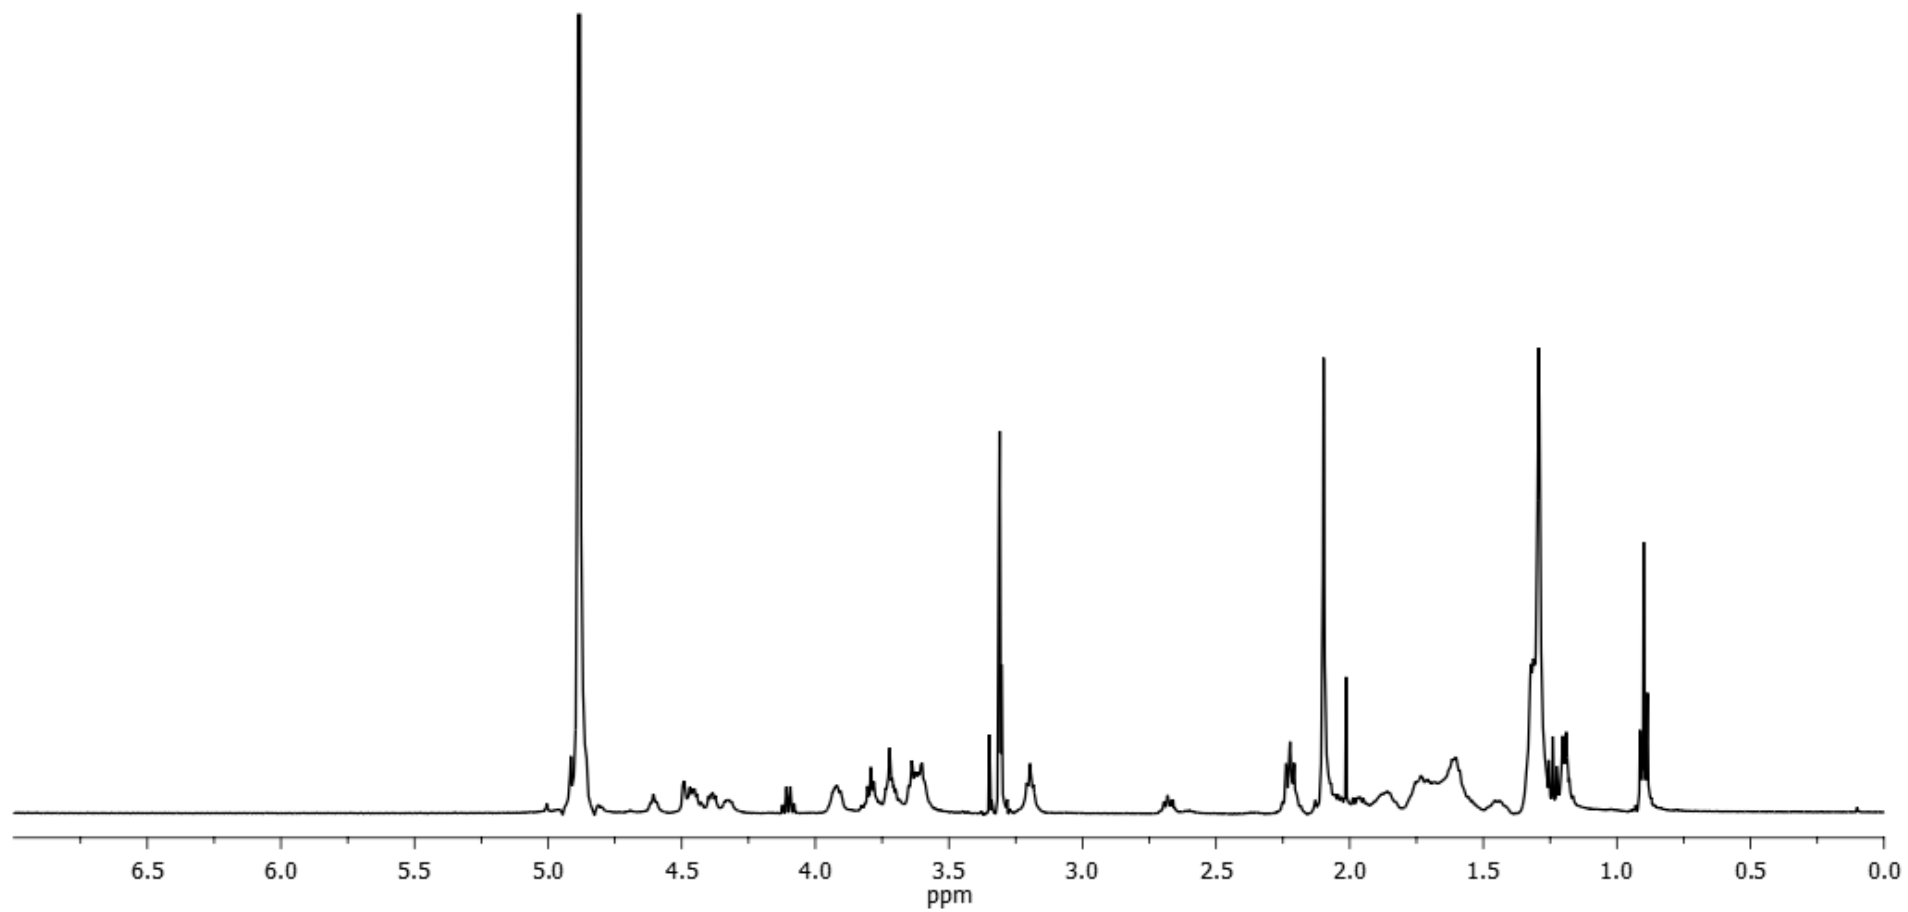

**Figure S4.**  $^1\text{H}$  NMR spectrum of variochelin A (**1**) (500 MHz, methanol- $d_4$ ).

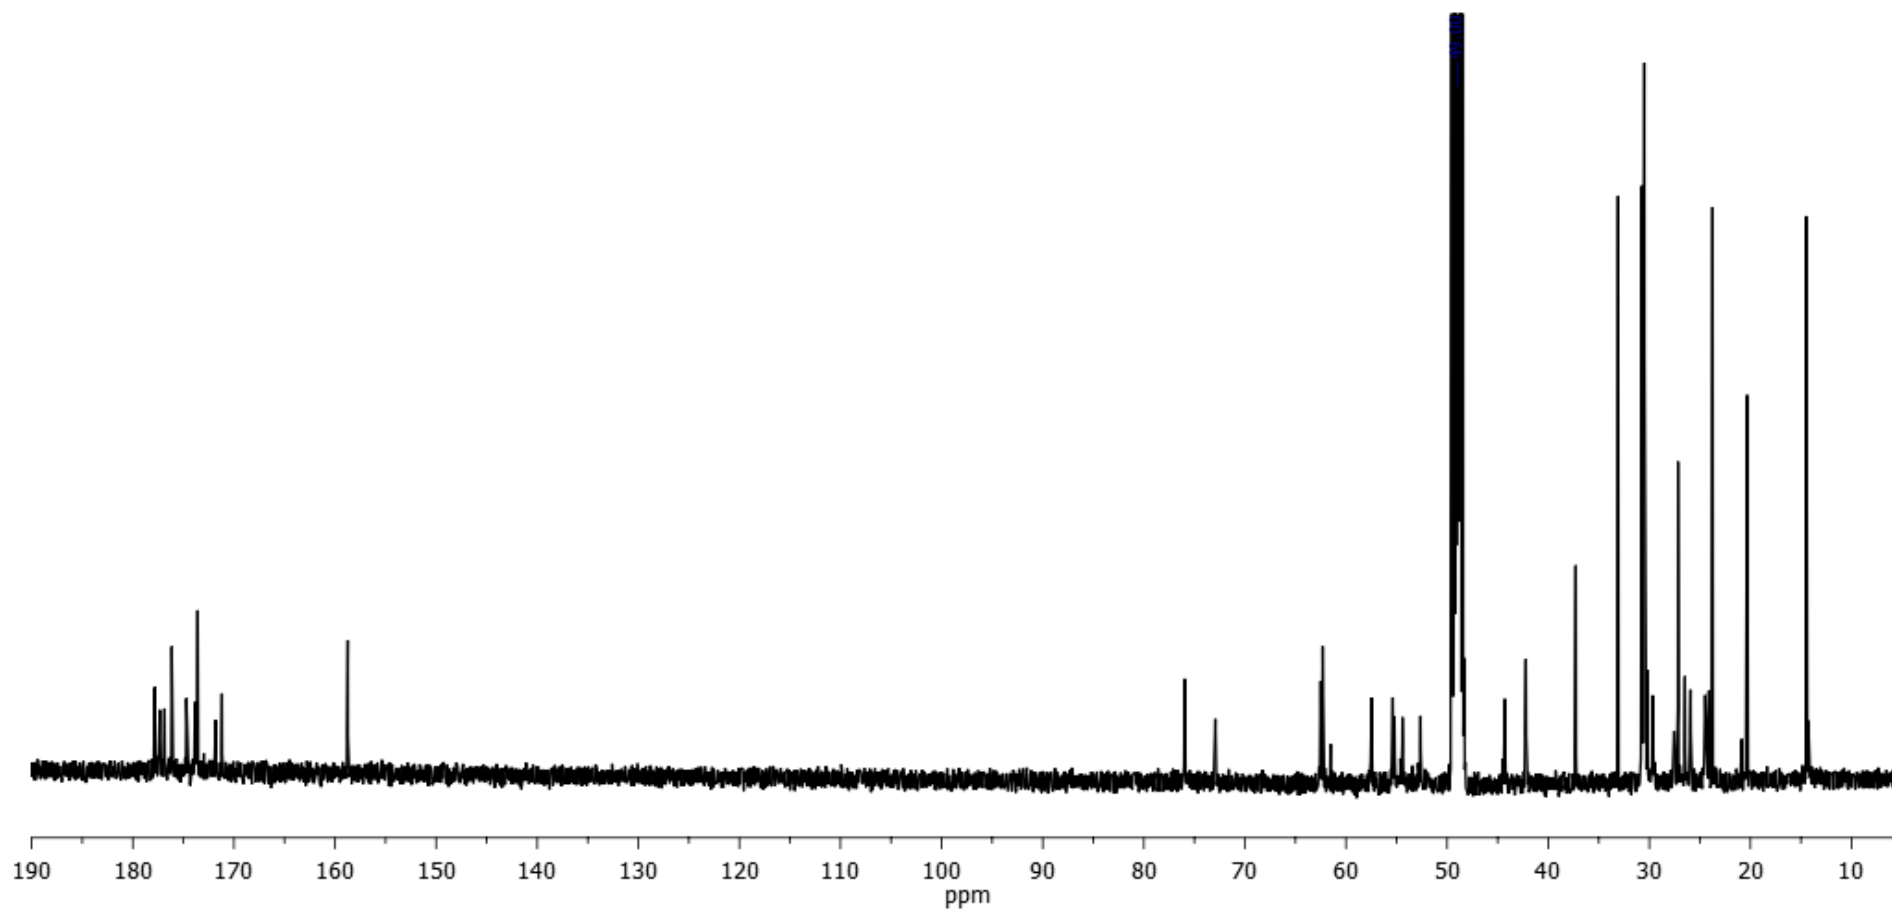

**Figure S5.**  $^{13}\text{C}$  NMR spectrum of variochelin A (**1**) (125 MHz,  $\text{methanol-}d_4$ ).



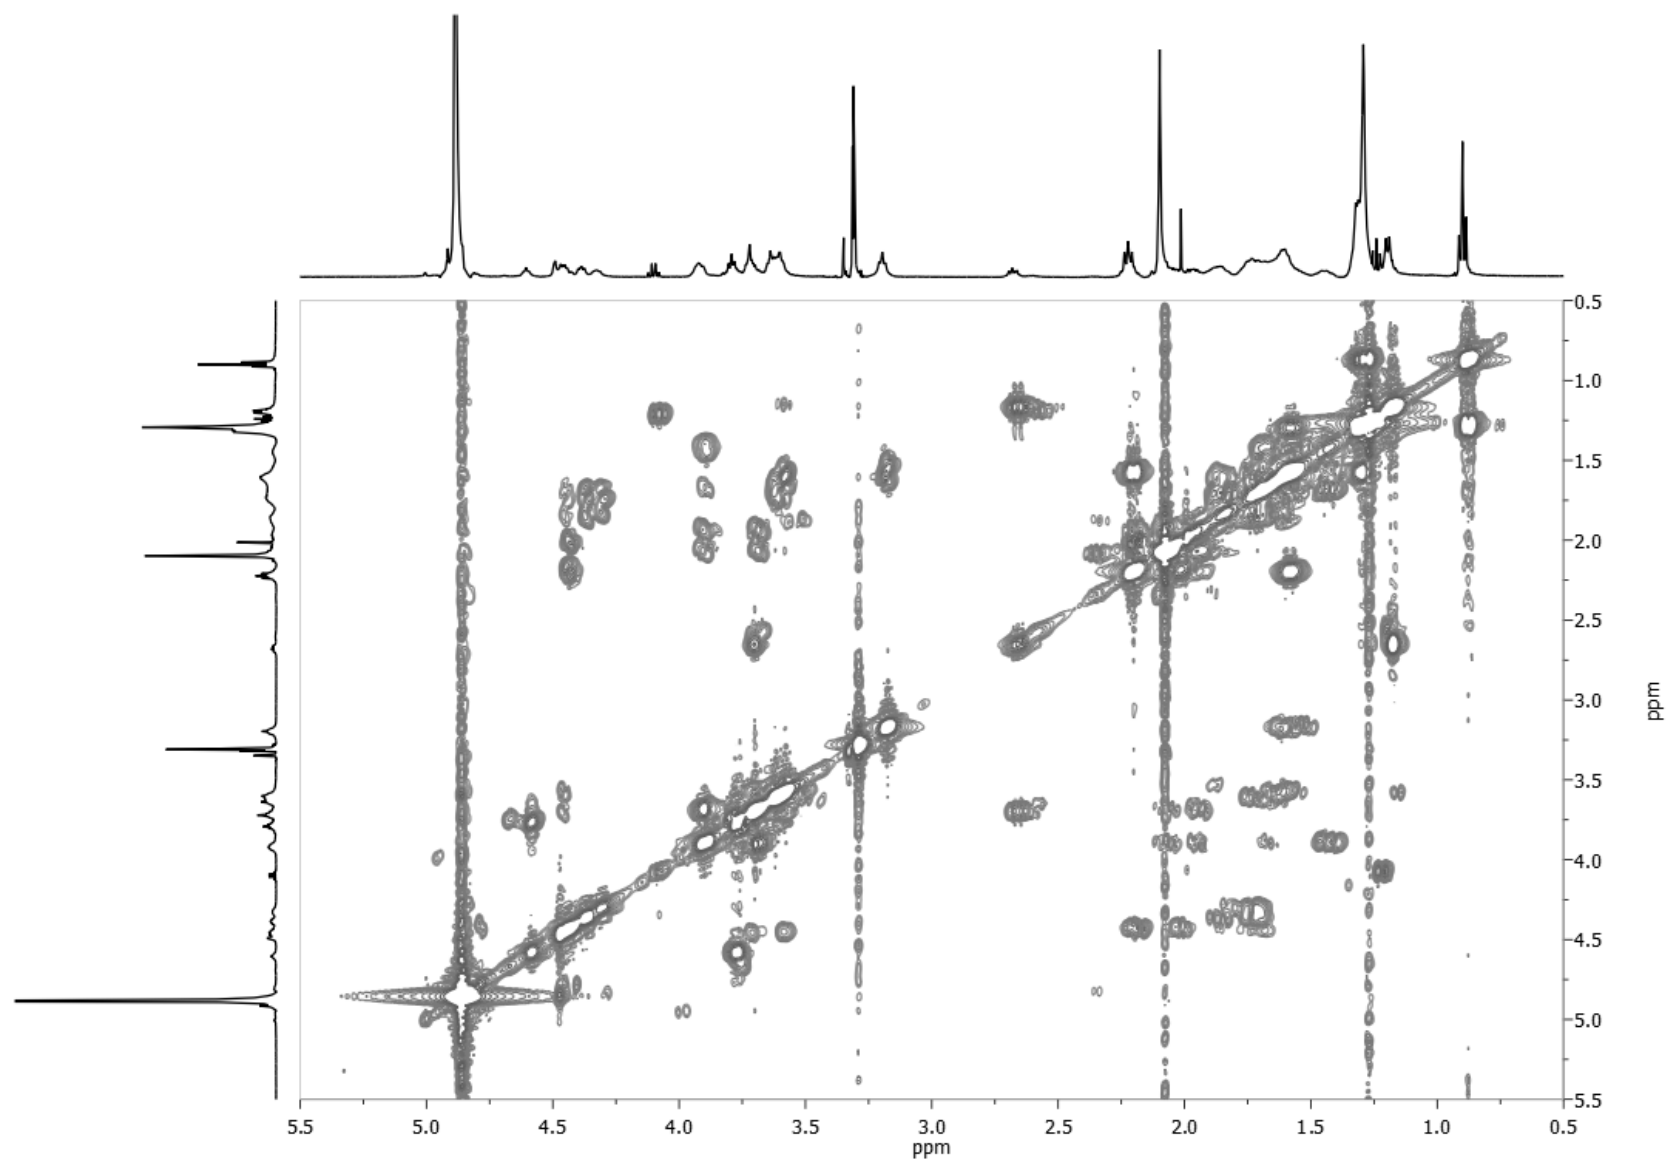

**Figure S6.** COSY spectrum of variochelin A (**1**) (500 MHz, methanol- $d_4$ ).

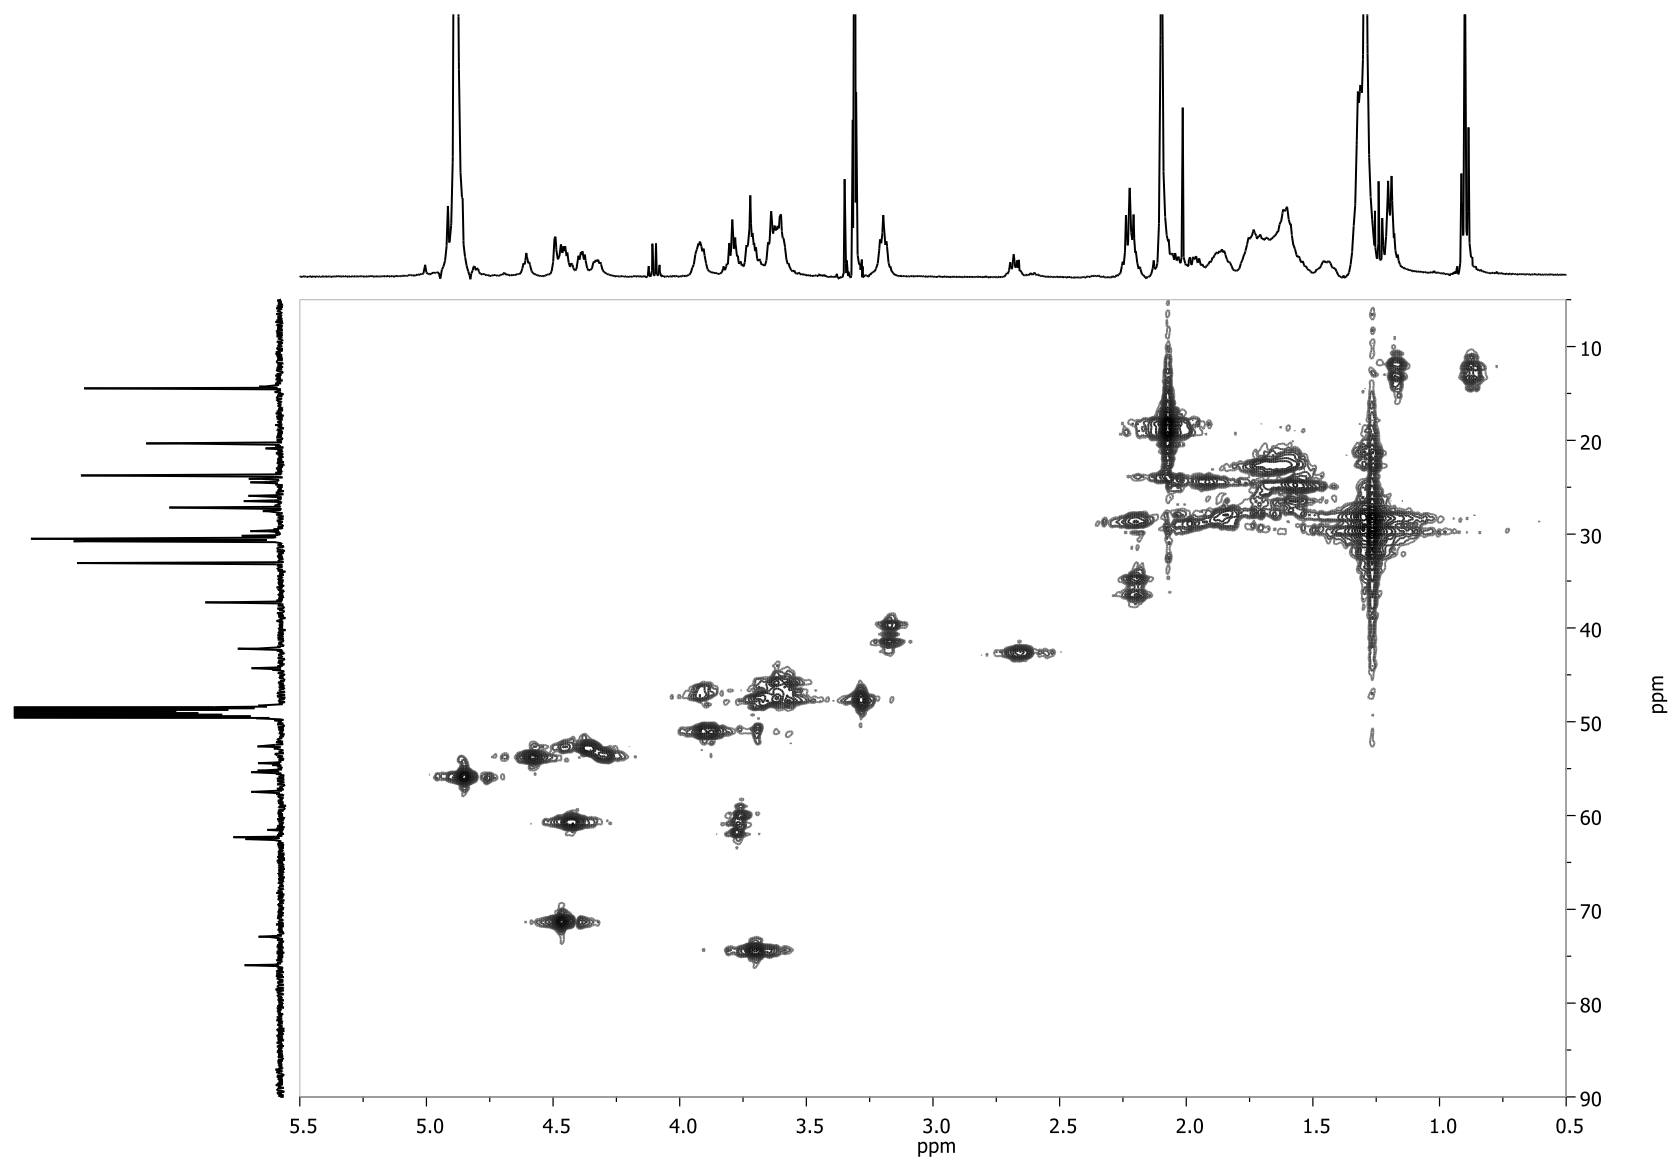

**Figure S7.** HSQC spectrum of variochelin A (**1**) (500 MHz, methanol- $d_4$ ).

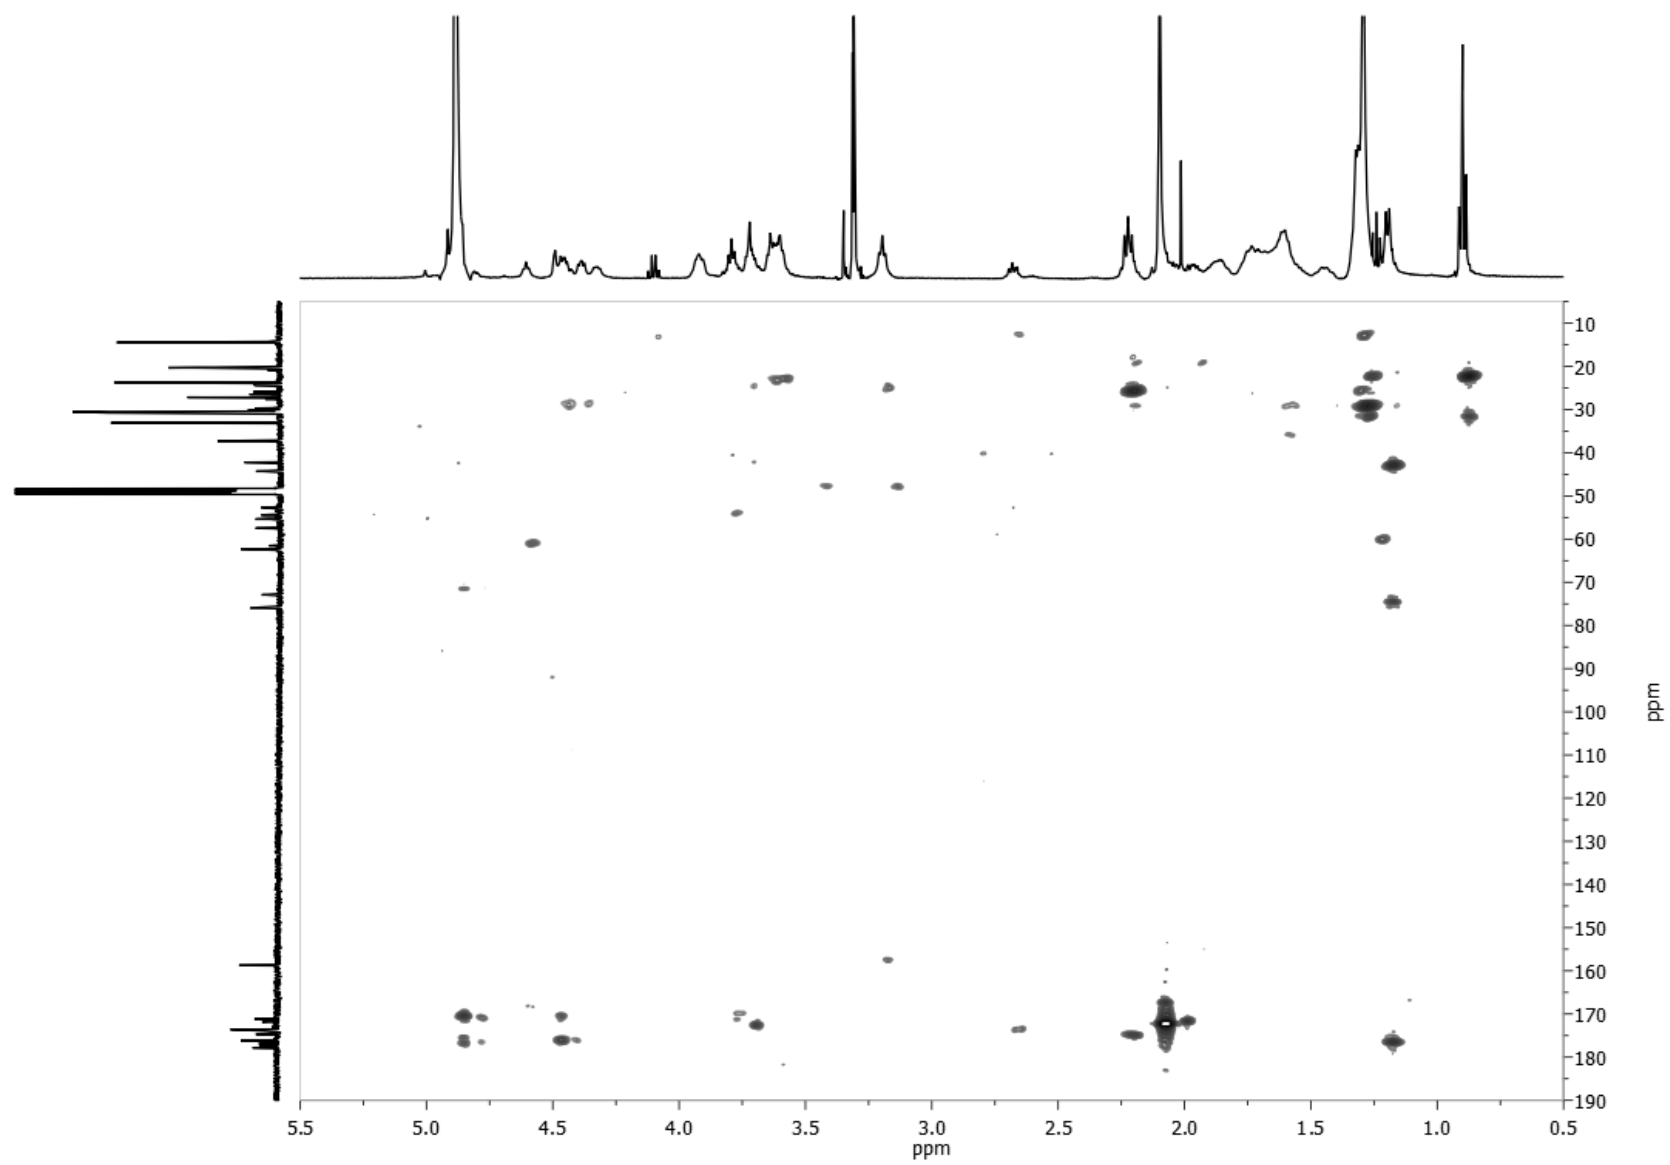

**Figure S8.** HMBC spectrum of variochelin A (**1**) (500 MHz, methanol- $d_4$ ).

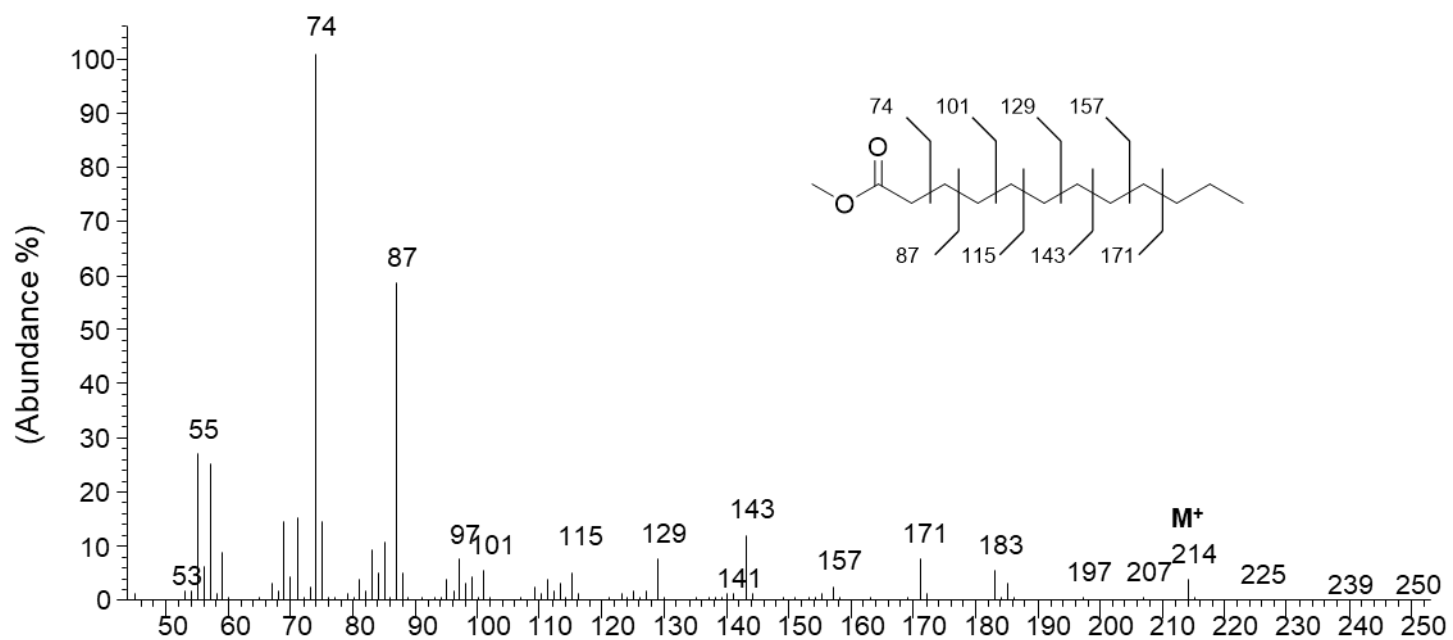

**Figure S9.** EIMS of dodecanoic acid methyl ester in variochelin A (**1**).

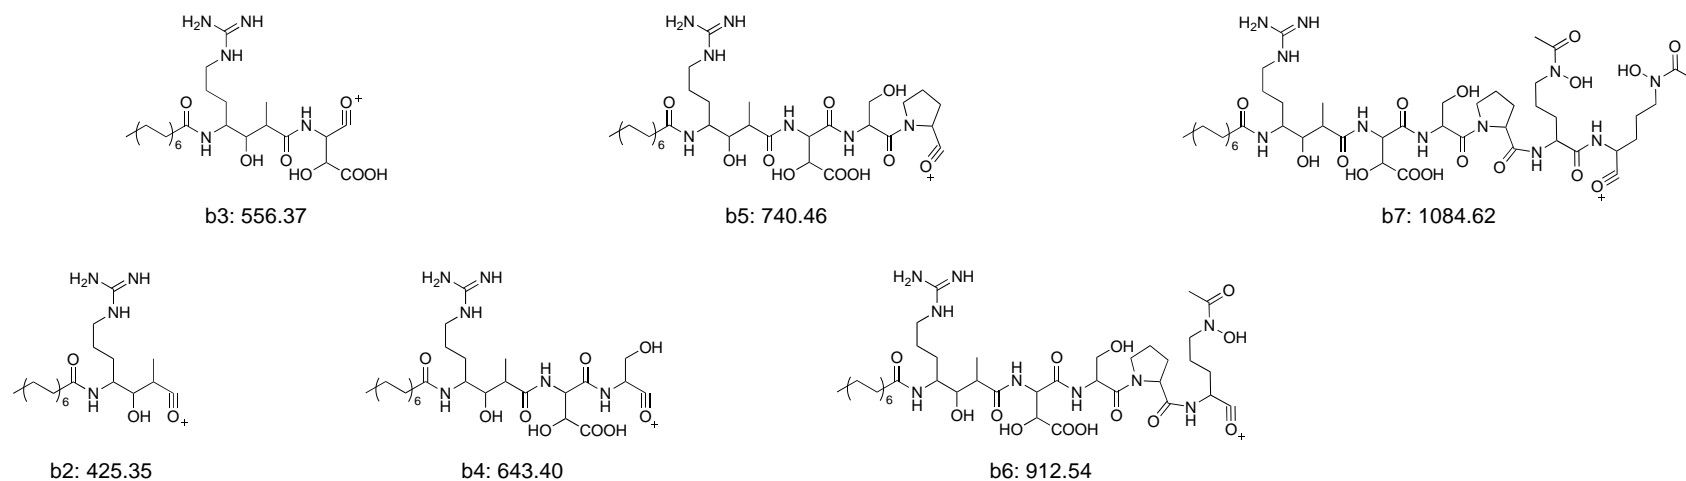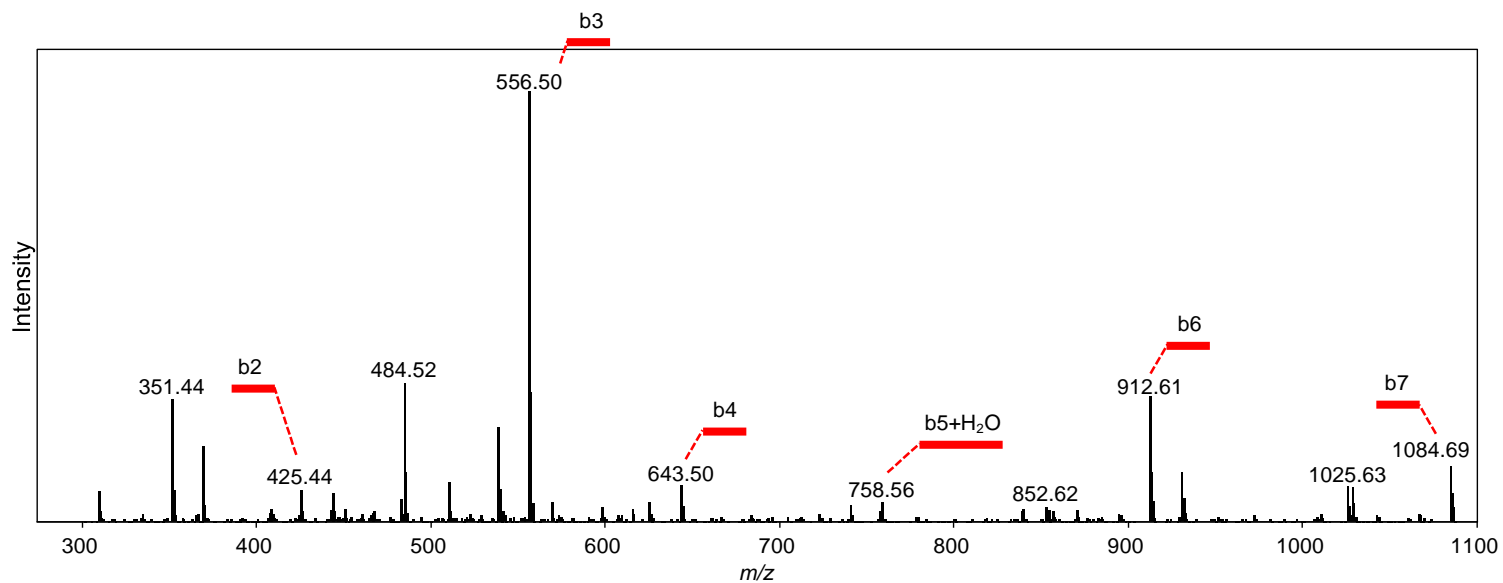

**Figure S10.** ESIMS/MS analysis of variochelin B (**2**). Structures and  $m/z$  of predicted fragmentation ions were described the top. An ion peak of  $[M + H]^+$  at  $m/z$  1103.18 was chosen as a parent ion.

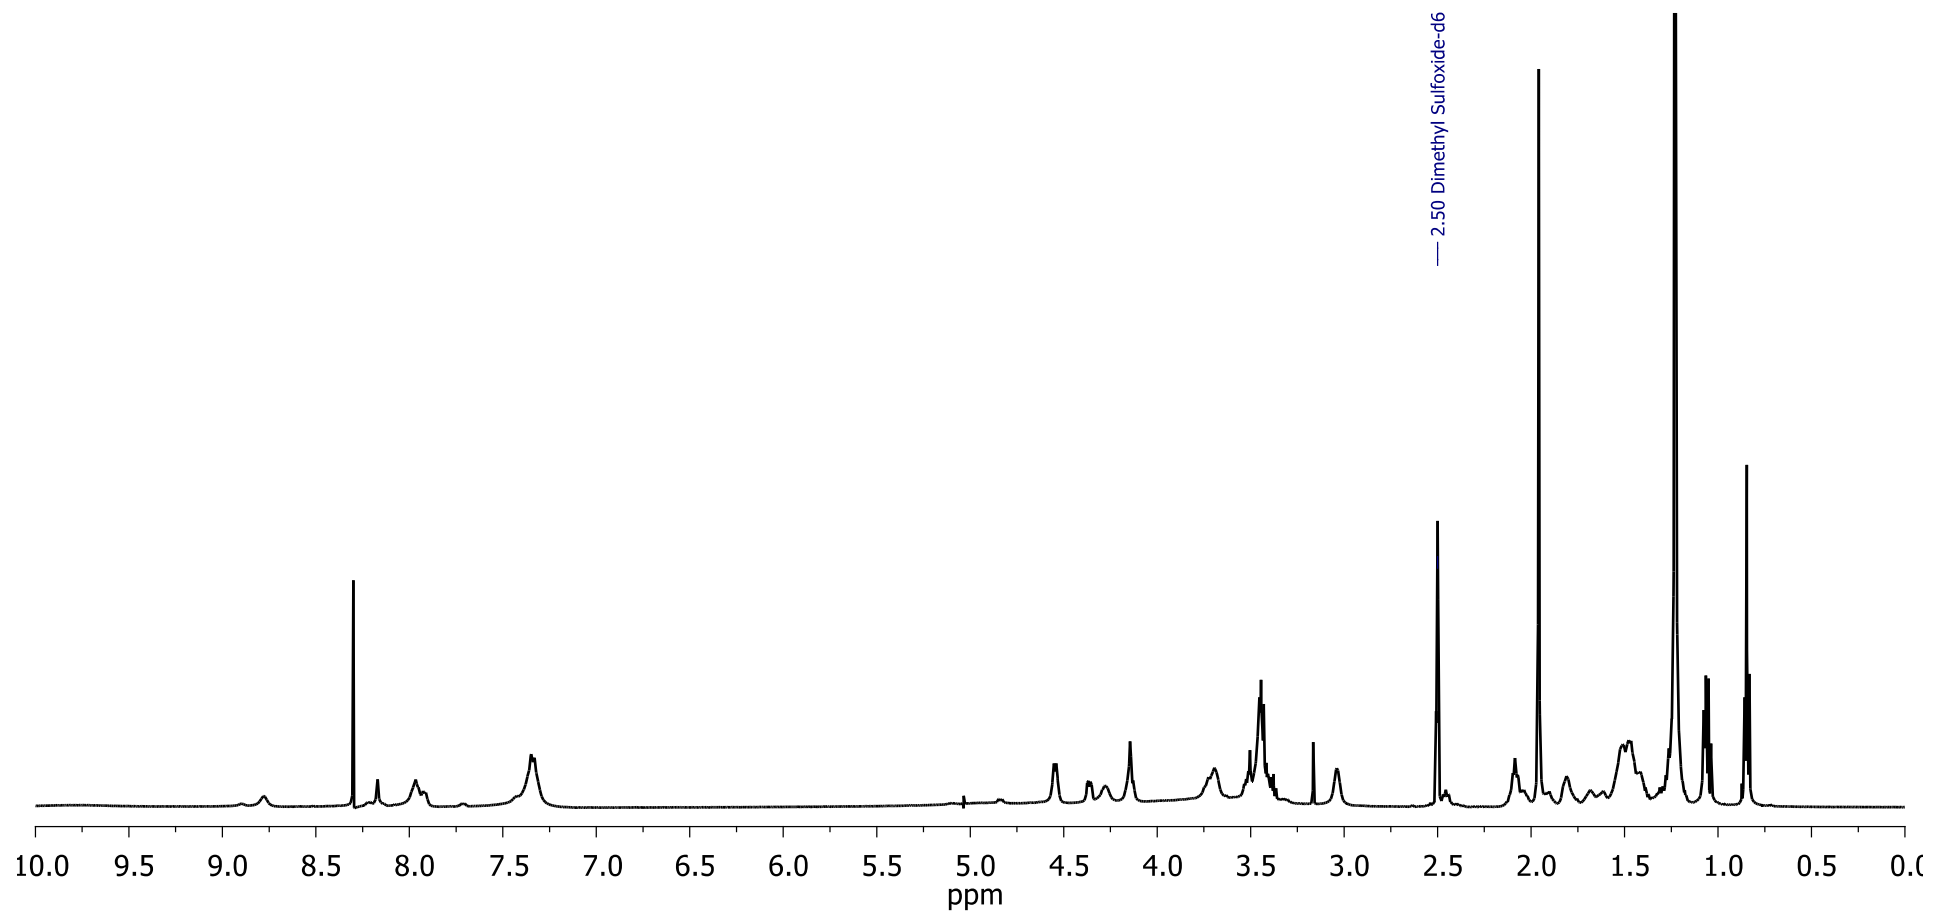

**Figure S11.**  $^1\text{H}$  NMR spectrum of variochelin B (2) (500 MHz,  $\text{DMSO-}d_6$ ).

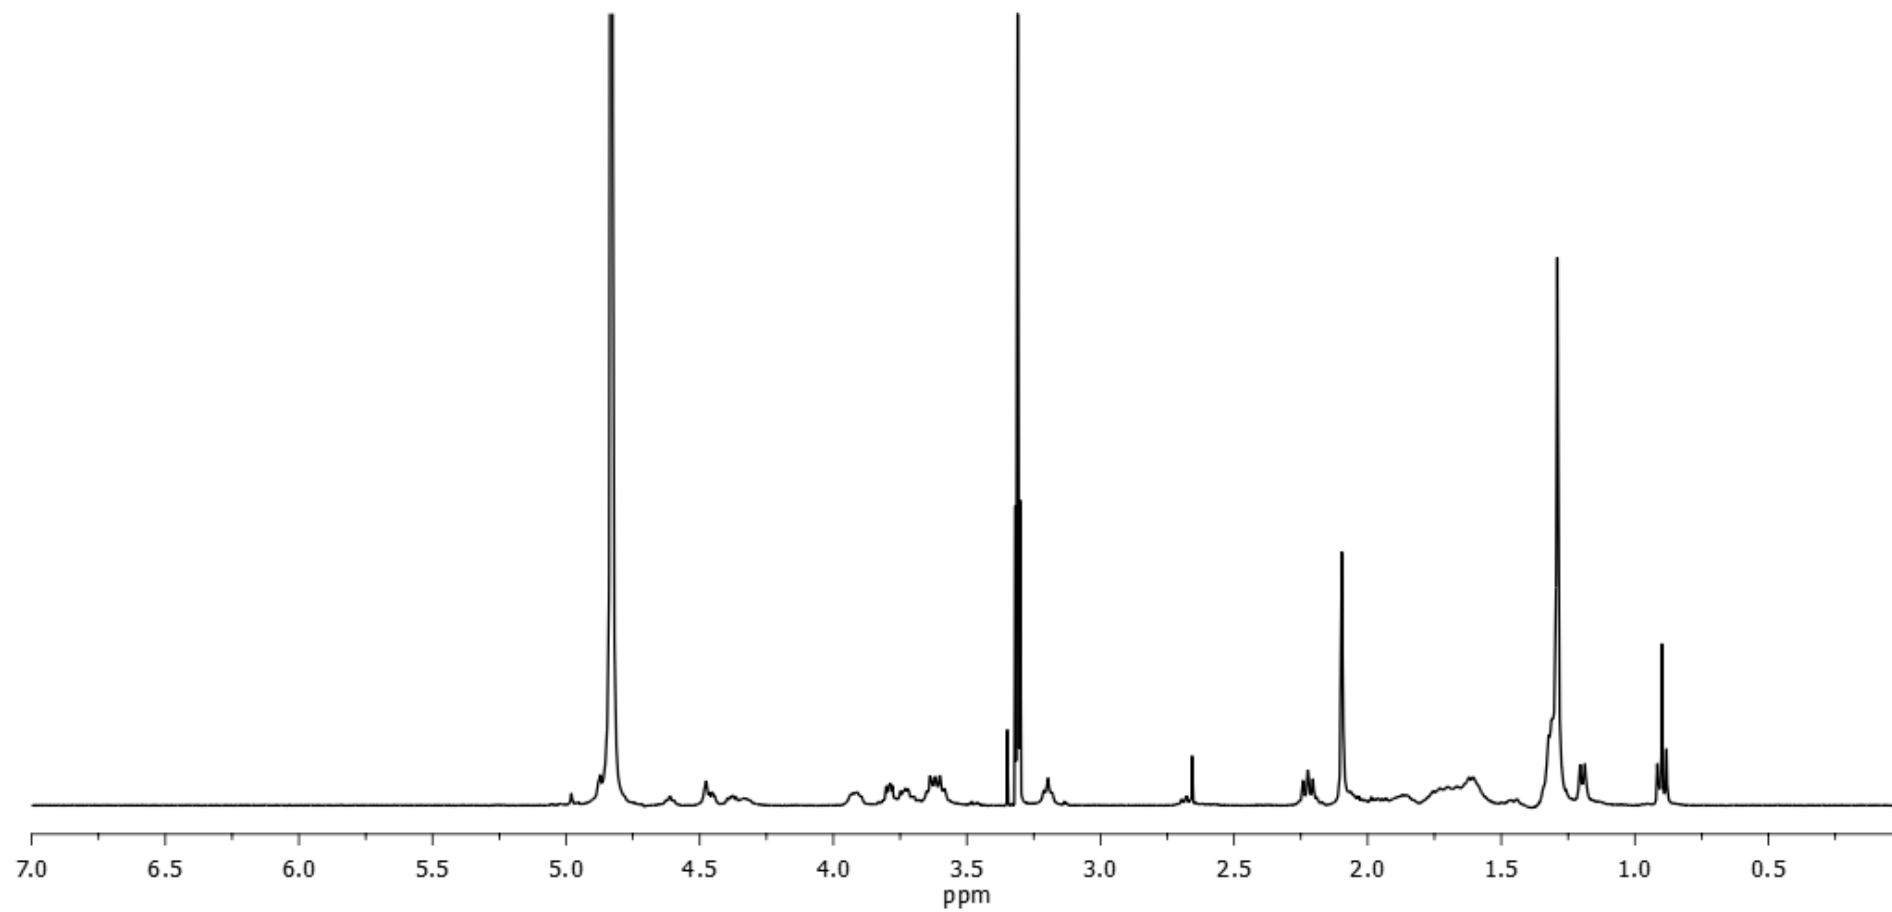

**Figure S12.**  $^1\text{H}$  NMR spectrum of variochelin B (**2**). (500 MHz, methanol- $d_4$ ).

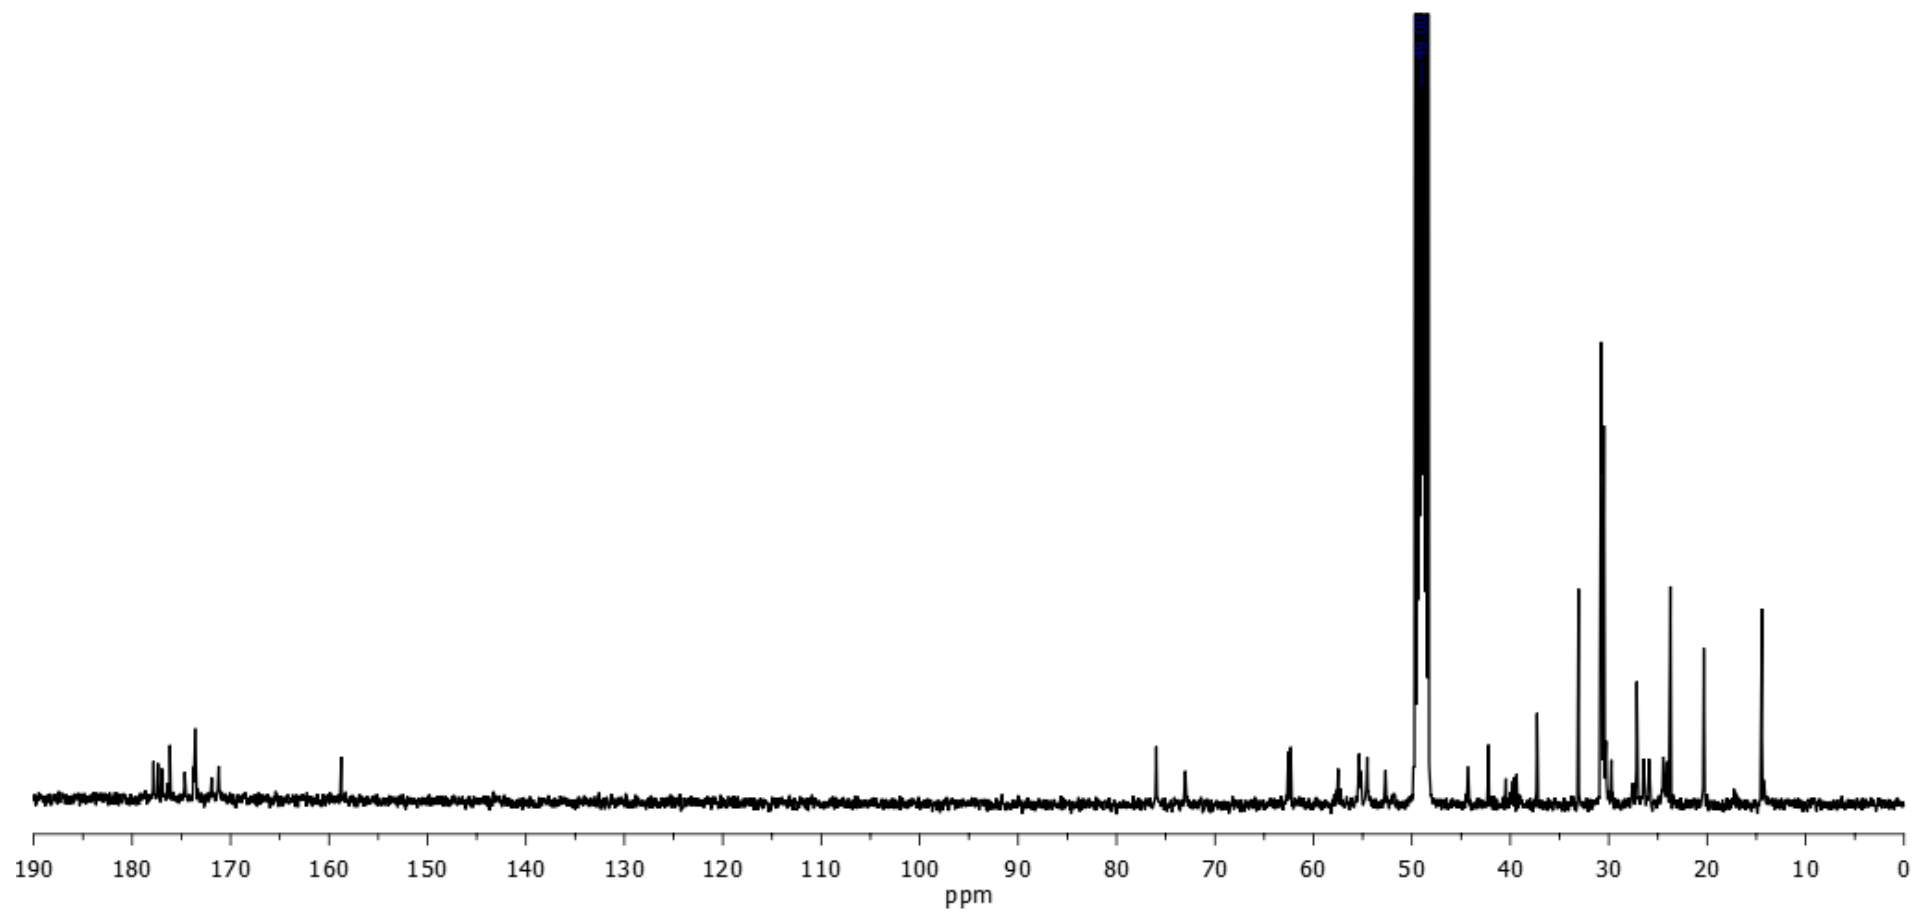

**Figure S13.**  $^{13}\text{C}$  NMR spectrum of variochelin B (**2**). (125 MHz,  $\text{methanol-}d_4$ ).



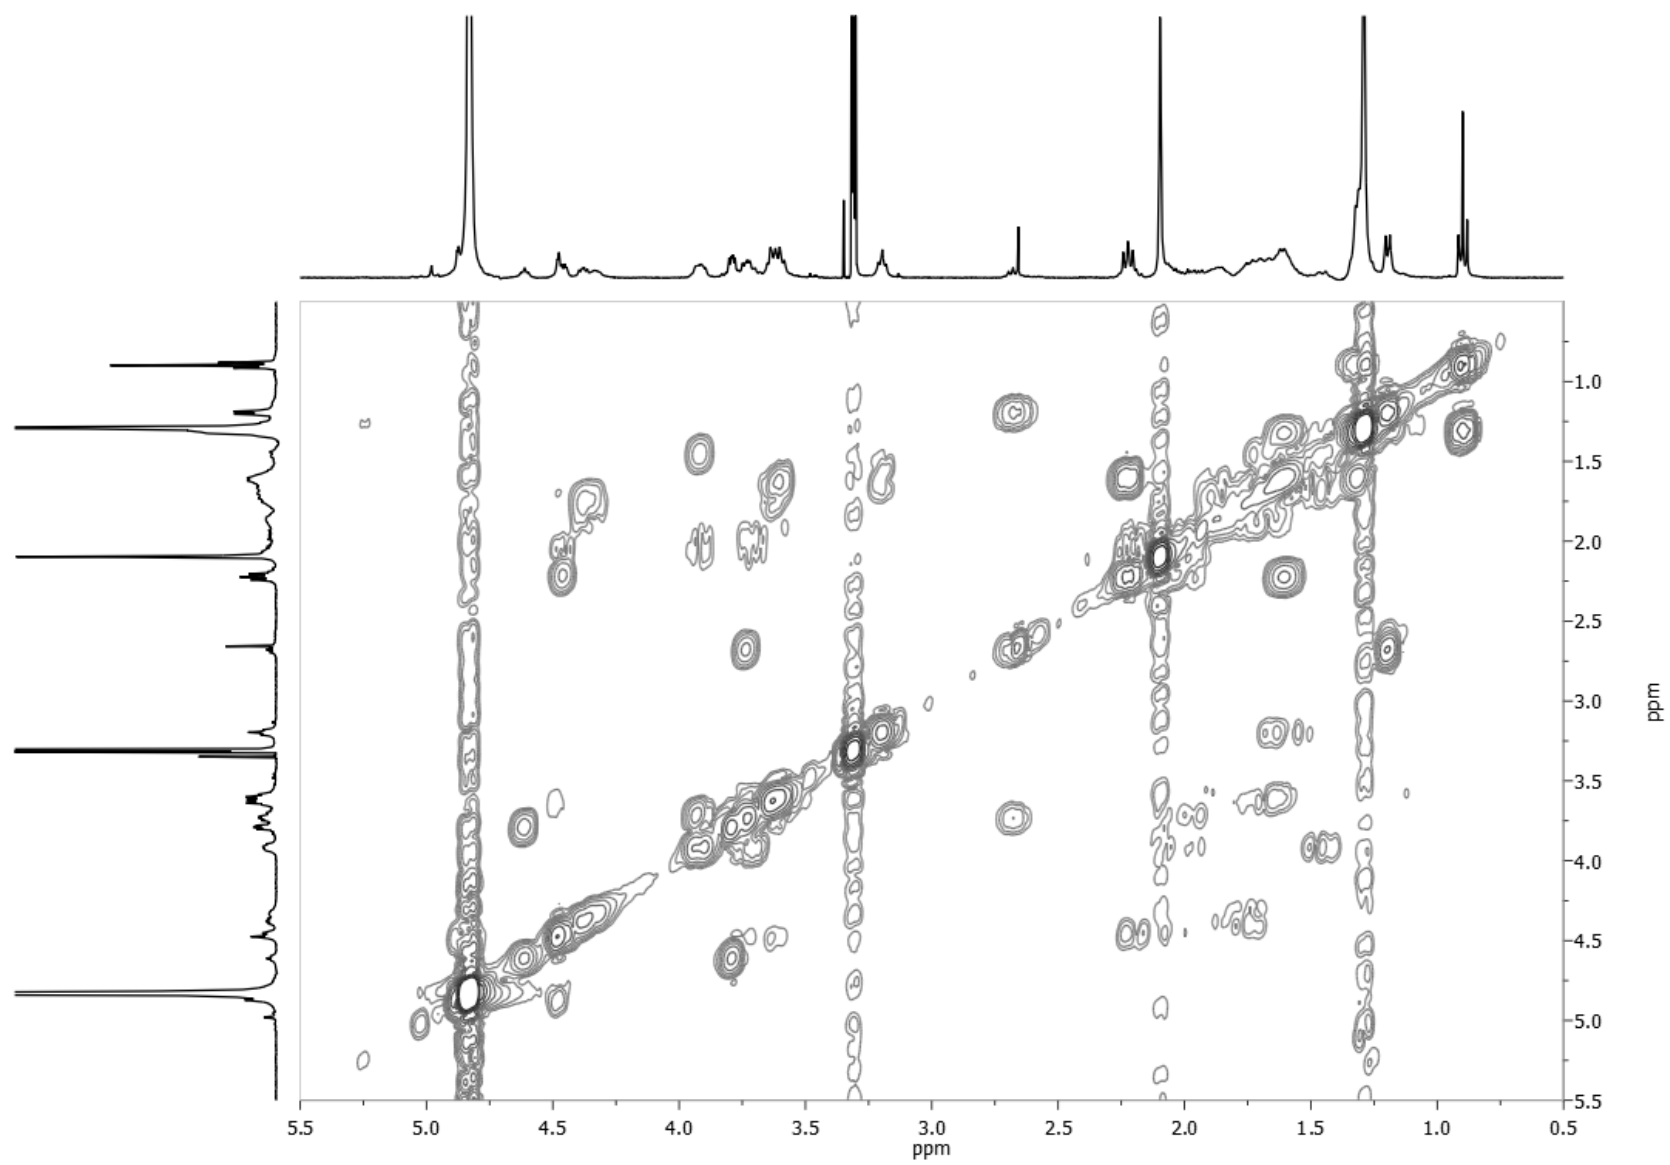

**Figure S14.** COSY spectrum of variochelin B (**2**). (500 MHz, methanol- $d_4$ ).

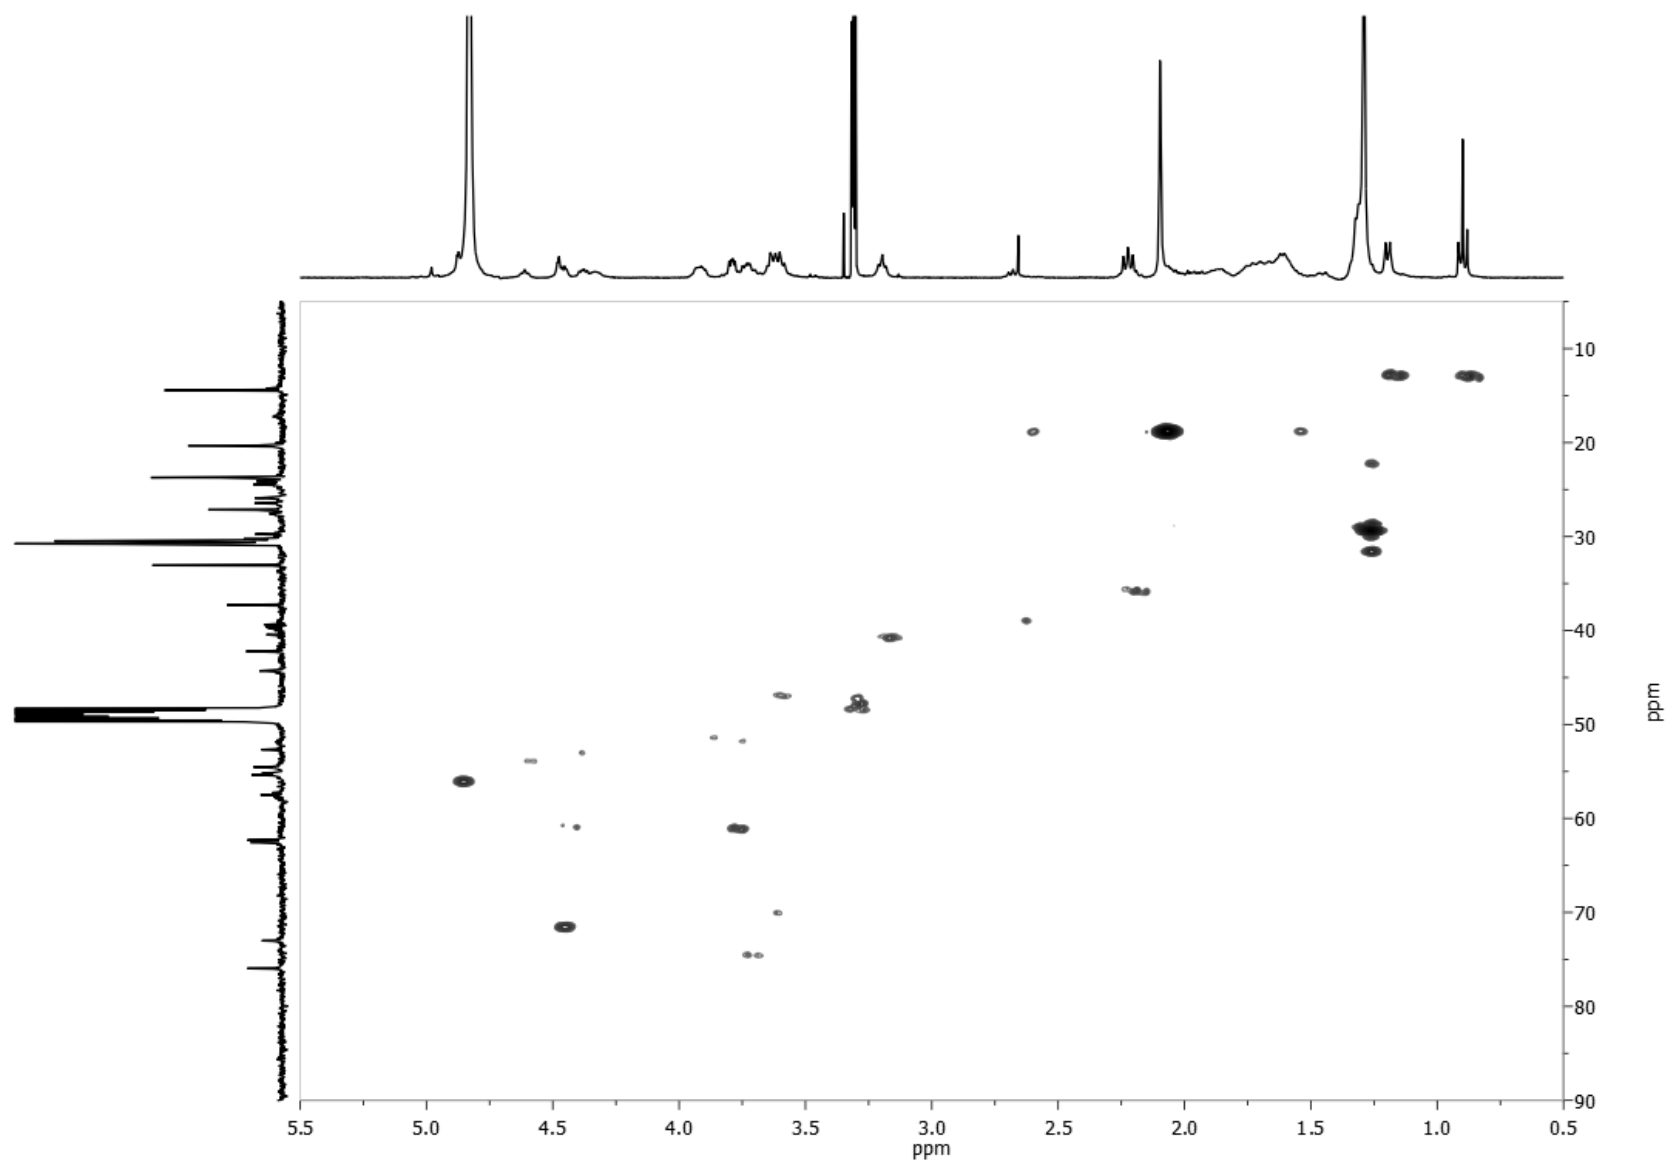

**Figure S15.** HSQC spectrum of variochelin B (**2**). (500 MHz, methanol- $d_4$ ).

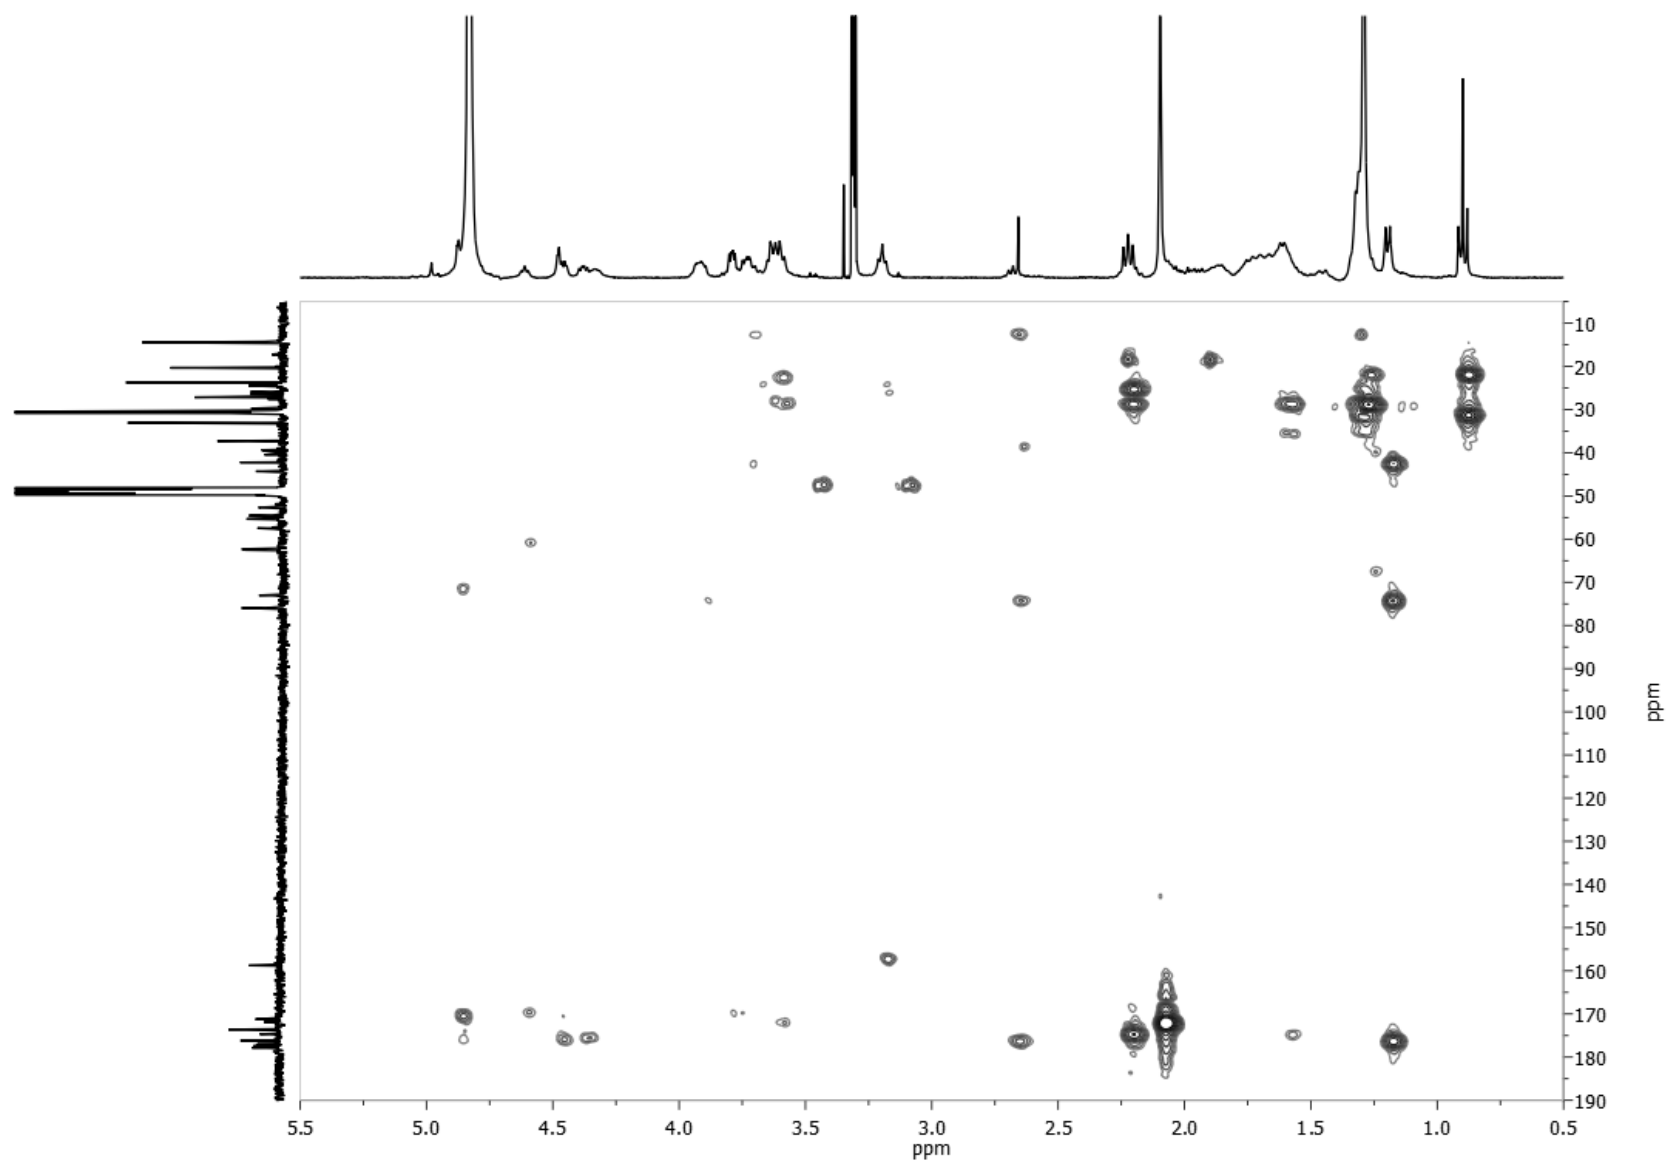

**Figure S16.** HMBC spectrum of variochelin B (**2**). (500 MHz, methanol-*d*<sub>4</sub>).

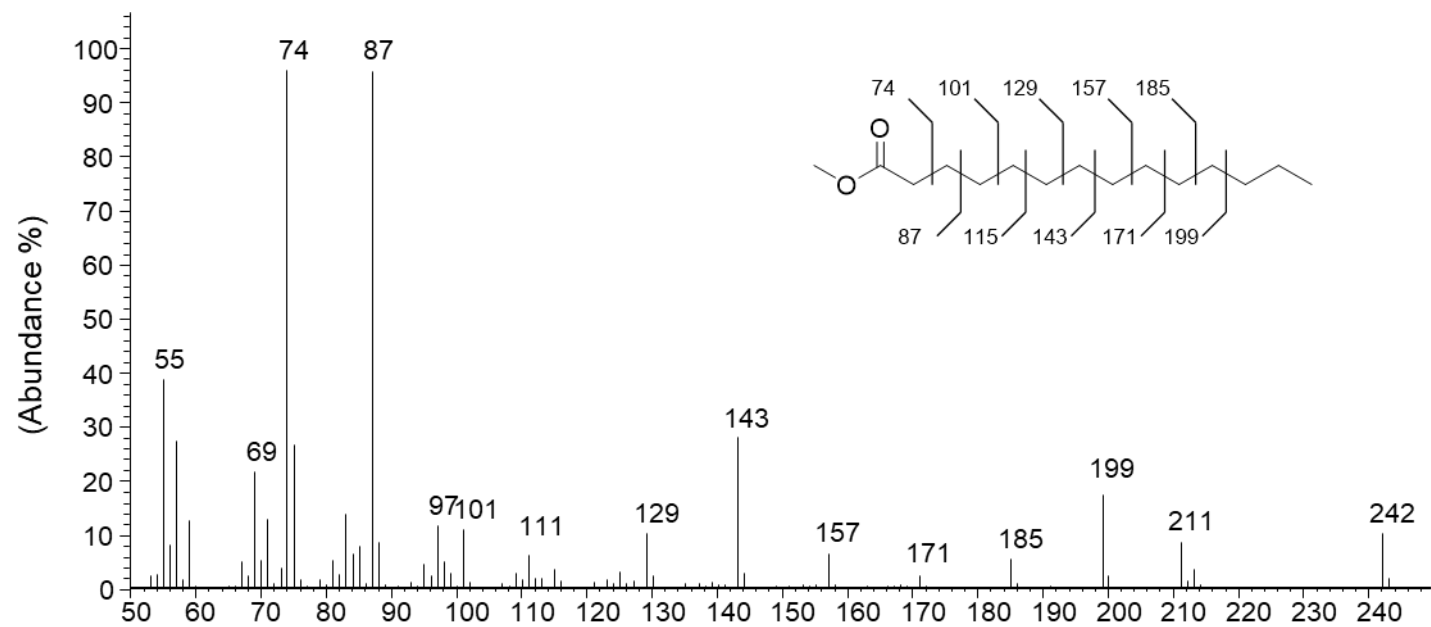

**Figure S17.** EIMS of tetradecanoic acid methyl ester in variochelin B (**2**).

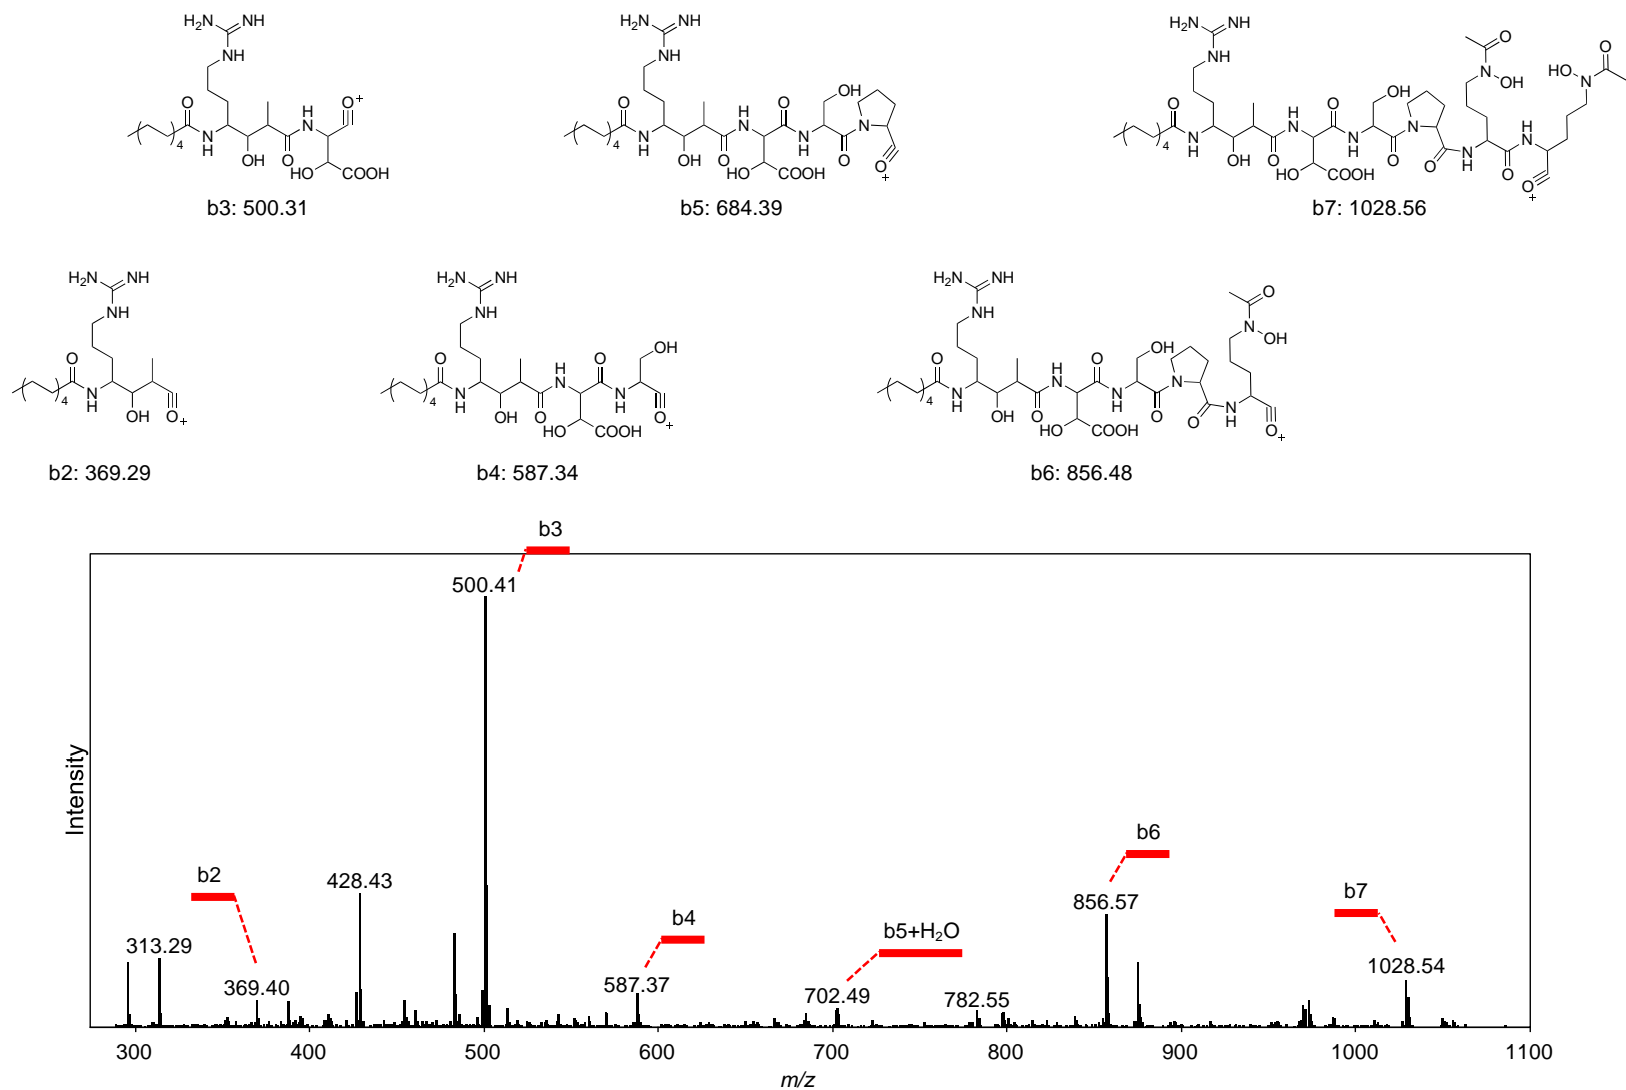

**Figure S18.** ESIMS/MS analysis of variochelin C (**3**). Structures and  $m/z$  of predicted fragmentation ions were described the top. An ion peak of  $[M + H]^+$  at  $m/z$  1047.06 was chosen as a parent ion.

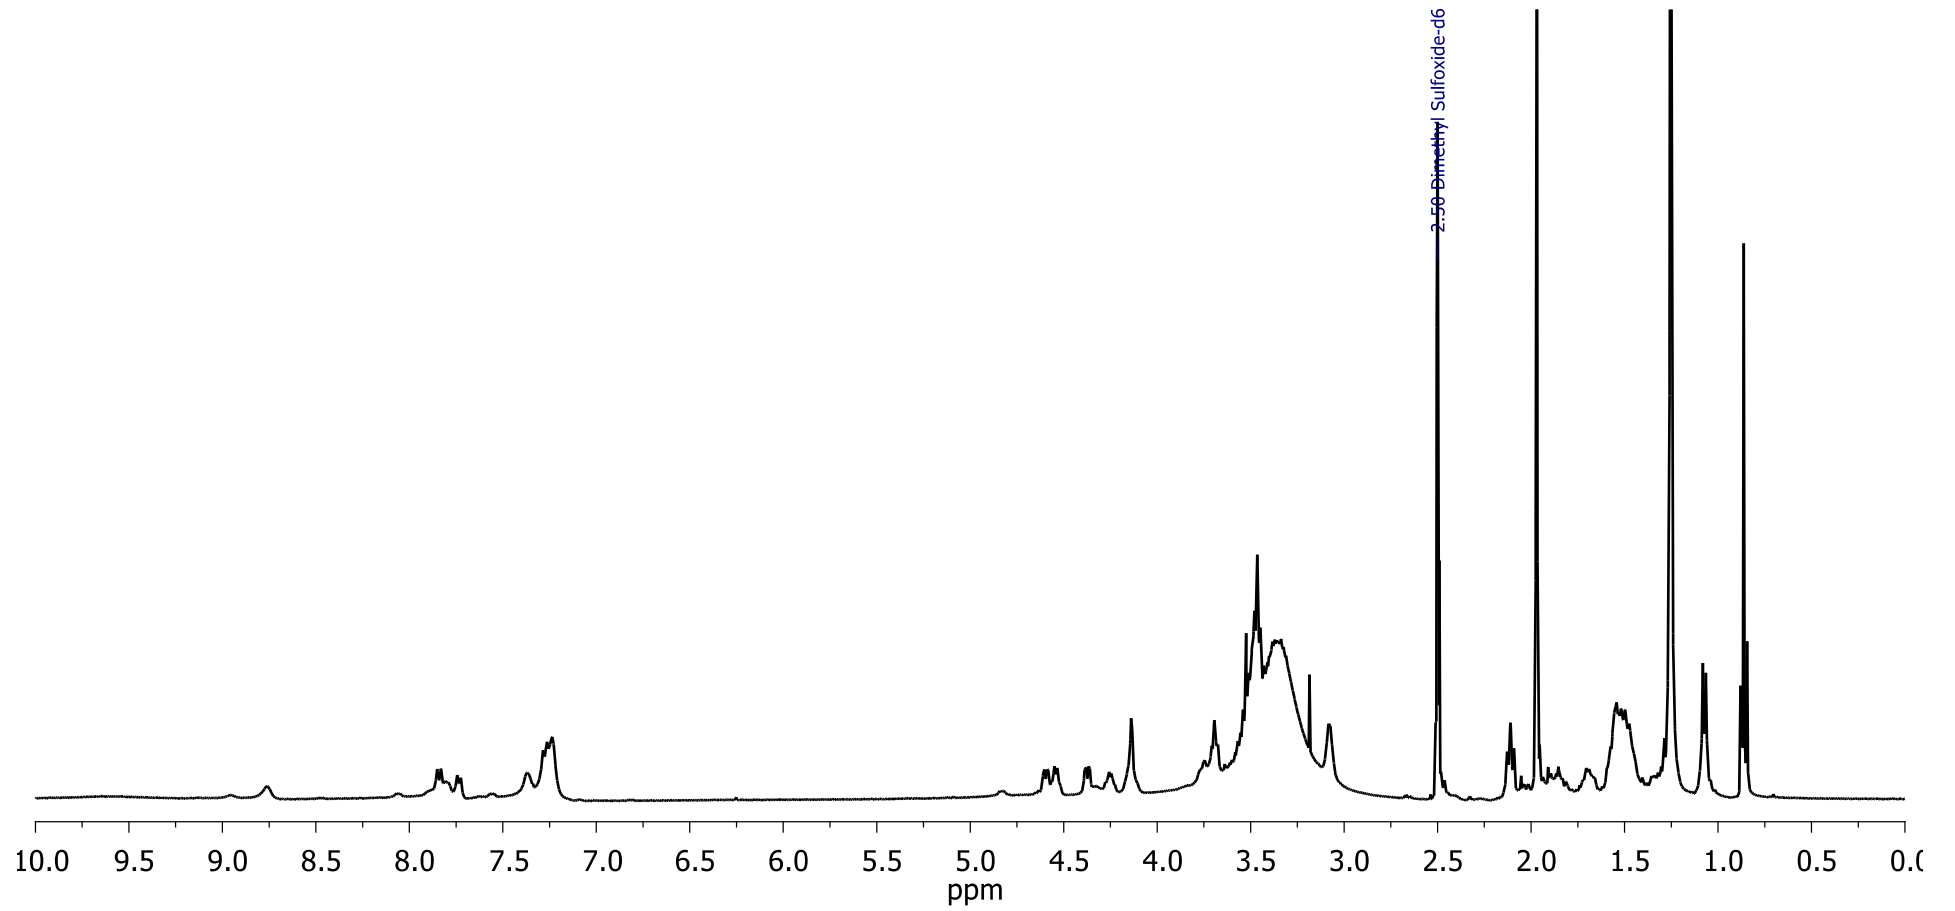

**Figure S19.**  $^1\text{H}$  NMR spectrum of variochelin C (3) (500 MHz,  $\text{DMSO-}d_6$ ).

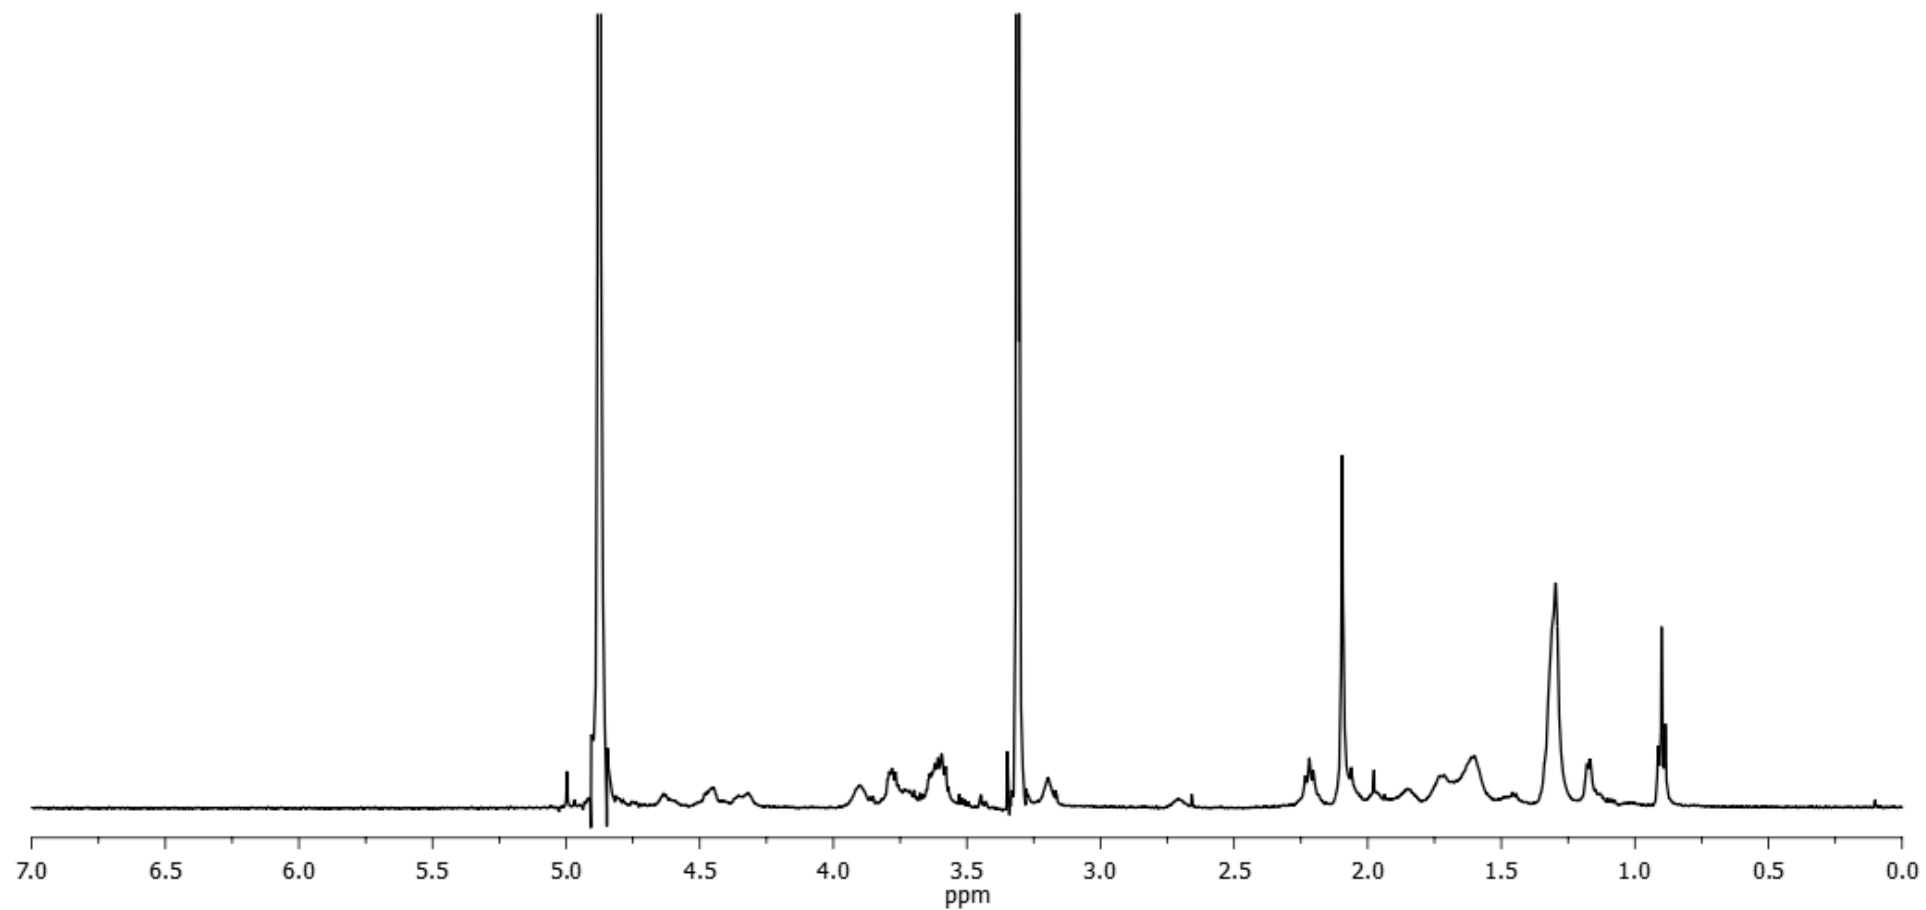

**Figure S20.**  $^1\text{H}$  NMR spectrum of variochelin C (**3**). (500 MHz, methanol- $d_4$ ).

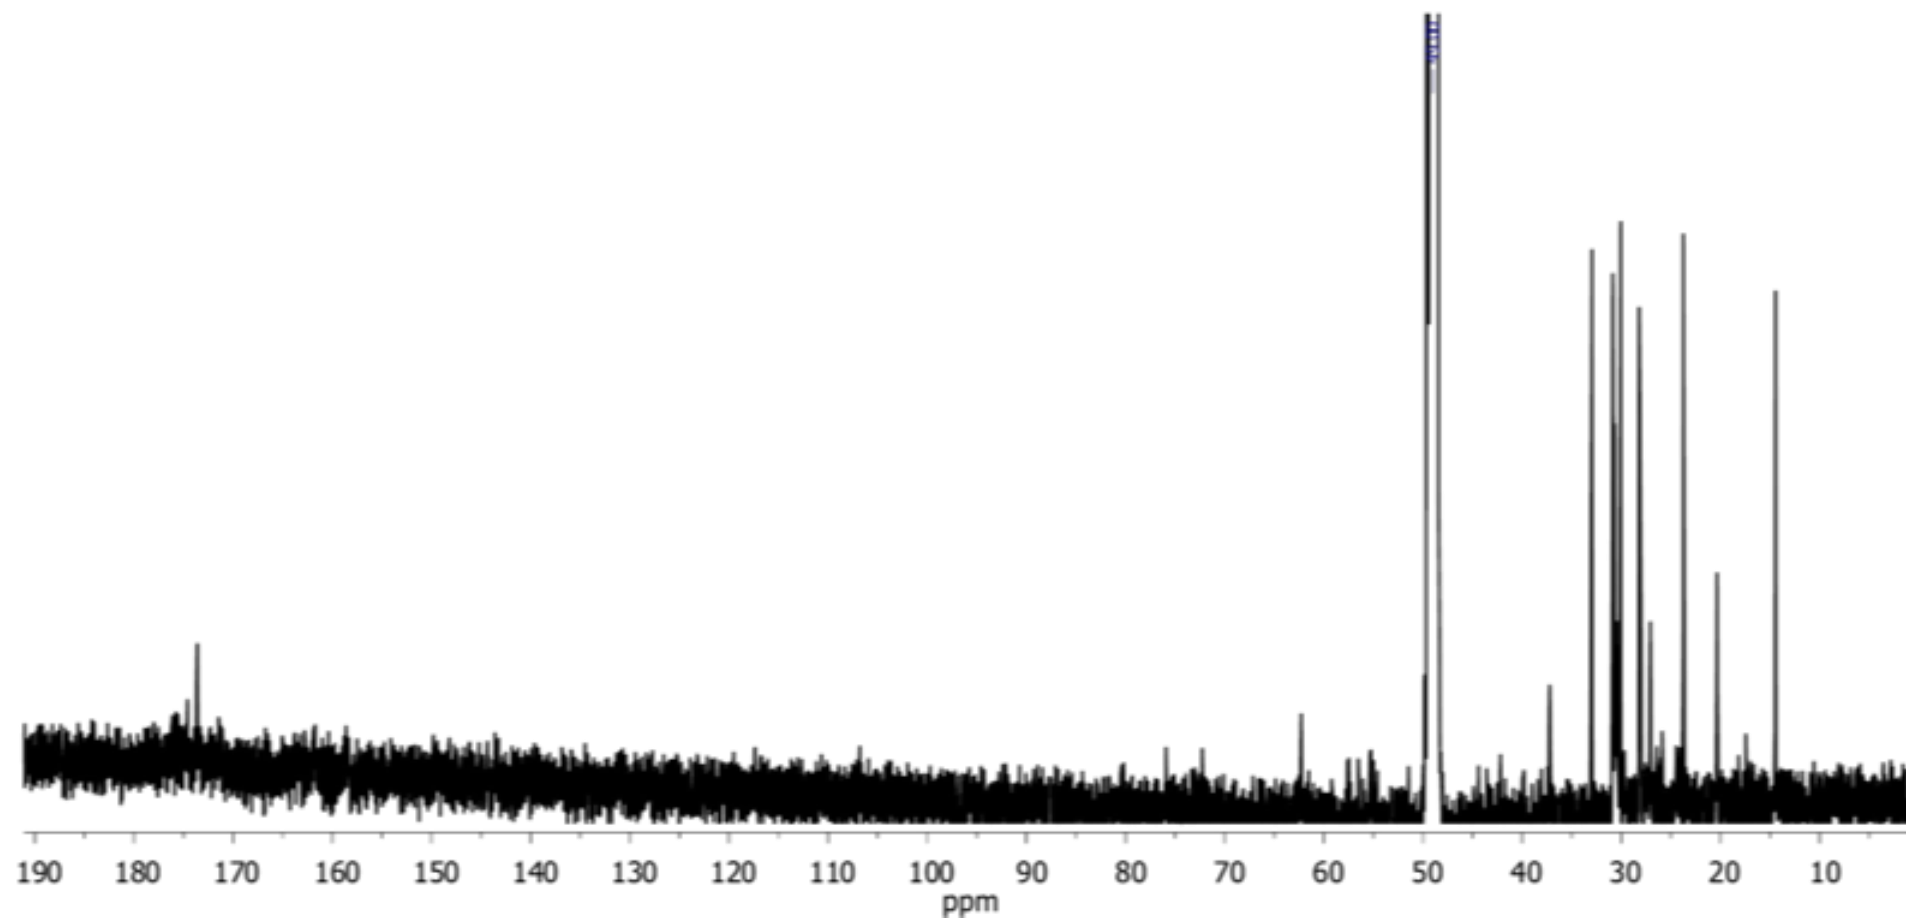

**Figure S21.**  $^{13}\text{C}$  NMR spectrum of variochelin C (**3**). (125 MHz, methanol- $d_4$ ).



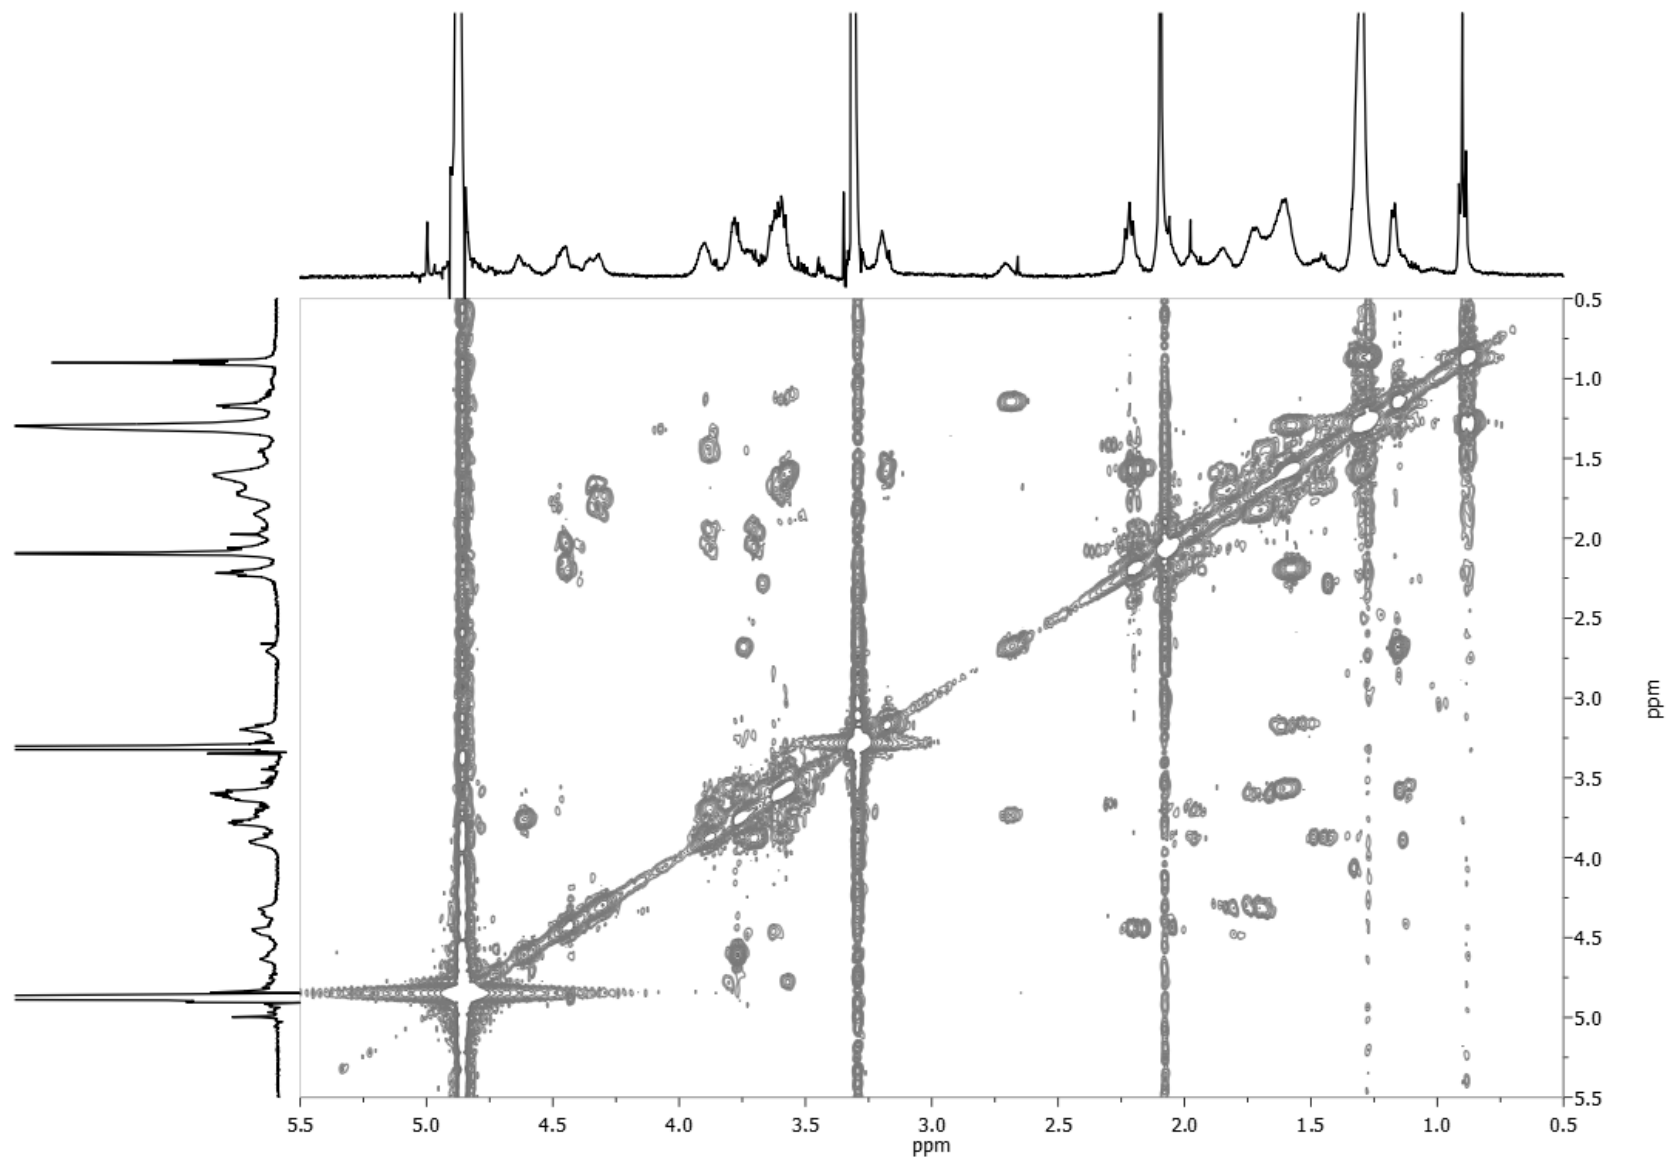

**Figure S22.** COSY spectrum of variochelin C (**3**). (500 MHz, methanol- $d_4$ ).

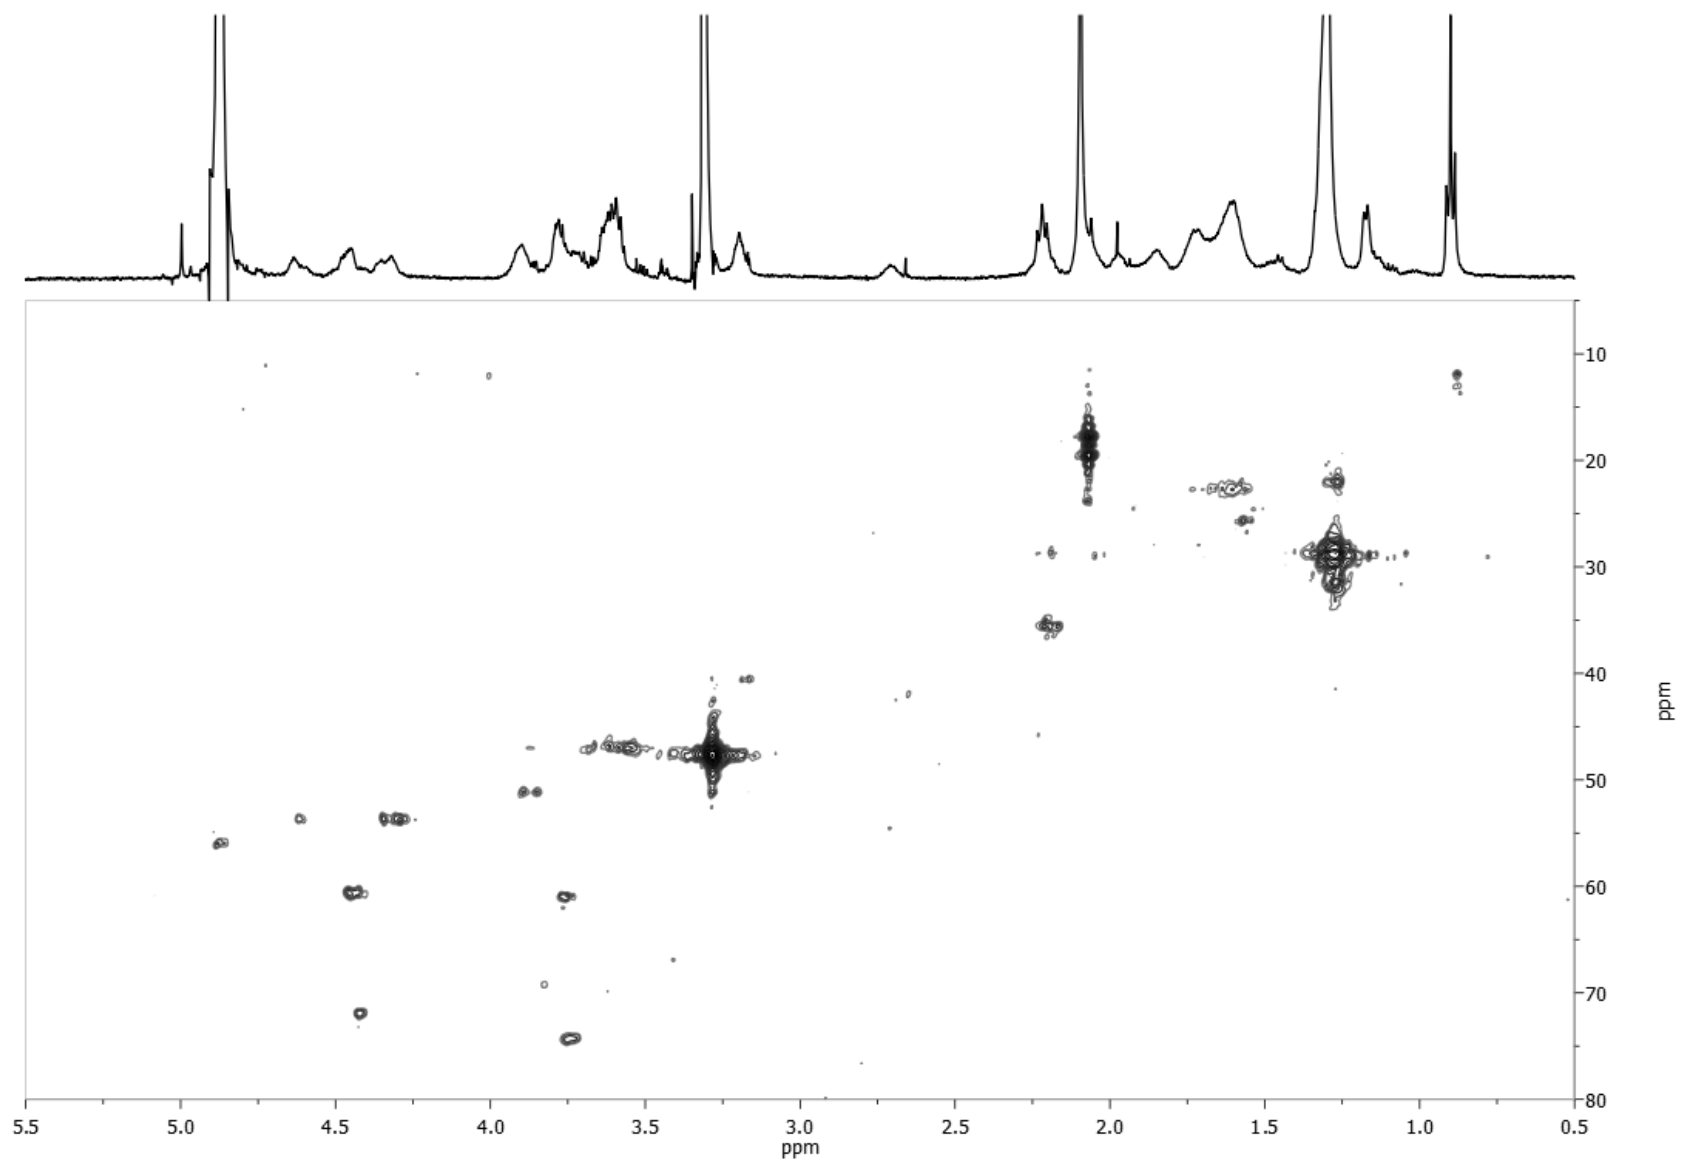

**Figure S23.** HSQC spectrum of variochelin C (**3**). (500 MHz, methanol- $d_4$ ).

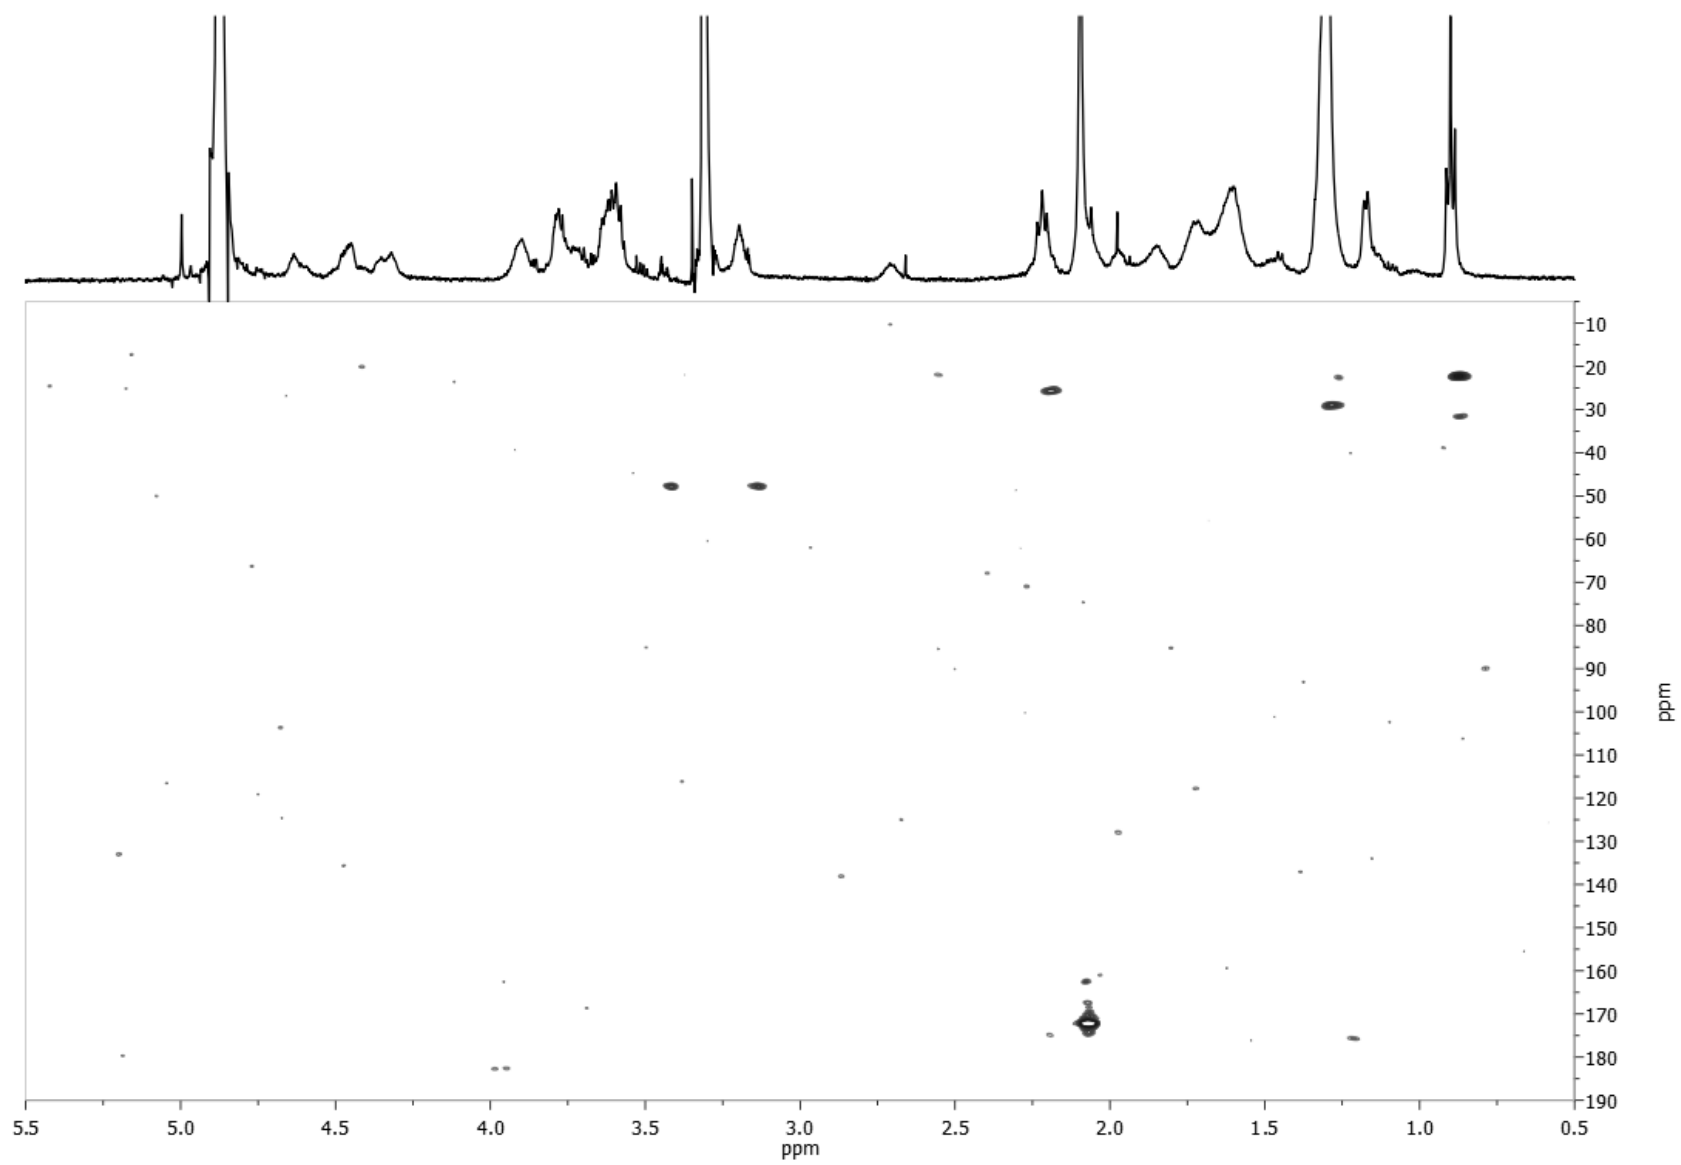

**Figure S24.** HMBC spectrum of variochelin C (**3**). (500 MHz, methanol-*d*<sub>4</sub>).

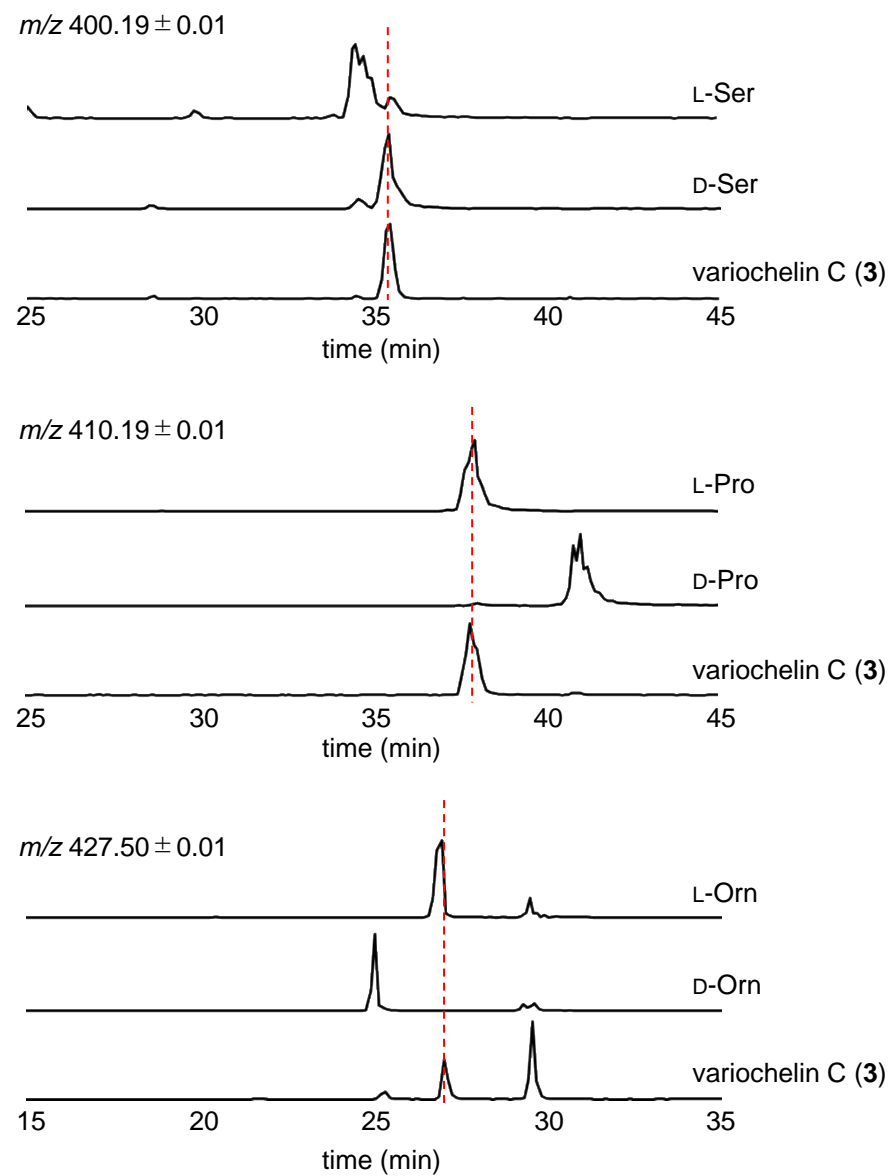

**Figure S25.** Extracted ion chromatograms from advanced Marfey's analyses of variochelin C (3).

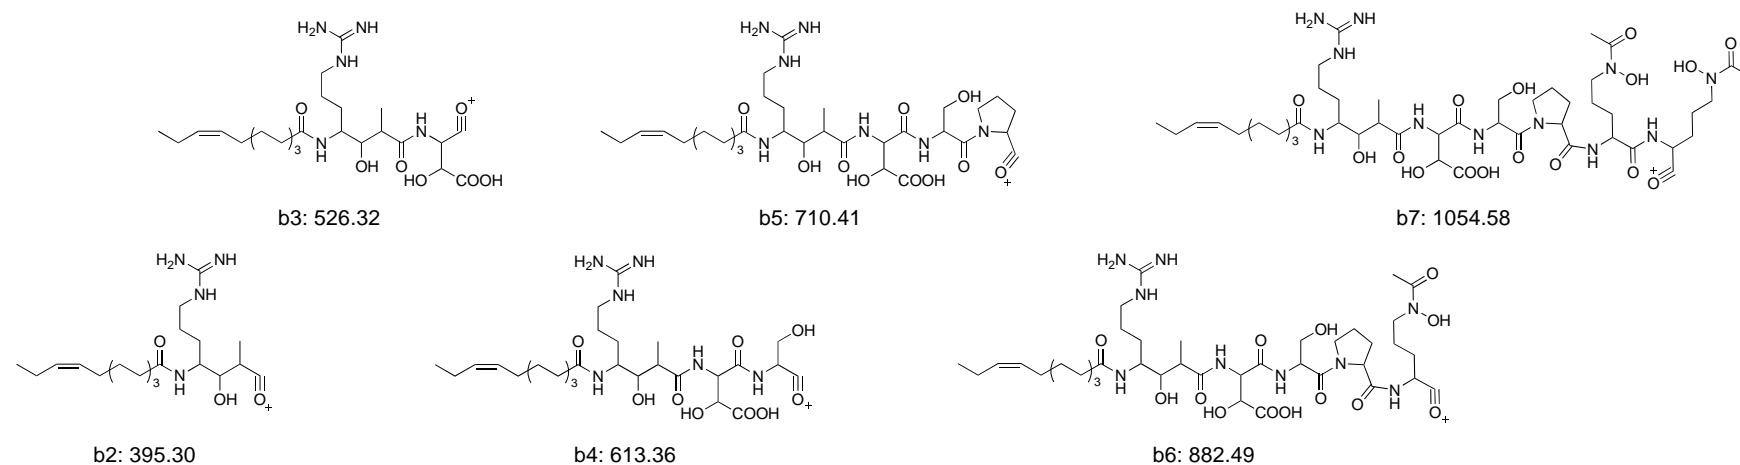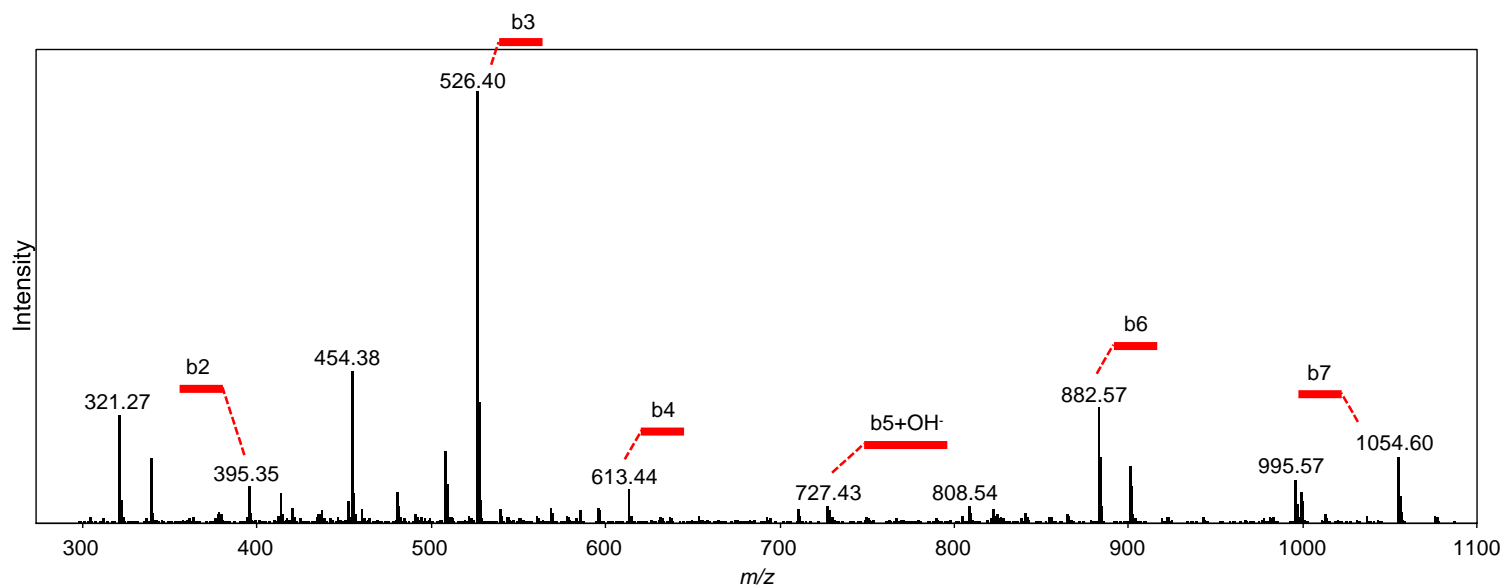

**Figure S26.** ESIMS/MS analysis of variochelin D (**4**). Structures and  $m/z$  of predicted fragmentation ions were described the top. An ion peak of  $[M + H]^+$  at  $m/z$  1072.95 was chosen as a parent ion.

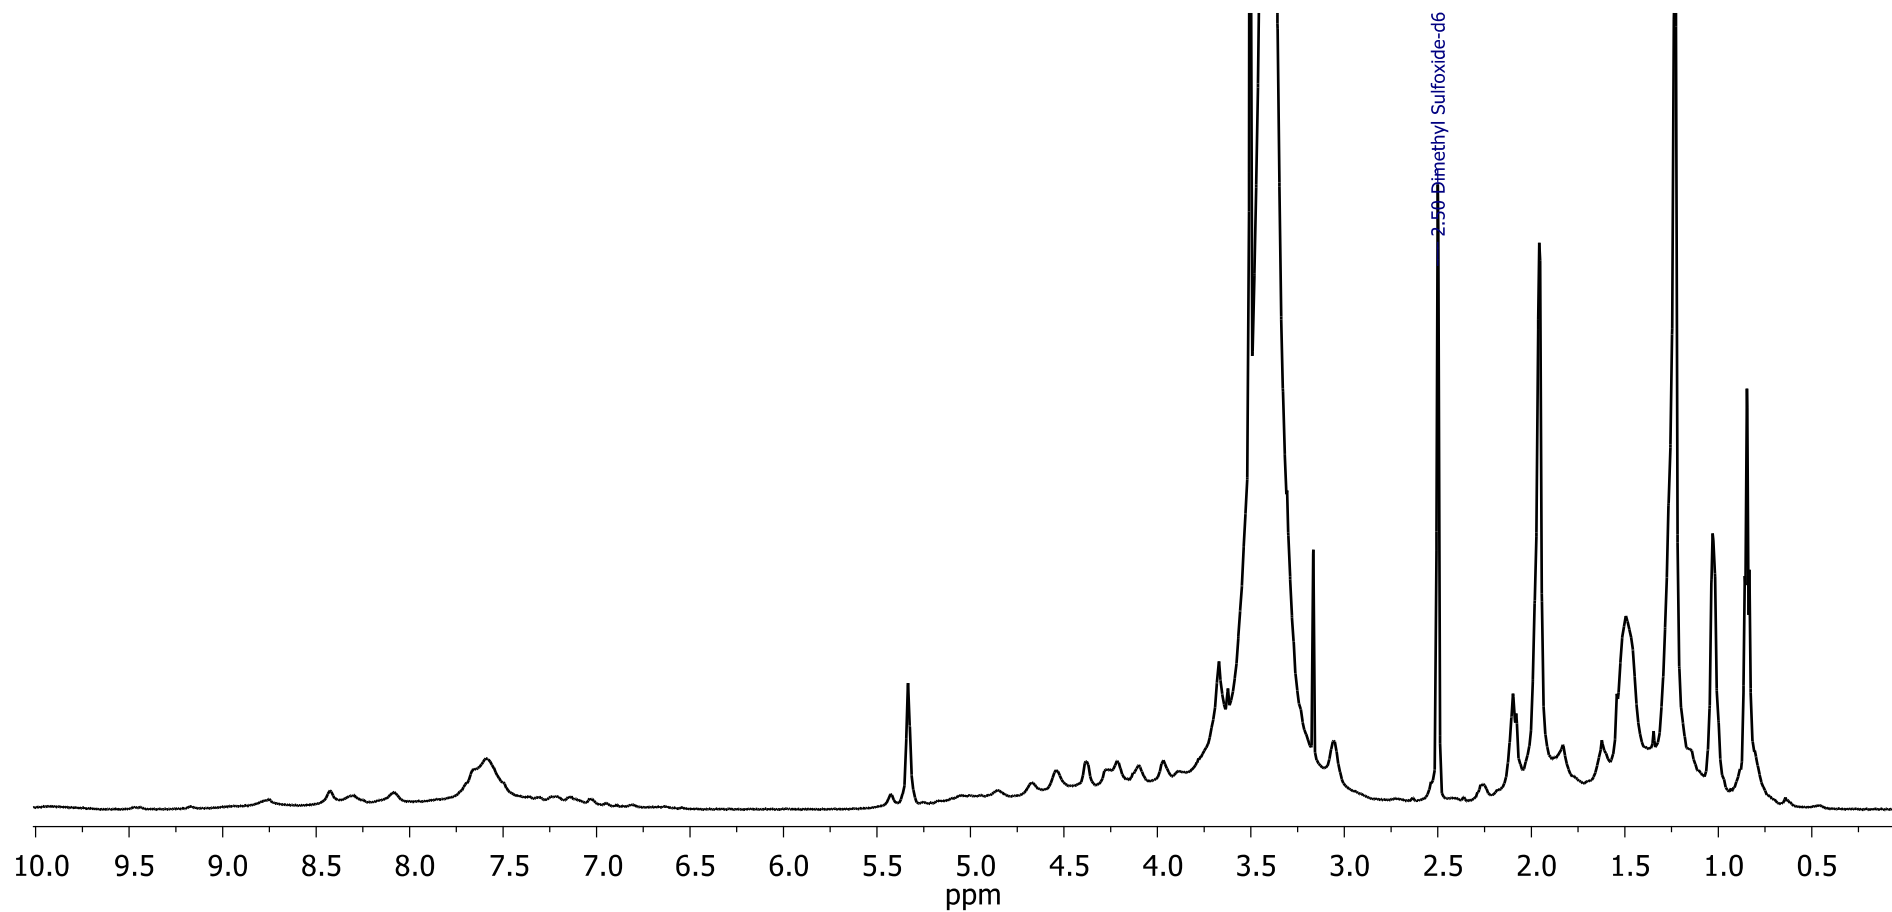

**Figure S27.** <sup>1</sup>H NMR spectrum of variochelin D (**4**) (500 MHz, DMSO-*d*<sub>6</sub>).

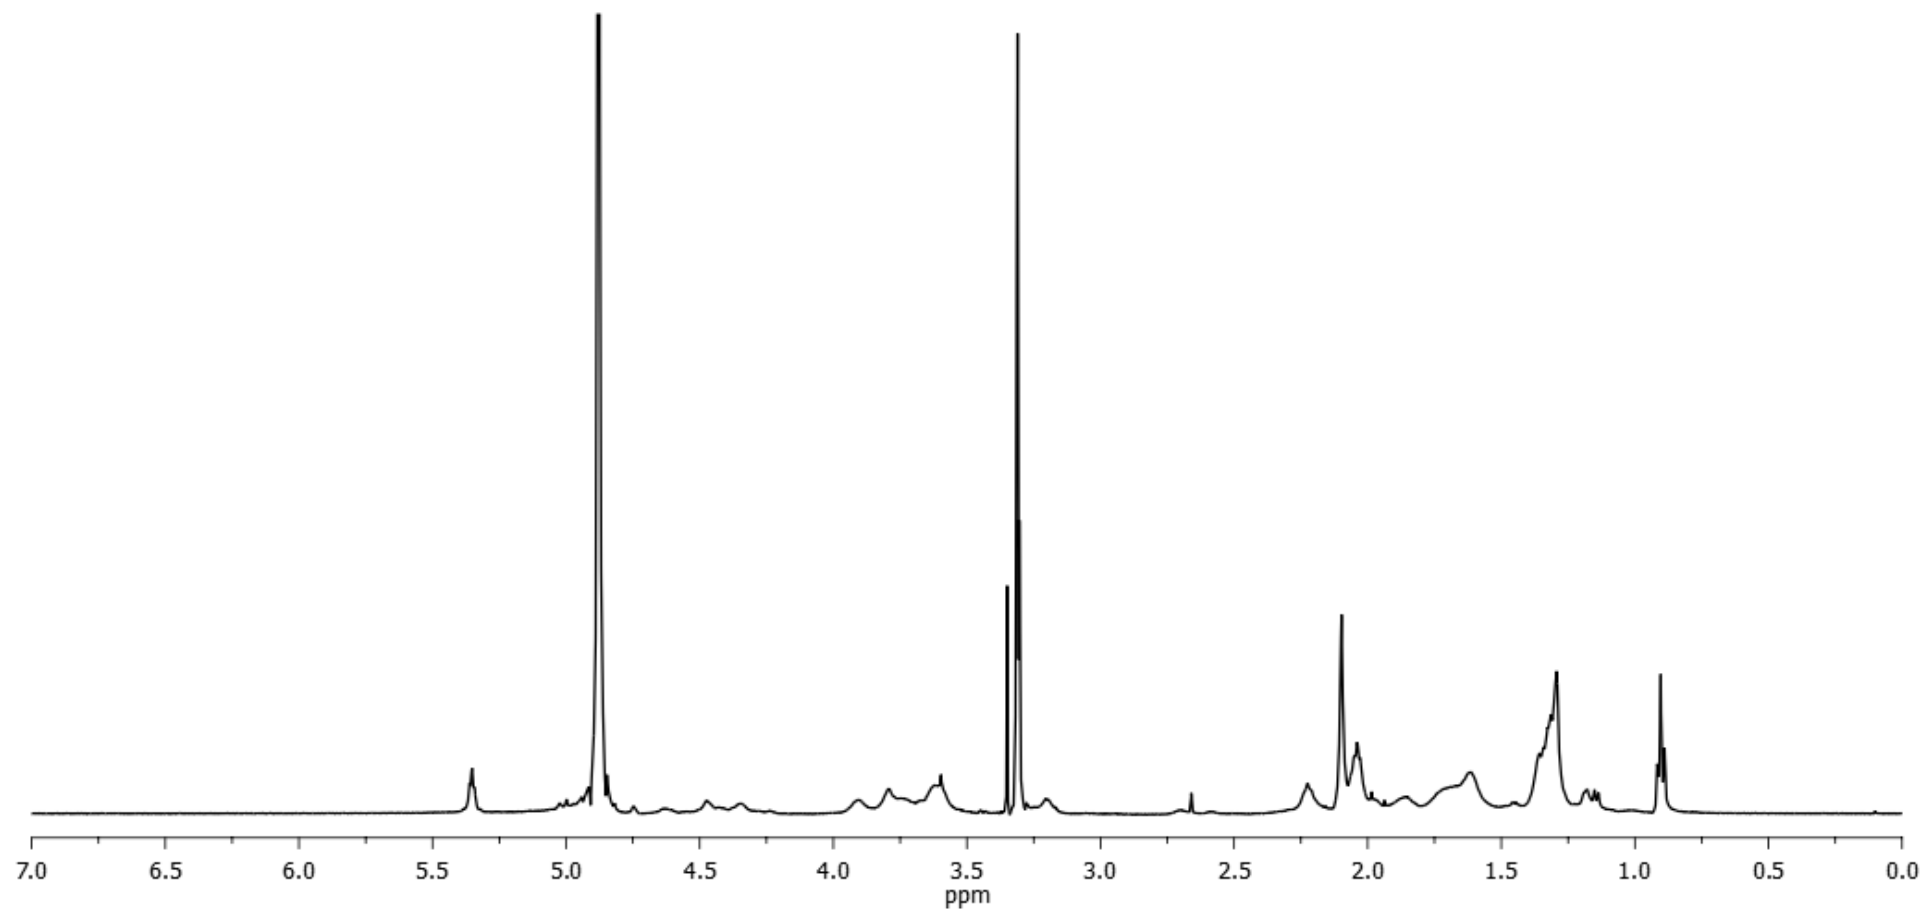

**Figure S28.**  $^1\text{H}$  NMR spectrum of variochelin D (**4**). (500 MHz, methanol- $d_4$ ).

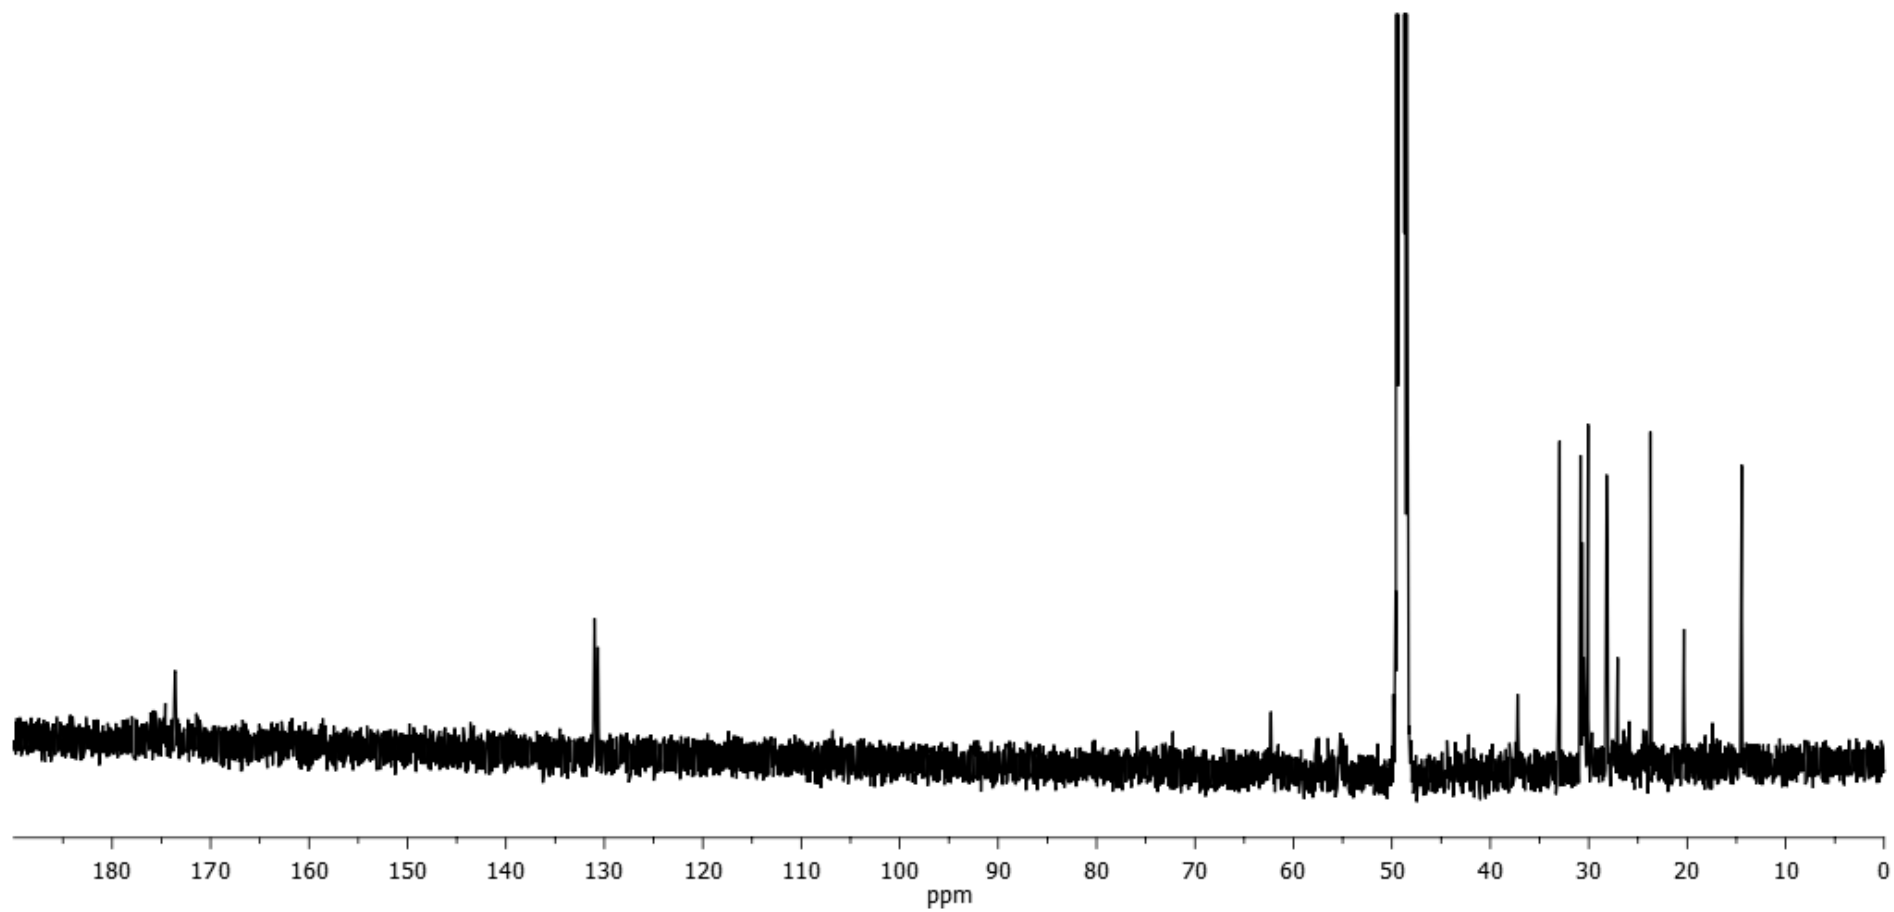

**Figure S29.**  $^{13}\text{C}$  NMR spectrum of variochelin D (**4**). (125 MHz, methanol- $d_4$ ).



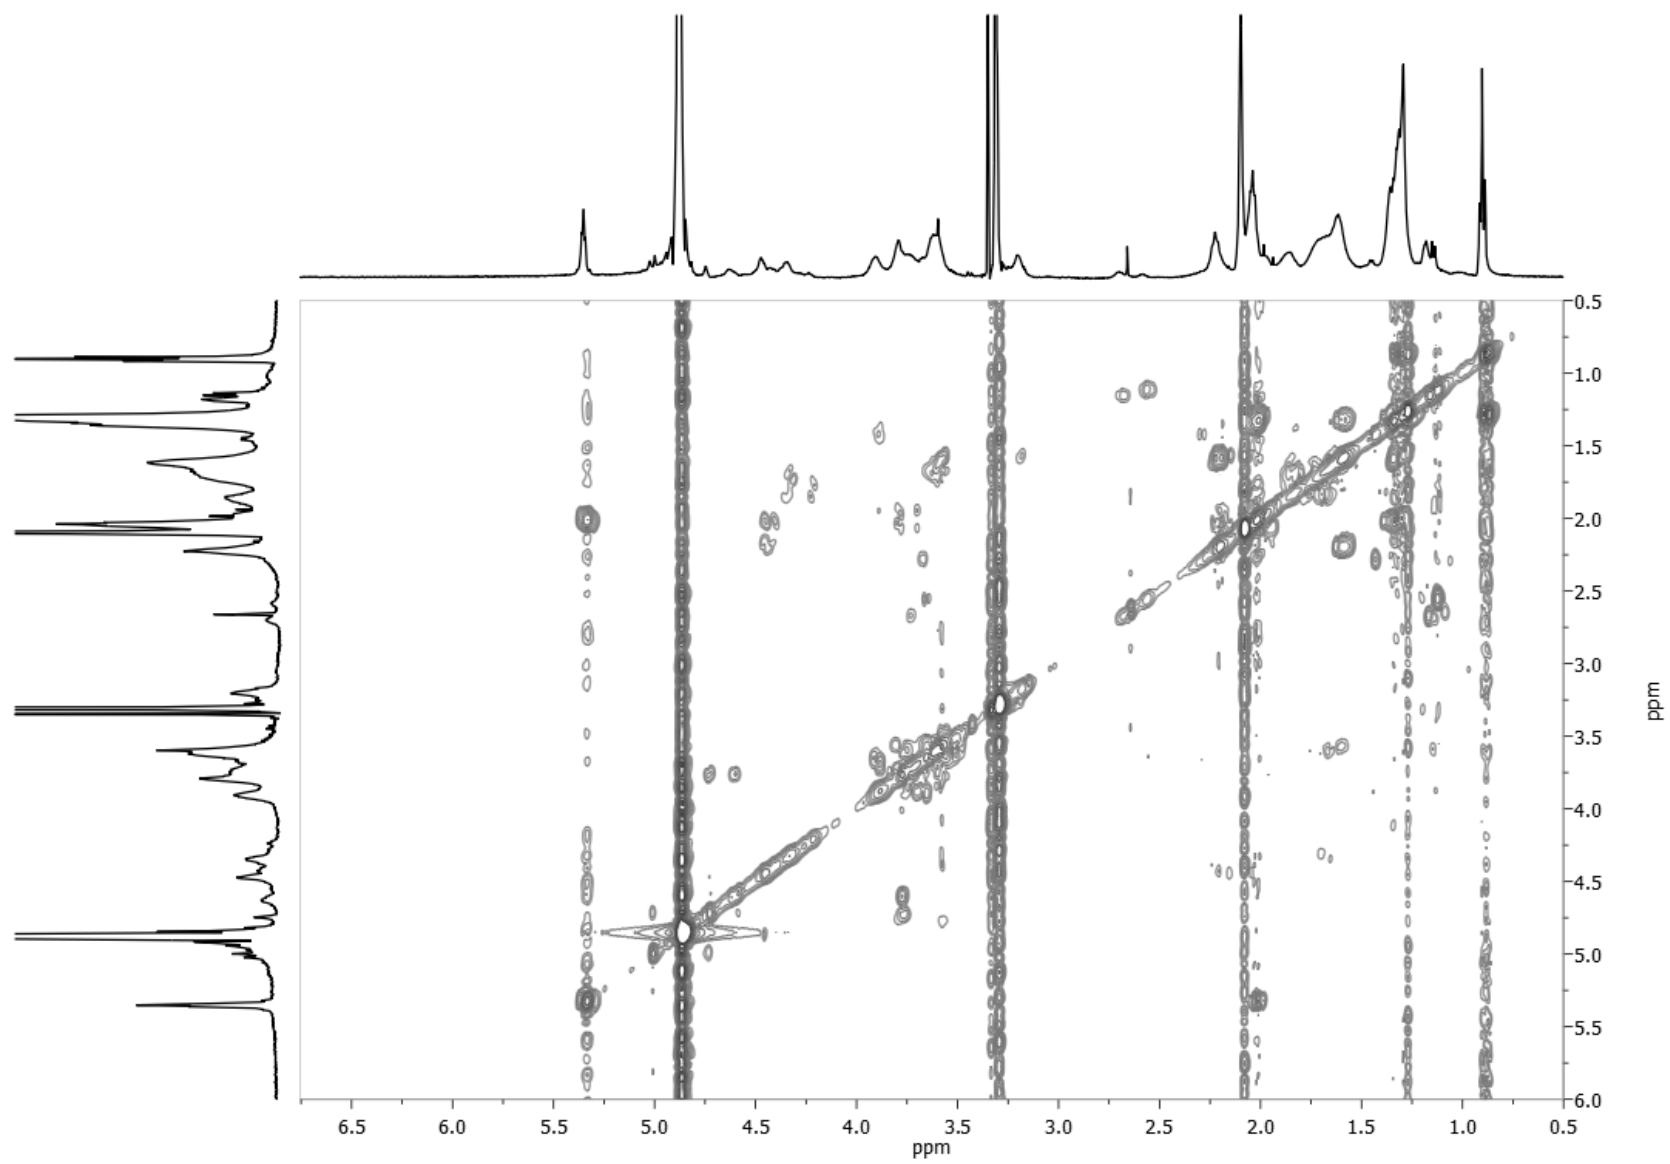

**Figure S30.** COSY spectrum of variochelin D (**4**). (500 MHz, methanol-*d*<sub>4</sub>).

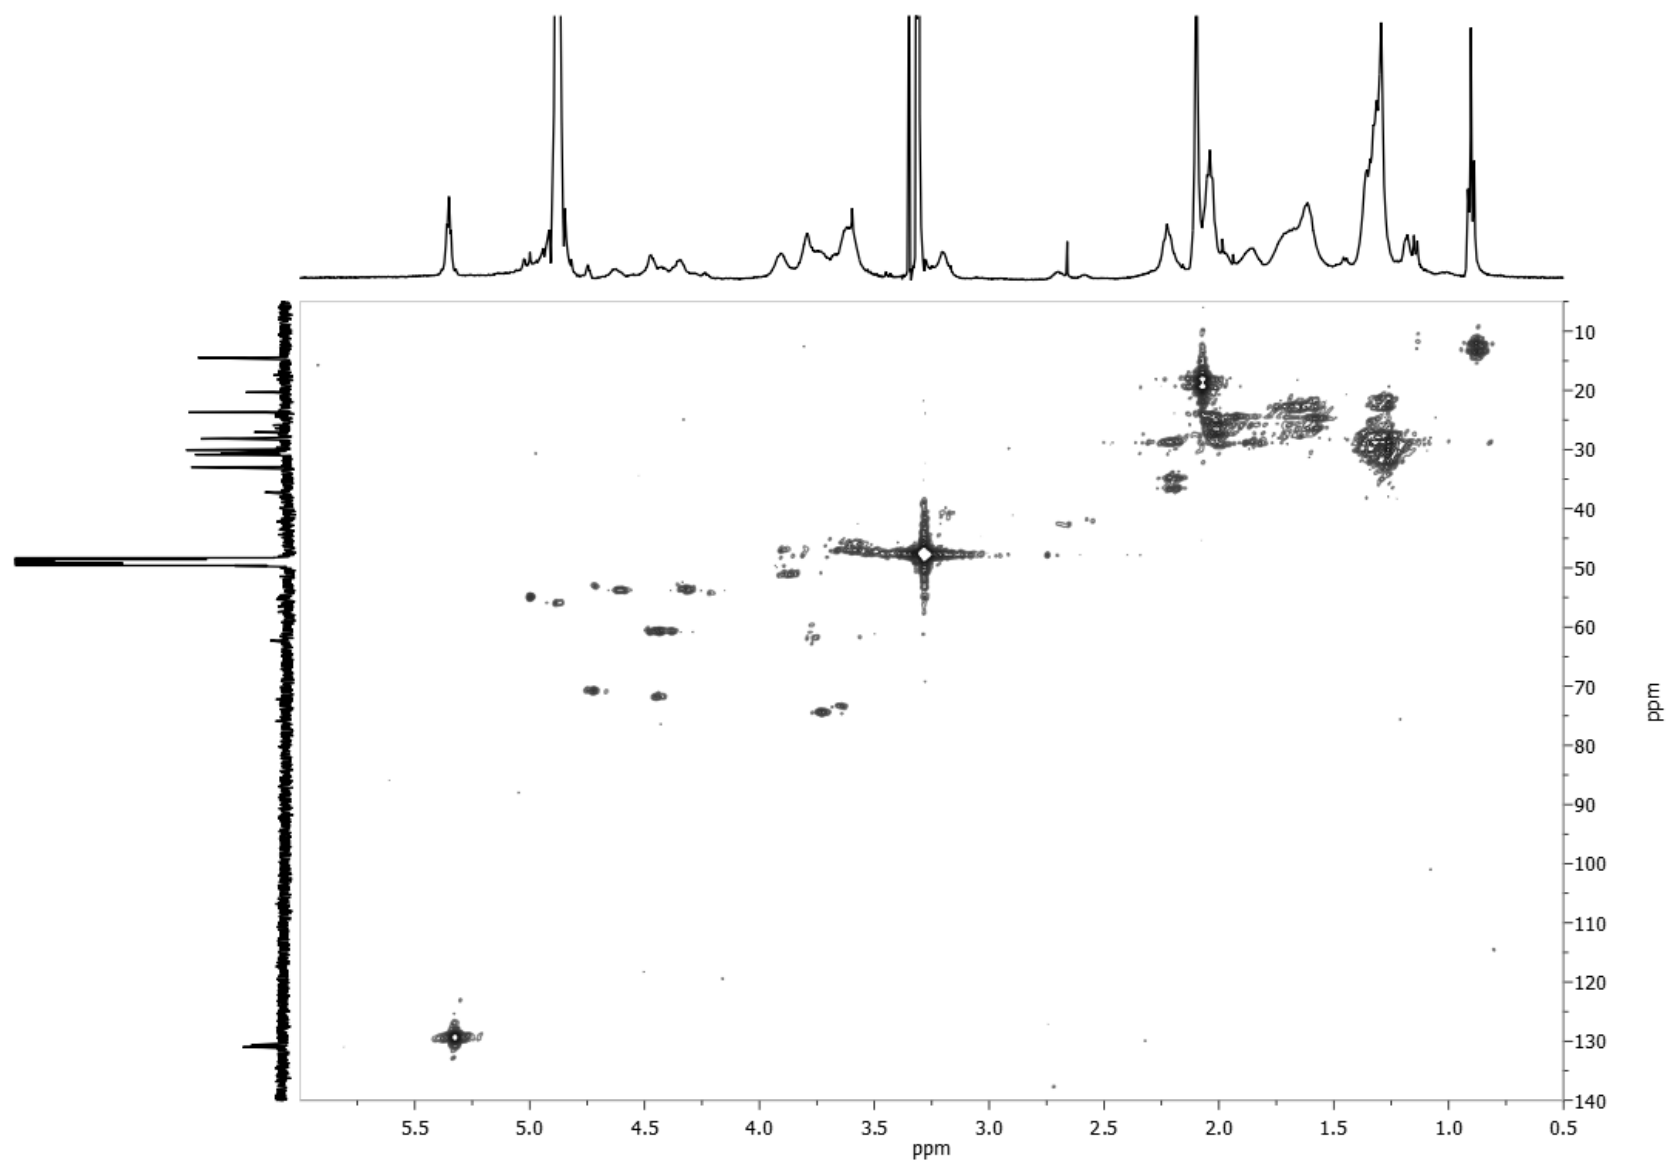

**Figure S31.** HSQC spectrum of variochelin D (**4**). (500 MHz, methanol- $d_4$ ).

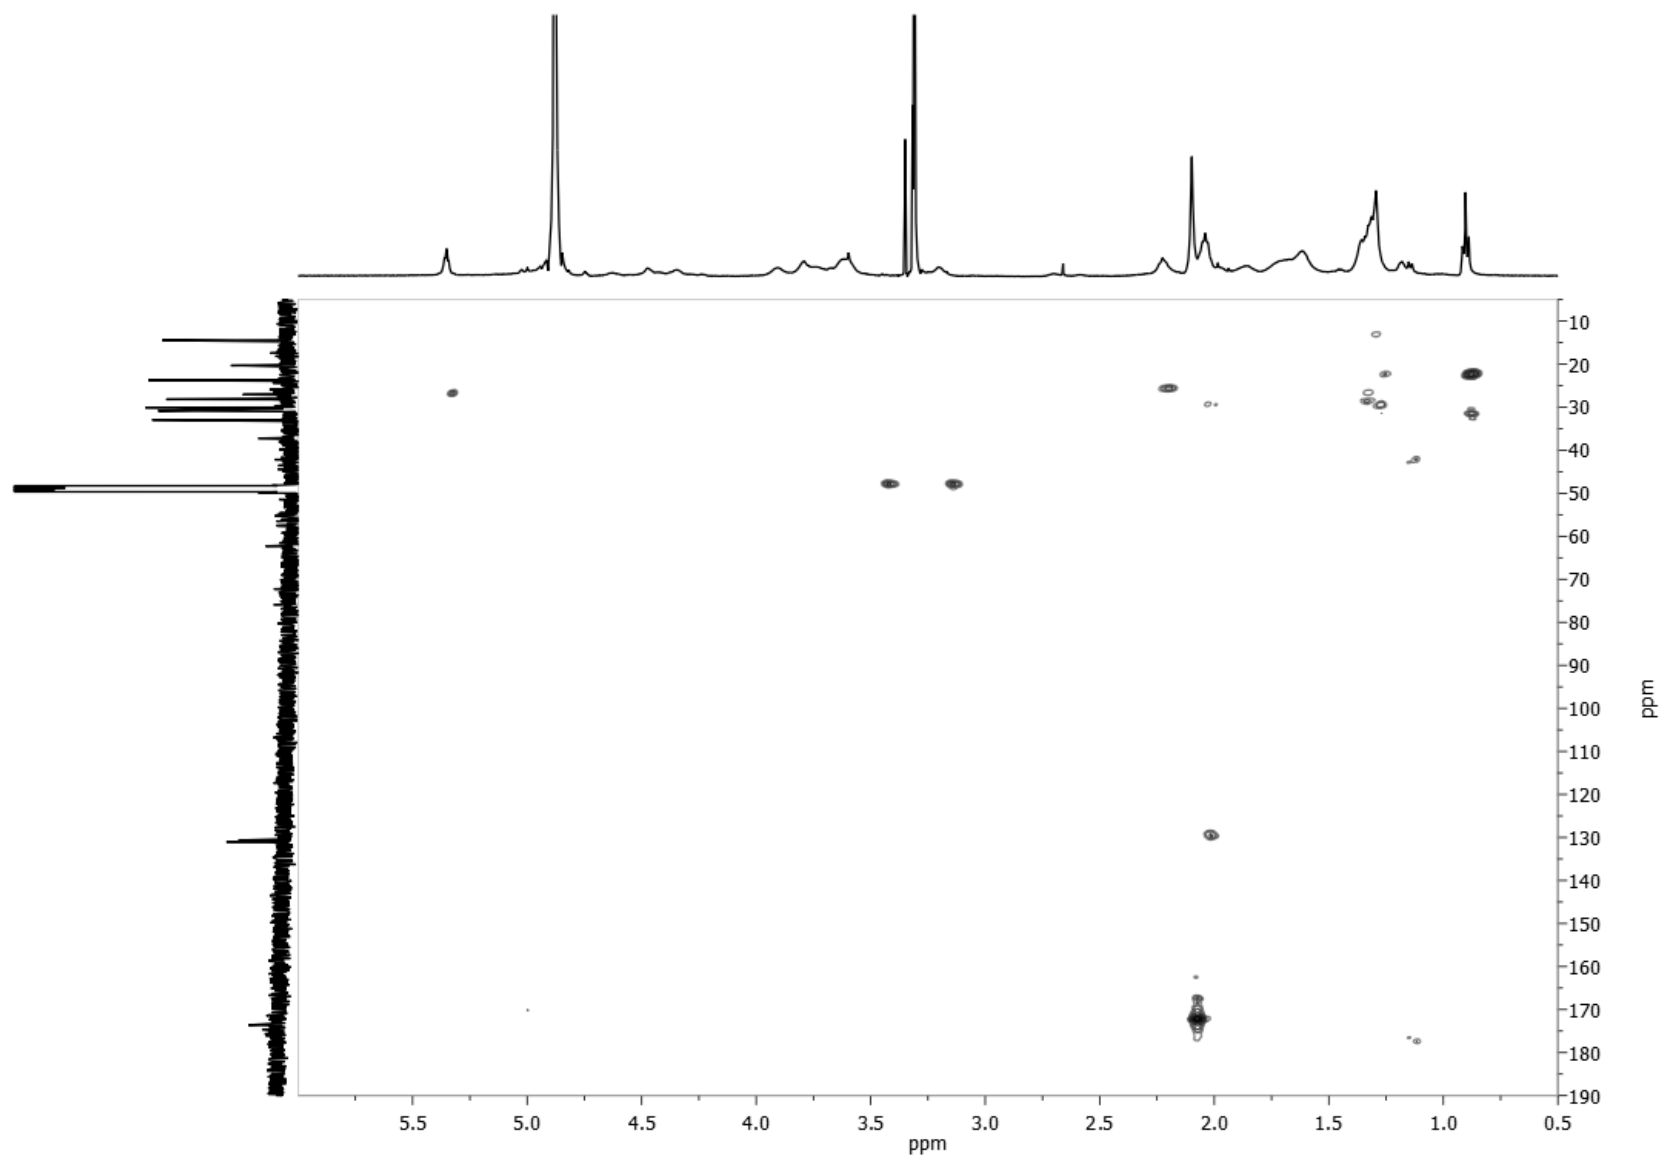

**Figure S32.** HMBC spectrum of variochelin D (**4**). (500 MHz, methanol- $d_4$ ).

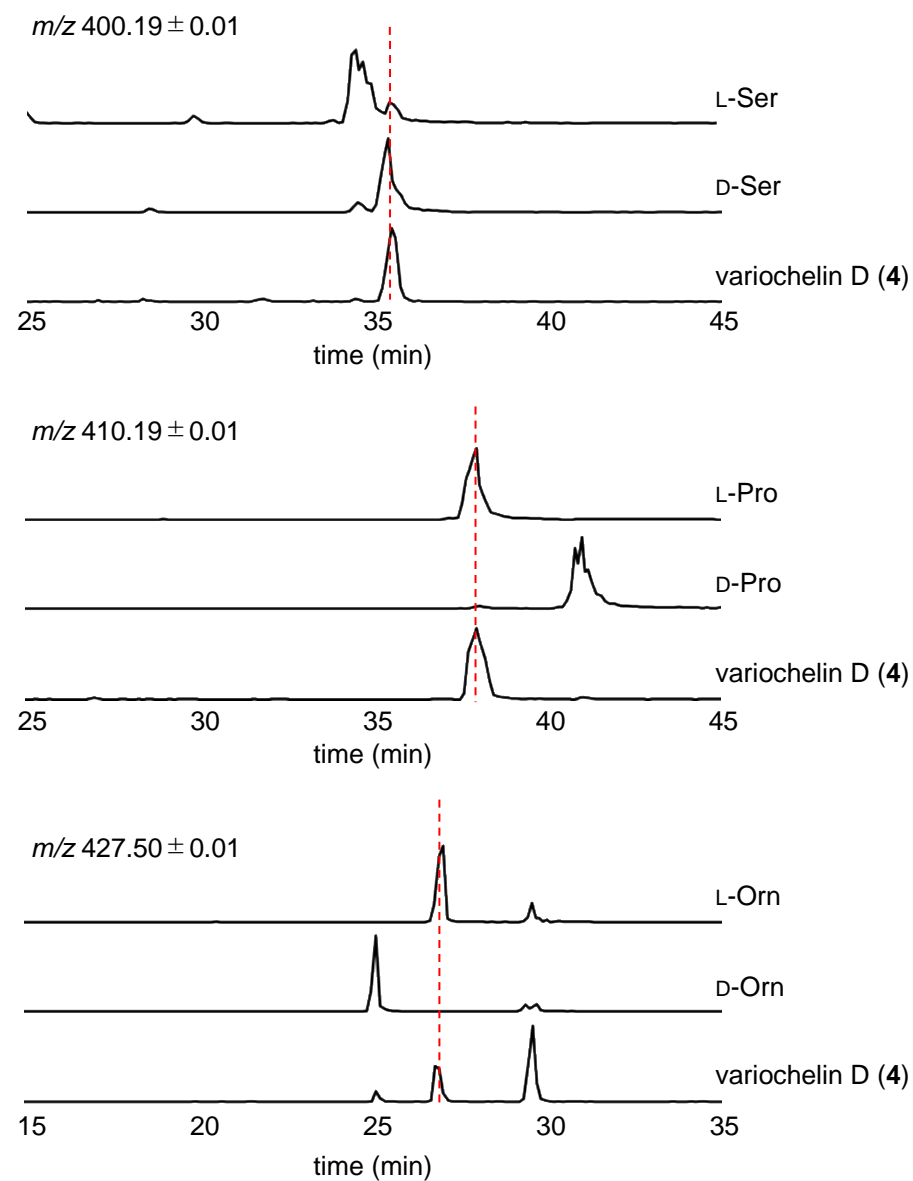

**Figure S33.** Extracted ion chromatograms from advanced Marfey's analyses of variochelin D (4).

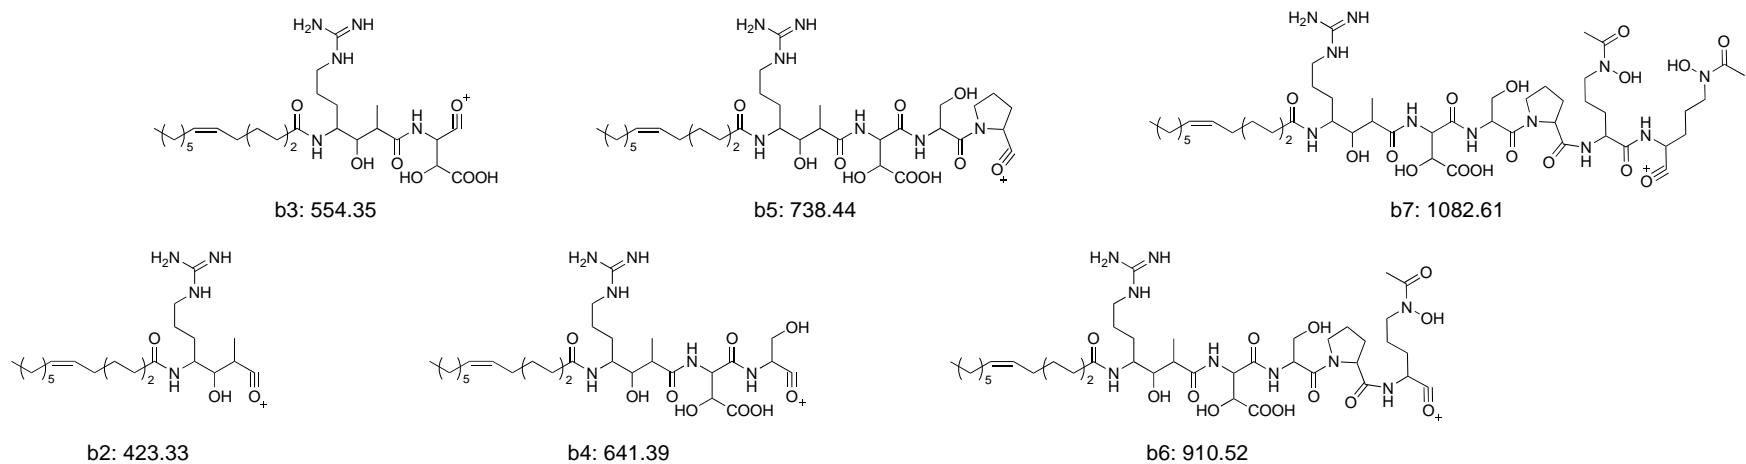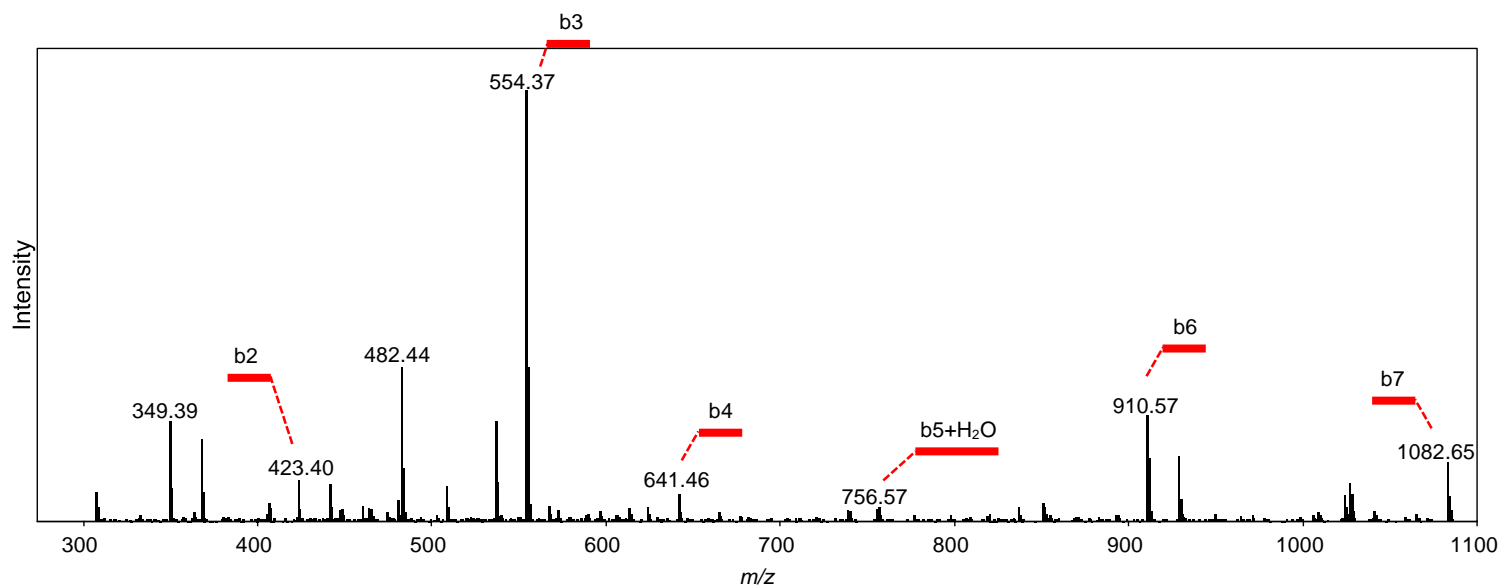

**Figure S34.** ESIMS/MS analysis of variochelin E (**5**). Structures and  $m/z$  of predicted fragmentation ions were described the top. An ion peak of  $[M + H]^+$  at  $m/z$  1101.14 was chosen as a parent ion.

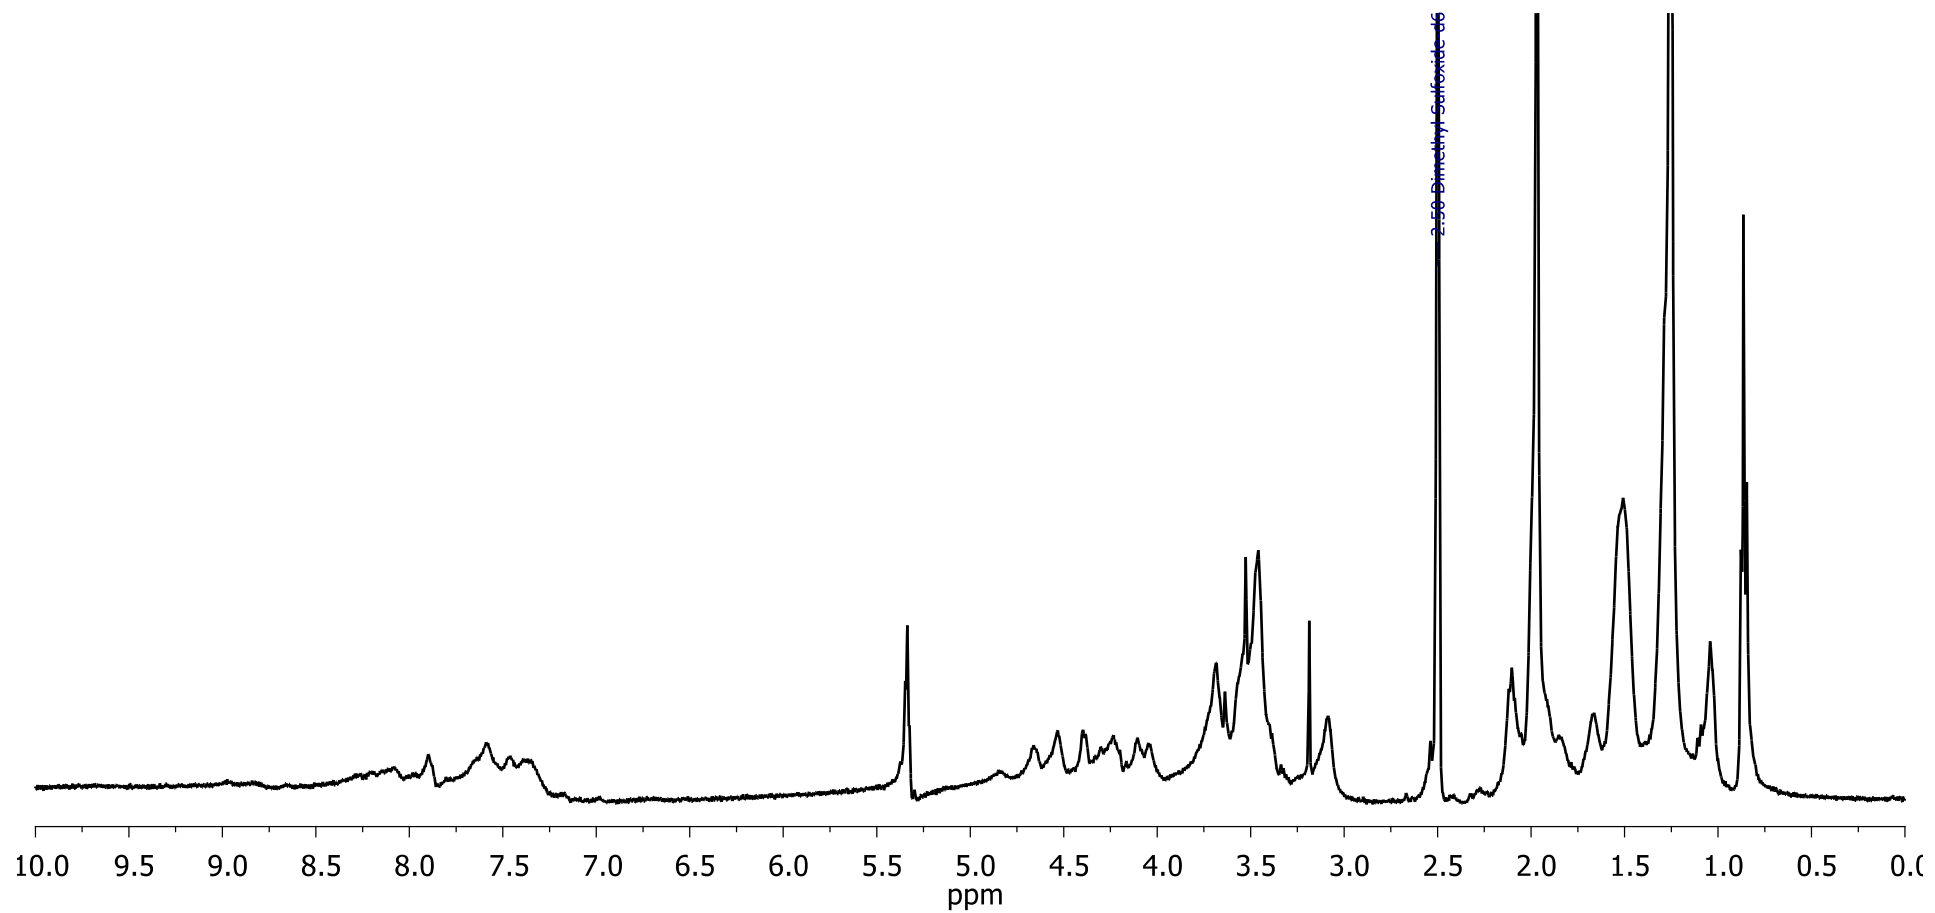

**Figure S35.**  $^1\text{H}$  NMR spectrum of variochelin E (**5**) (500 MHz,  $\text{DMSO-}d_6$ ).

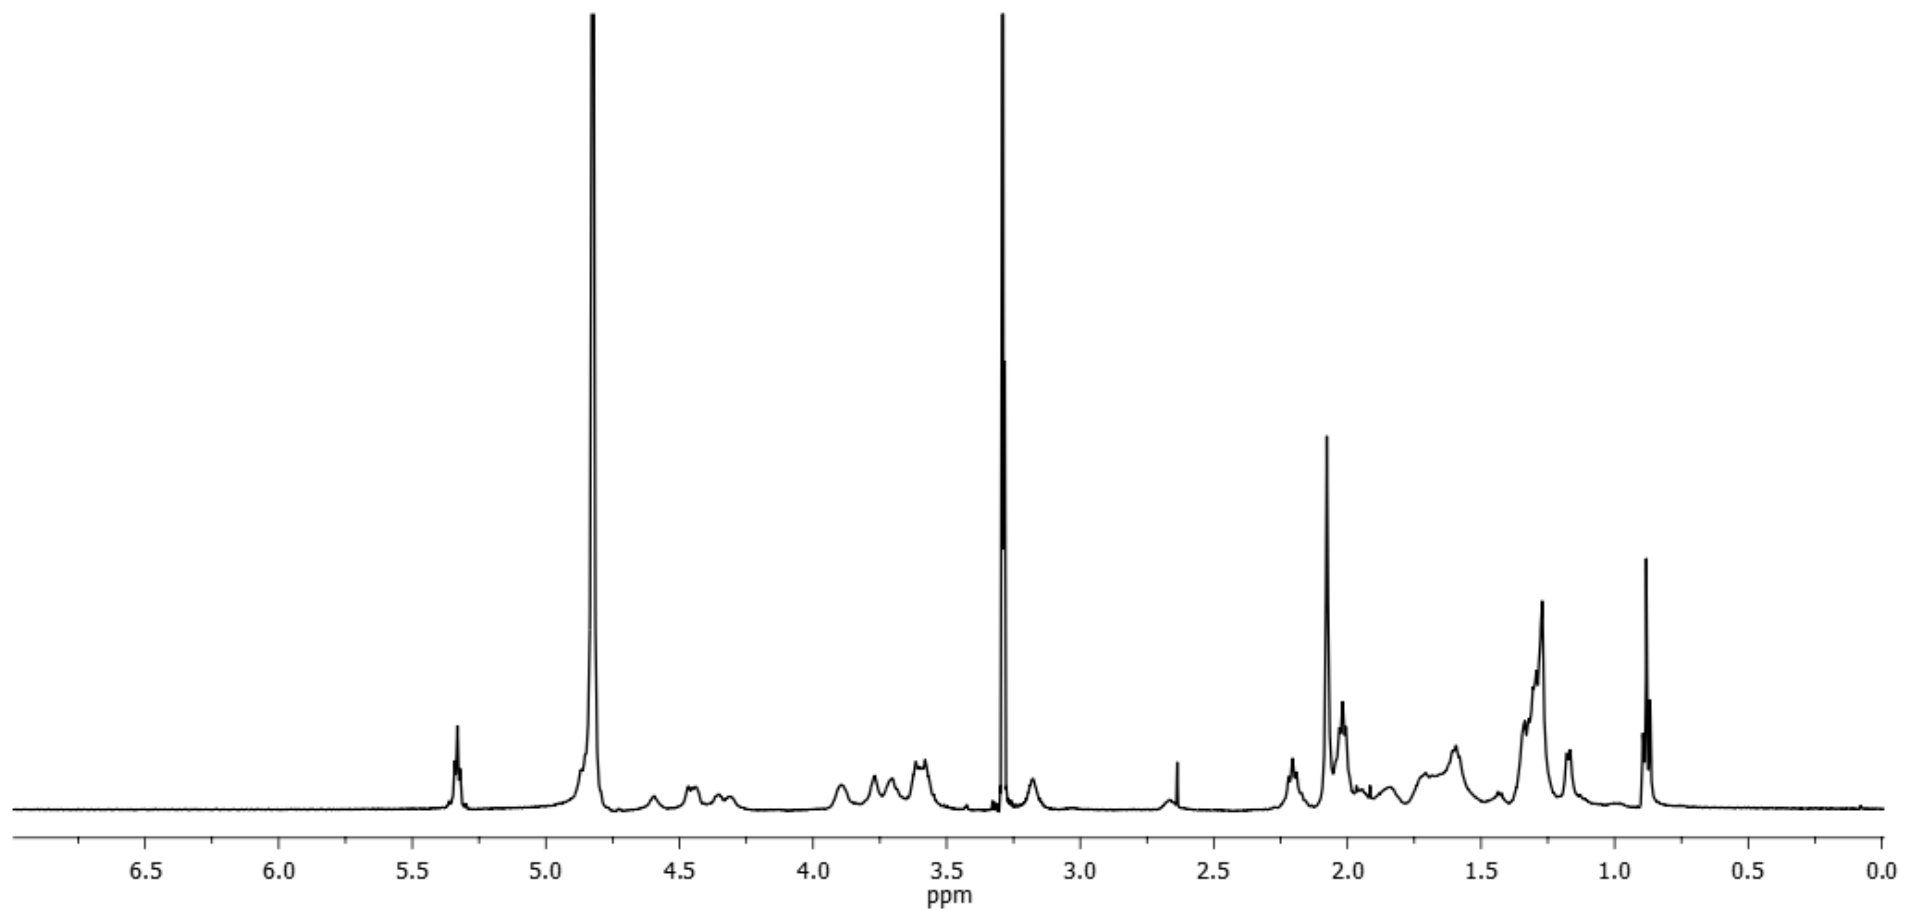

**Figure S36.**  $^1\text{H}$  NMR spectrum of variochelin E (**5**). (500 MHz, methanol- $d_4$ ).

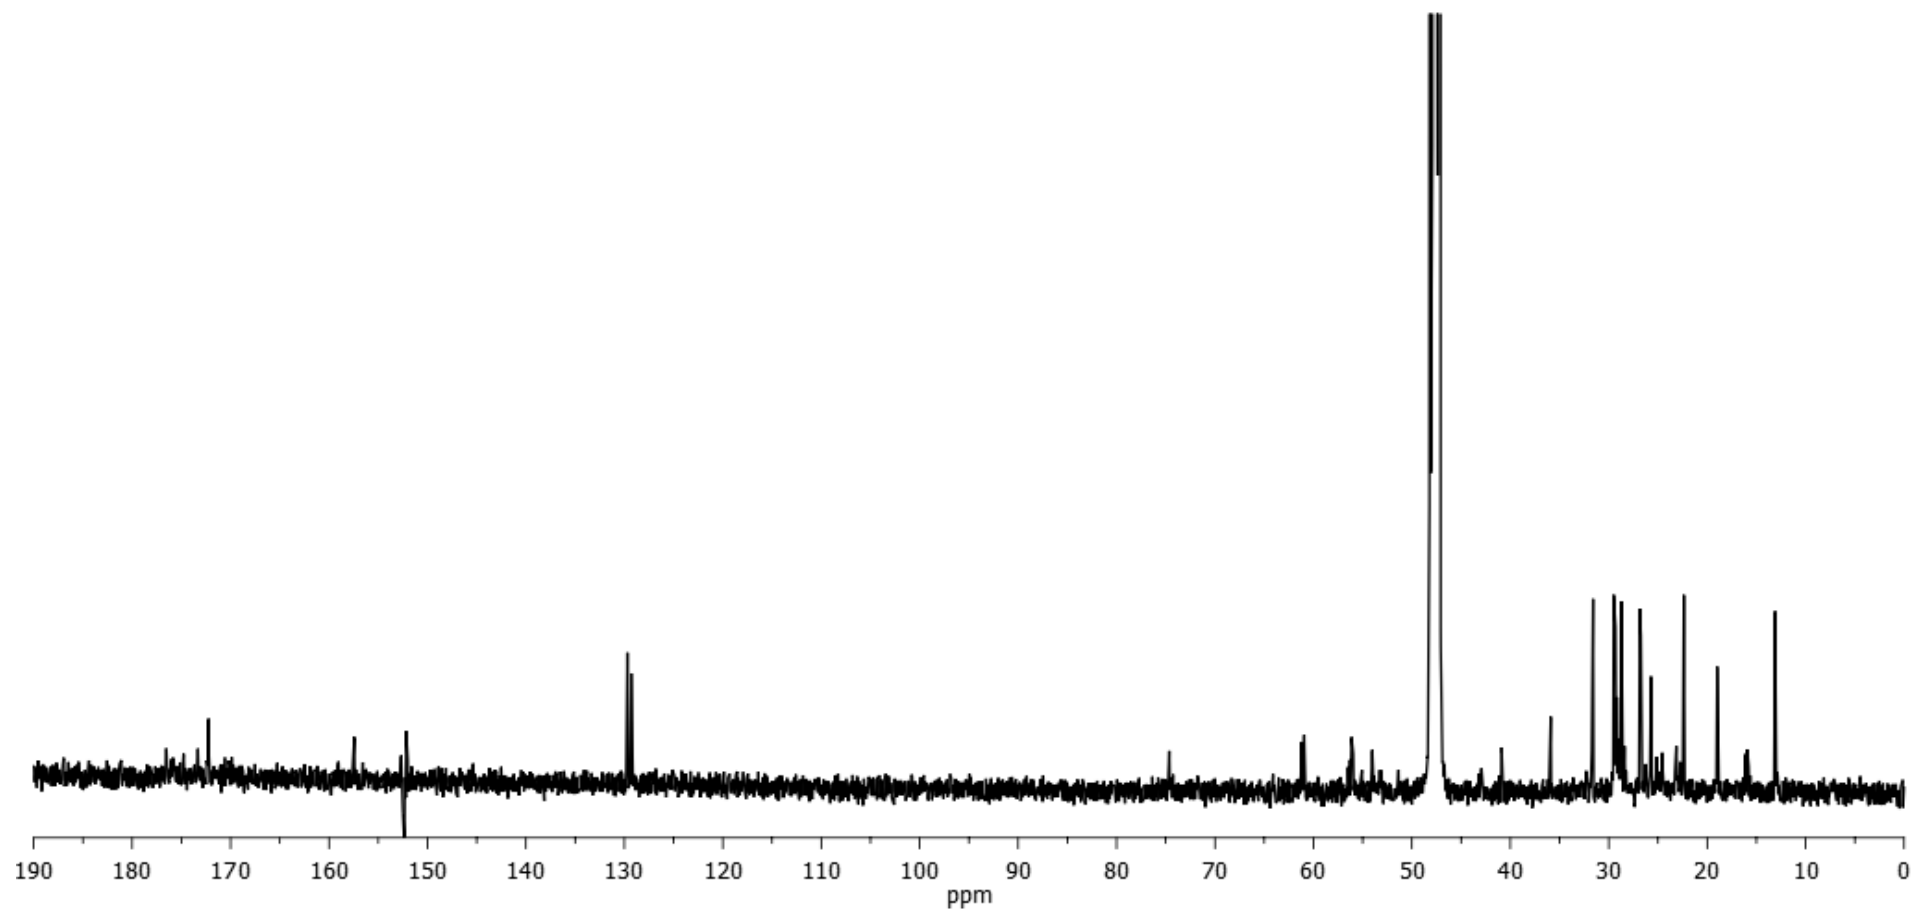

**Figure S37.**  $^{13}\text{C}$  NMR spectrum of variochelin E (**5**). (125 MHz,  $\text{CD}_3\text{OD}$ ).



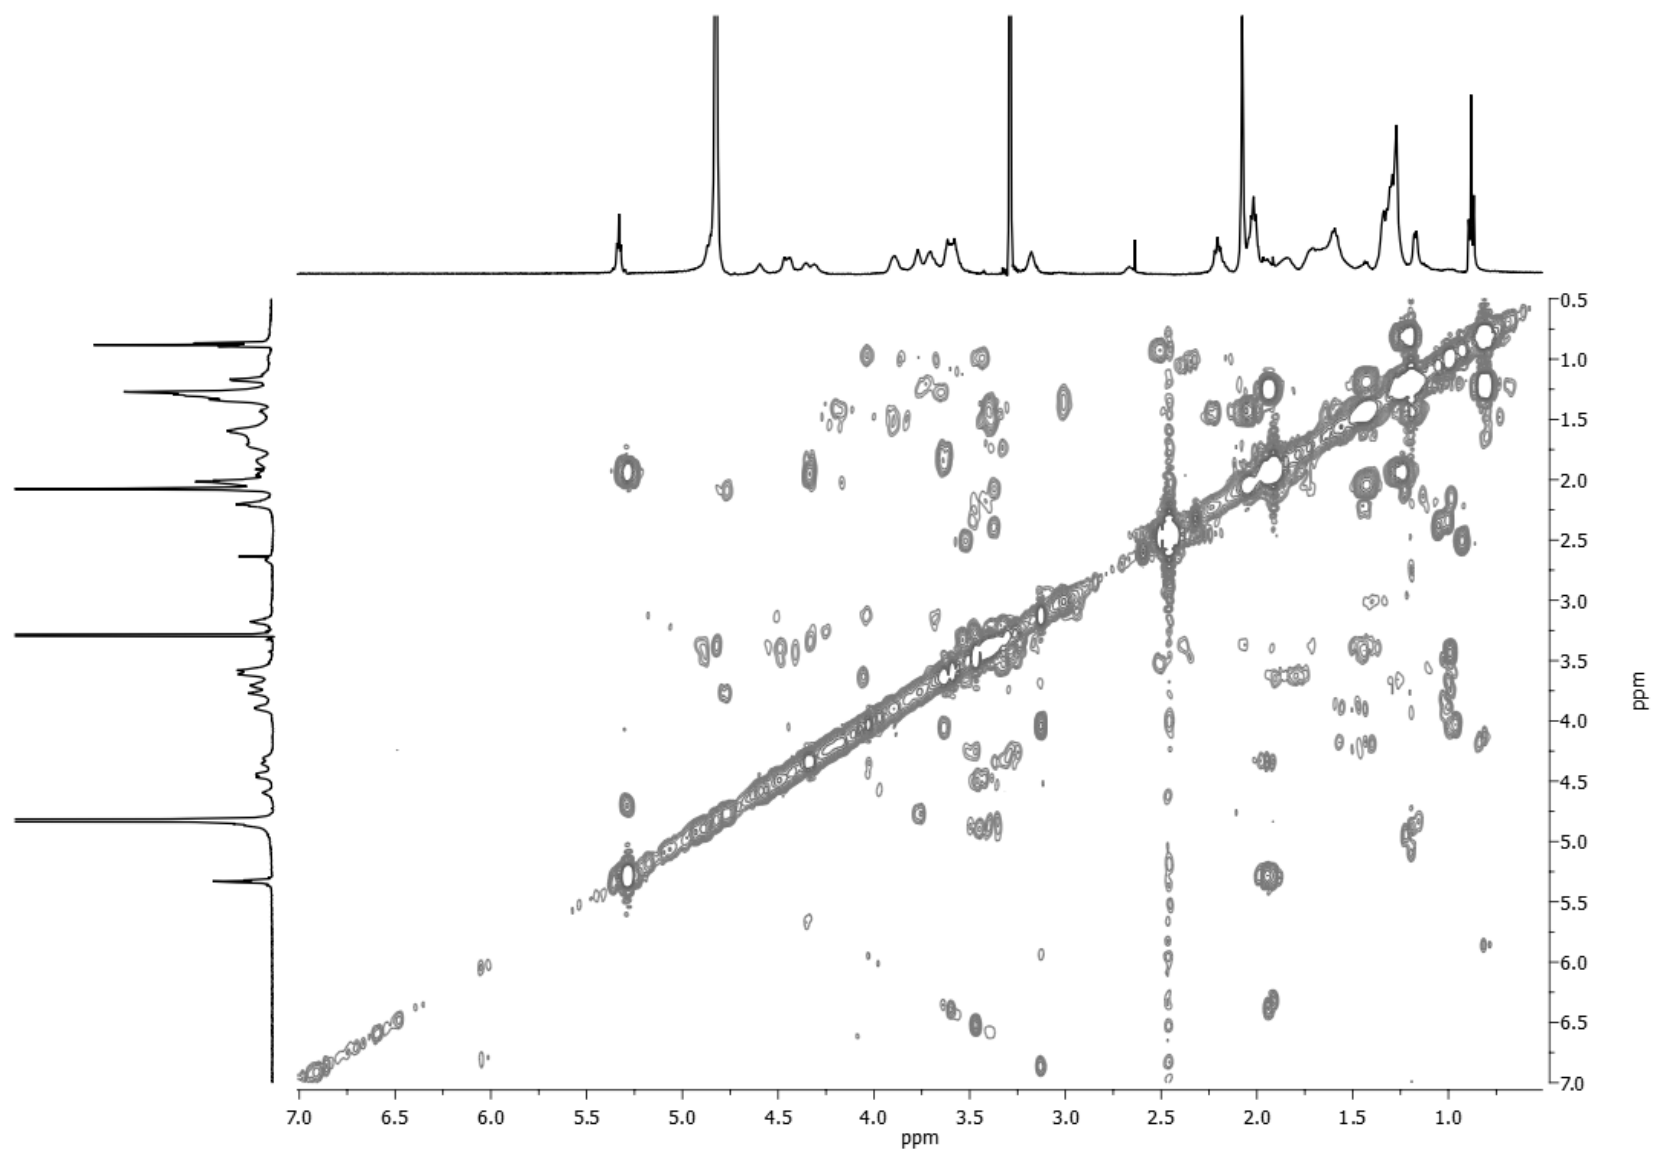

**Figure S38.** COSY spectrum of variochelin E (**5**). (500 MHz, methanol-*d*<sub>4</sub>).

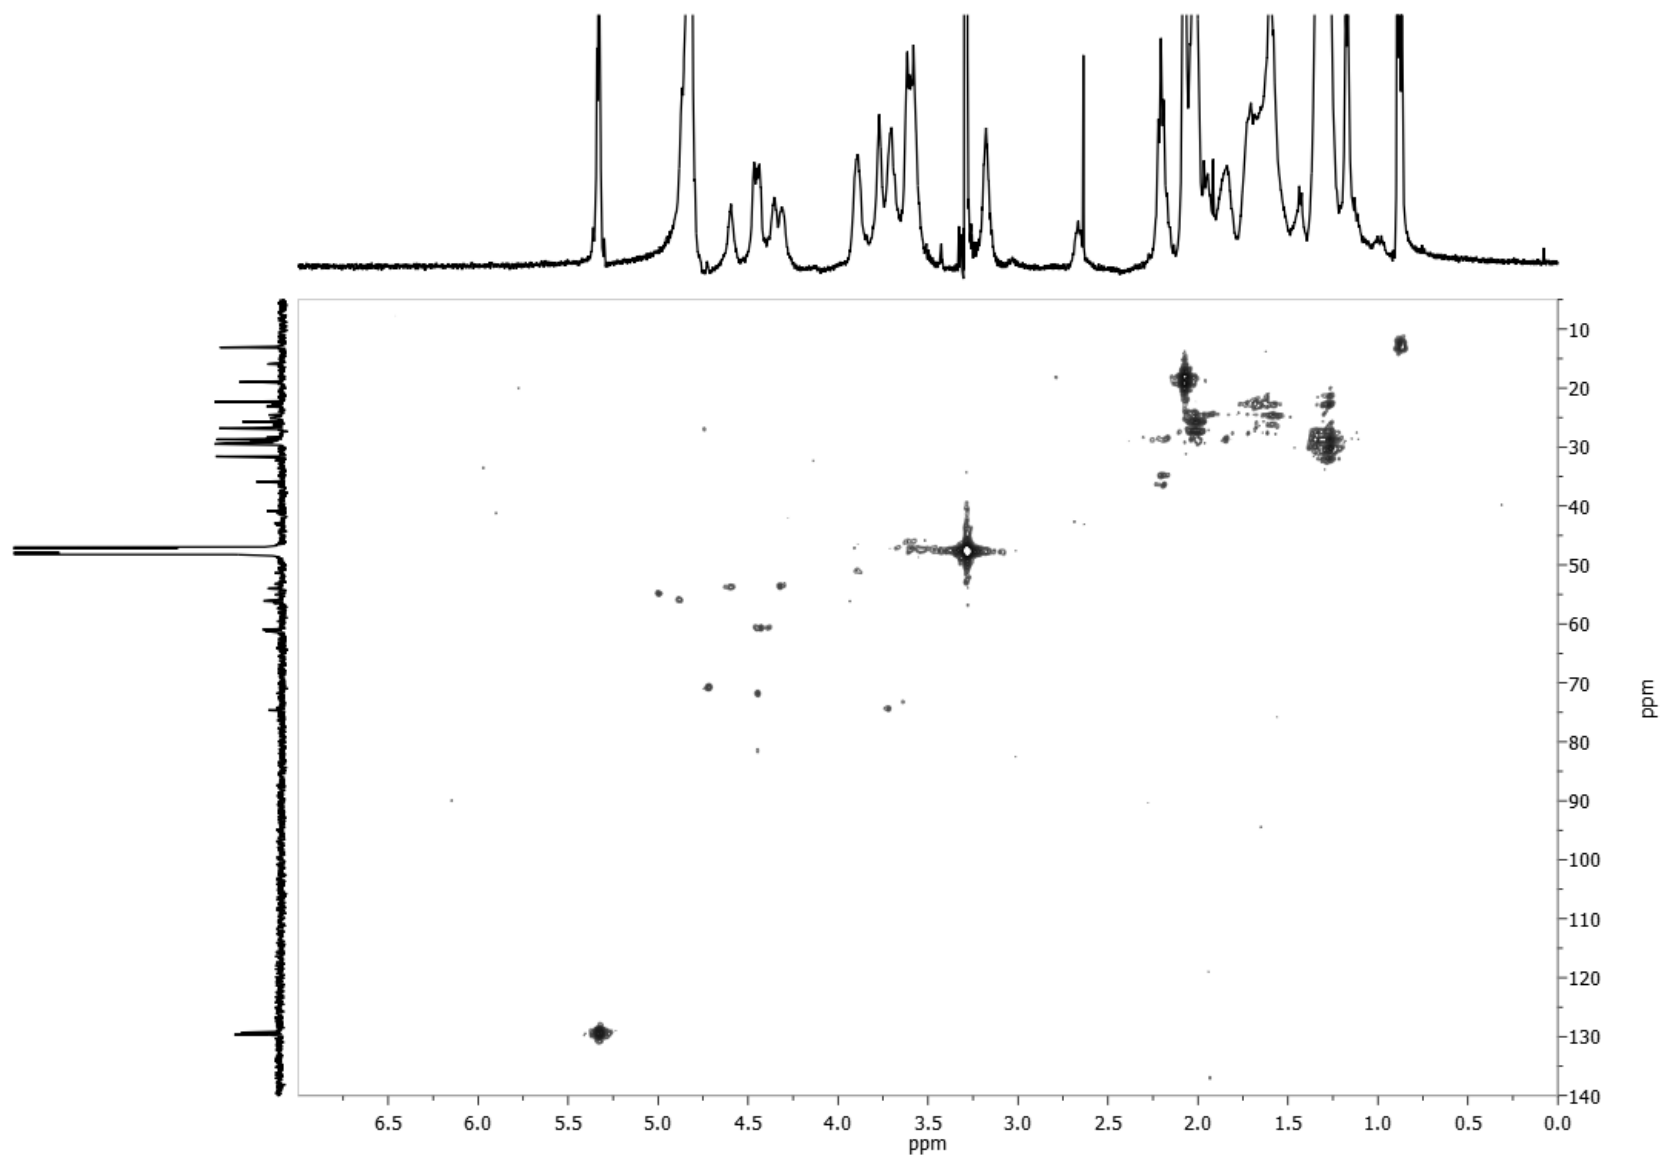

**Figure S39.** HSQC spectrum of variochelin E (**5**). (500 MHz, methanol- $d_4$ ).

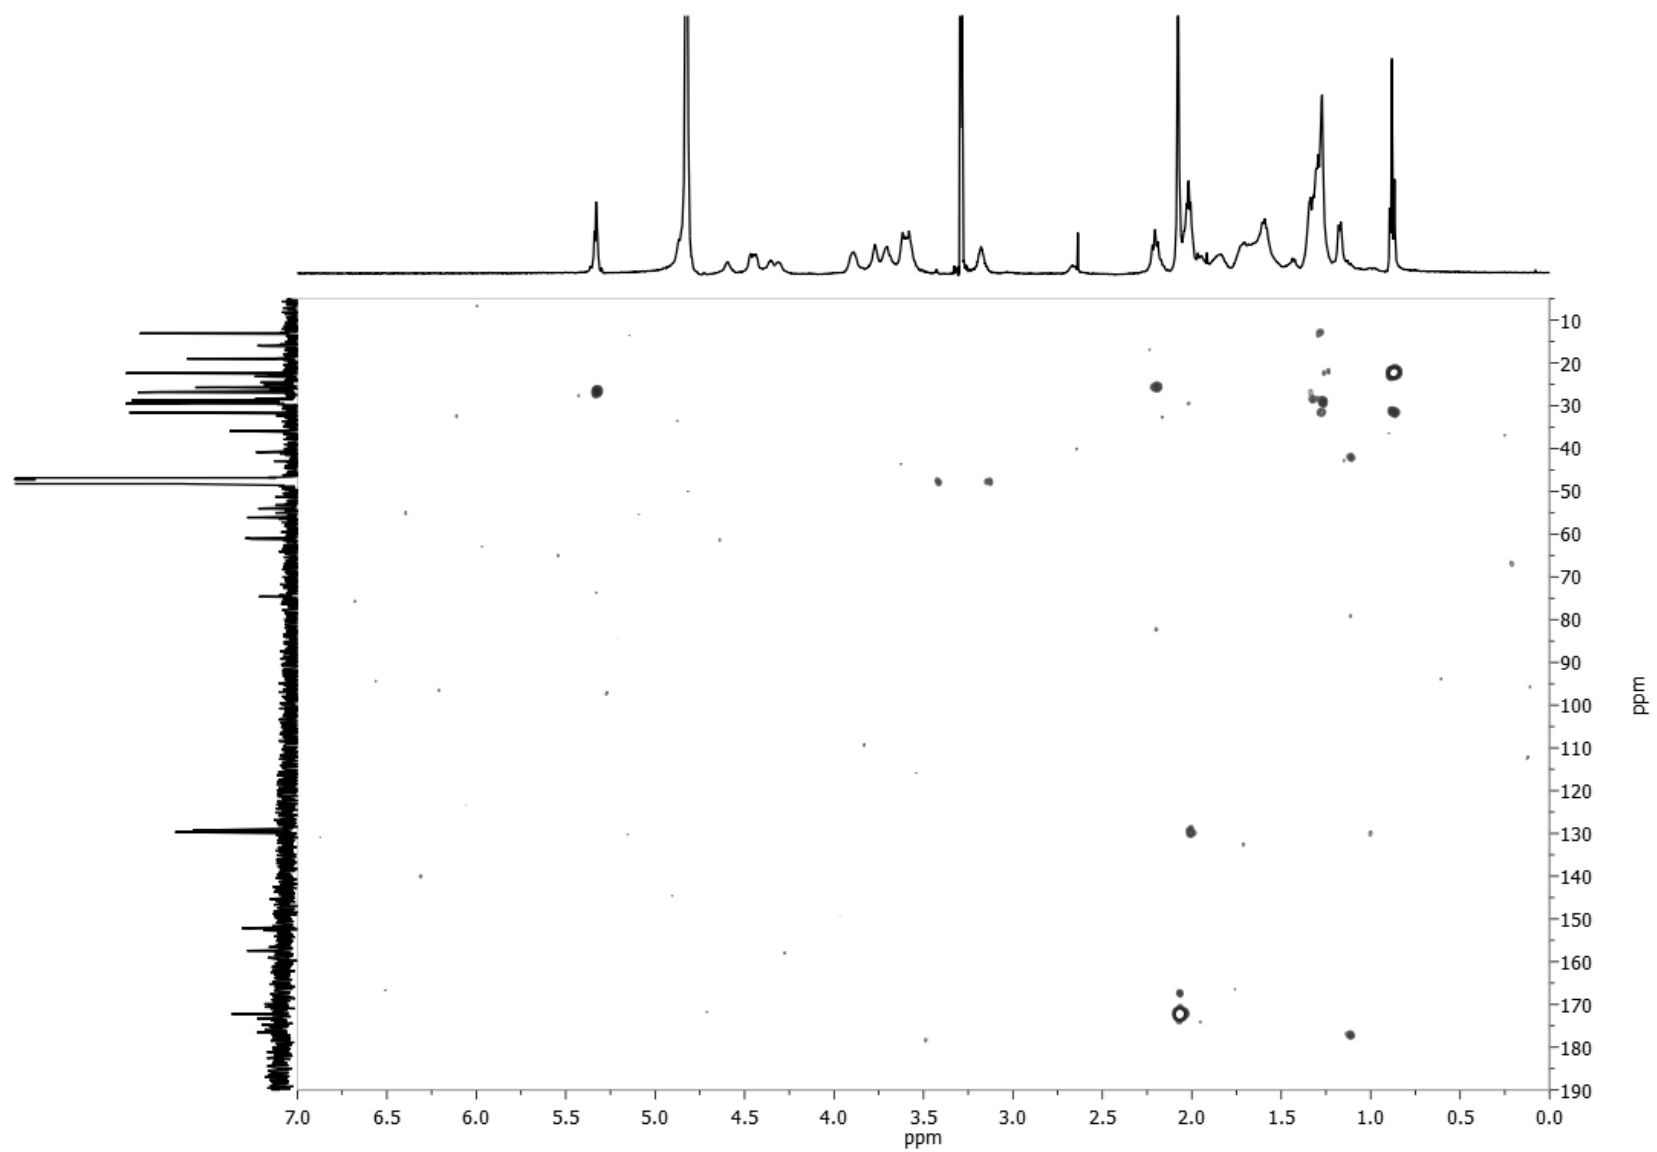

Figure S40. HMBC spectrum of variochelin E (5). (500 MHz, methanol-*d*<sub>4</sub>).

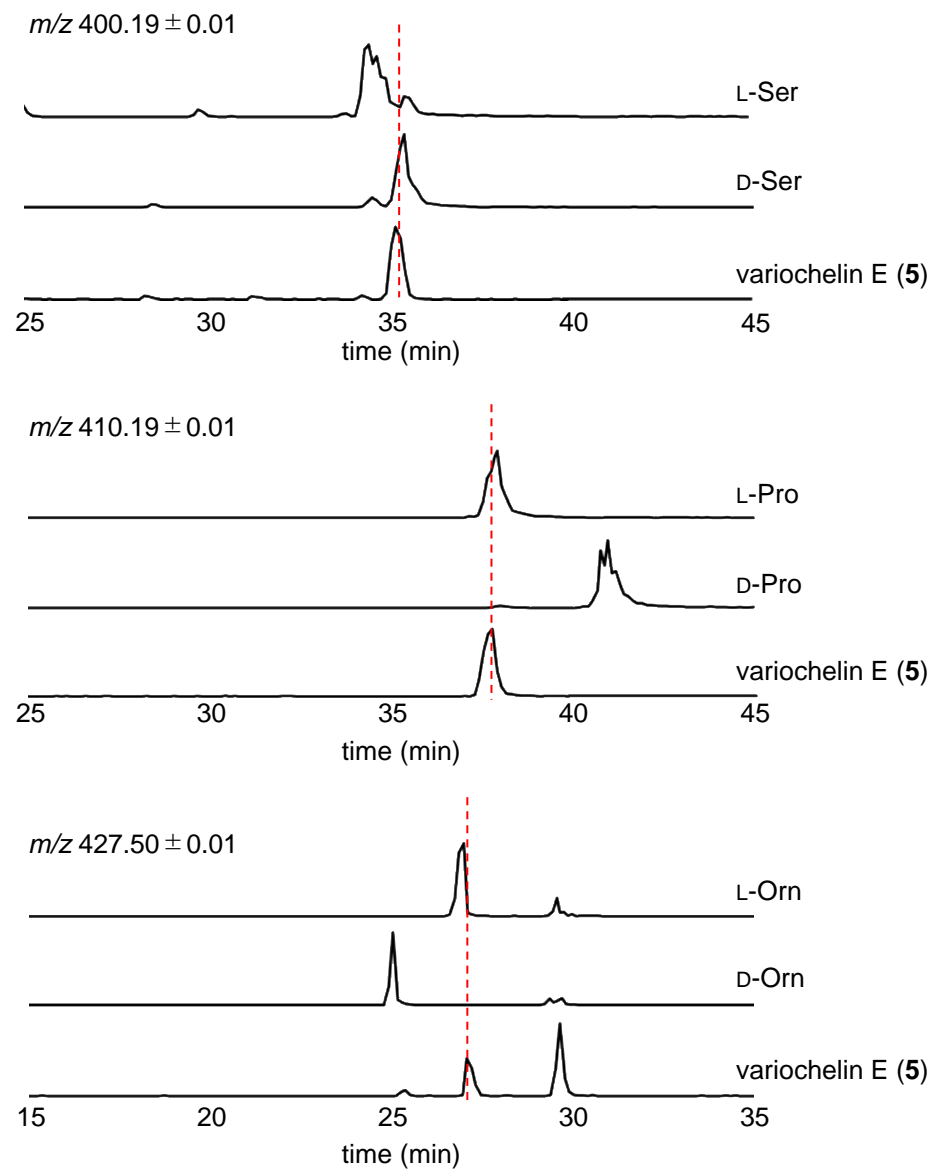

**Figure S41.** Extracted ion chromatograms from advanced Marfey's analyses of variochelin E (5).

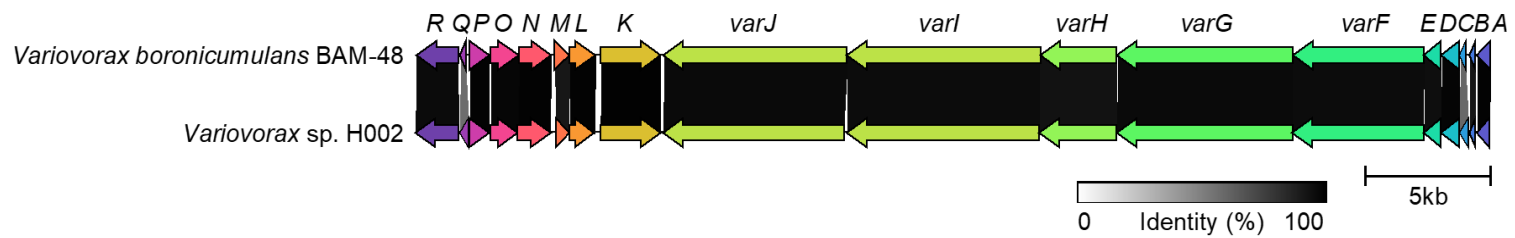

**Figure S42.** Variochelin BGCs comparison identified in *Variovorax boronicumulans* BAM-48 (up) and *Variovorax* sp. H002 (bottom) generated by clinker. Links between homologous genes are shown according to the percentage identity (see identity scale bar).

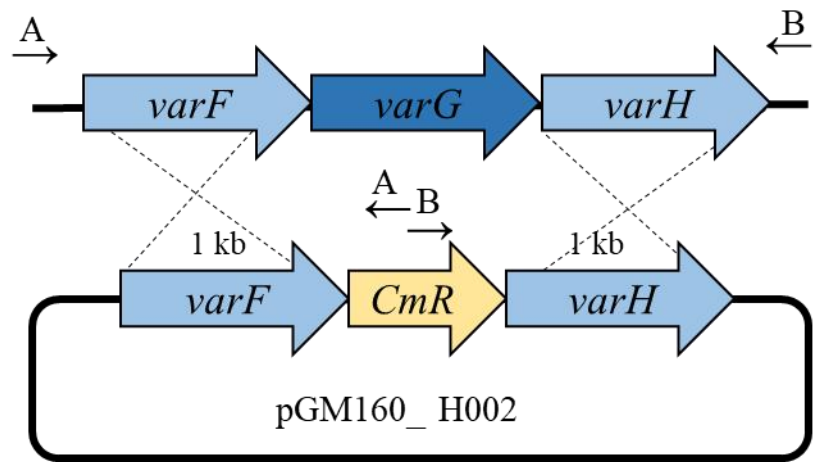

(A)

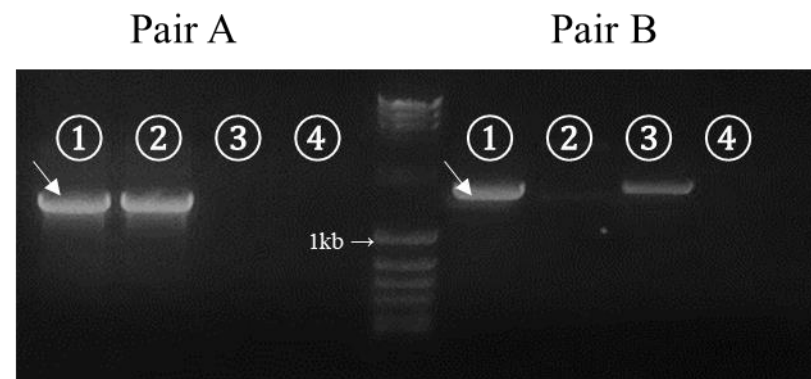

(B)

**Figure S43.** Generation of *Variovorax* sp. H002 *varG* null-mutant; (a) Illustration of *varG* knock-out using homolog recombination technology; dark blue-colored arrow is target gene to be replaced by yellow-colored chloramphenicol resistant gene (*cmR*) embedded in plasmid pGM160\_H002; light blue-colored arrows are homologous flanking genes; small black arrows, pair A and pair B, represent primer sites employed for confirmation of successful recombination. (b) Confirmation of successful recombination in four selected mutants; PCR amplification followed by visualization on 1% Agarose S gel showed mutant number 1 generated positive band (white arrows) in both primers pair A and B, while other mutants only give one band of either primers (number 2 and 3) or no band detected (number 4). The mutant number 1 is used for further experiments.

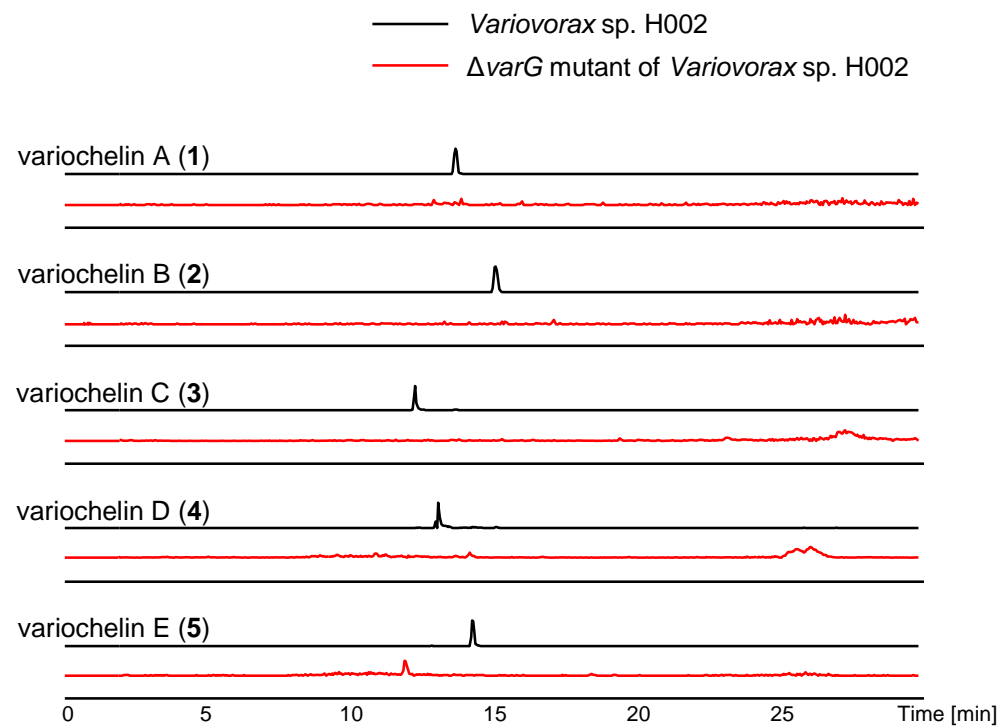

**Figure S44.** Extracted ion chromatogram showing deletion of *varG* abolishes variochelin A–E (1–5) production in *Variovorax* sp. H002. LC–MS-monitored production of variochelin A ( $m/z$  1074.59 [M + H]<sup>+</sup>), variochelin B ( $m/z$  1102.62 [M + H]<sup>+</sup>), variochelin C ( $m/z$  1046.56 [M + H]<sup>+</sup>), variochelin E ( $m/z$  1072.58 [M + H]<sup>+</sup>), and xenomicin E ( $m/z$  1100.61 [M + H]<sup>+</sup>).

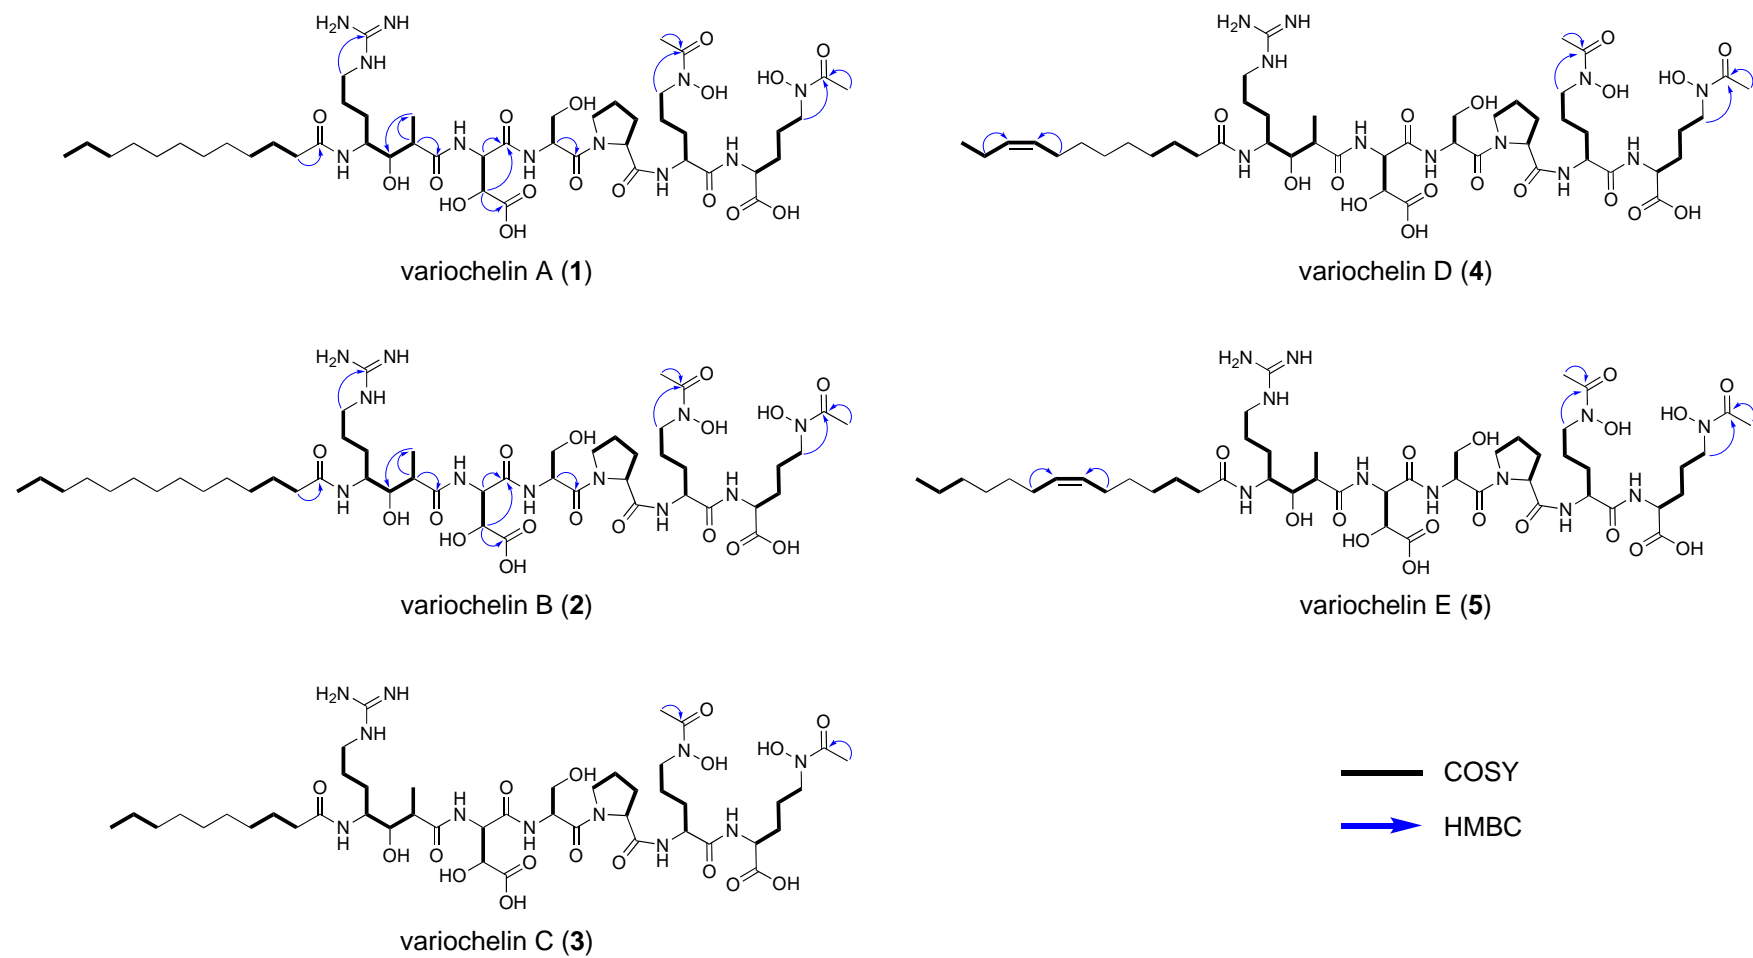

**Figure S45.** Selected COSY and HMBC correlations of variochelin A–E (1–5) in methanol- $d_4$ .



**Table S1.**  $^1\text{H}$  (500 MHz) and  $^{13}\text{C}$  (125 MHz) NMR data of variochelins A–E (**1–5**) in methanol- $d_4$  ( $\delta$  in ppm).

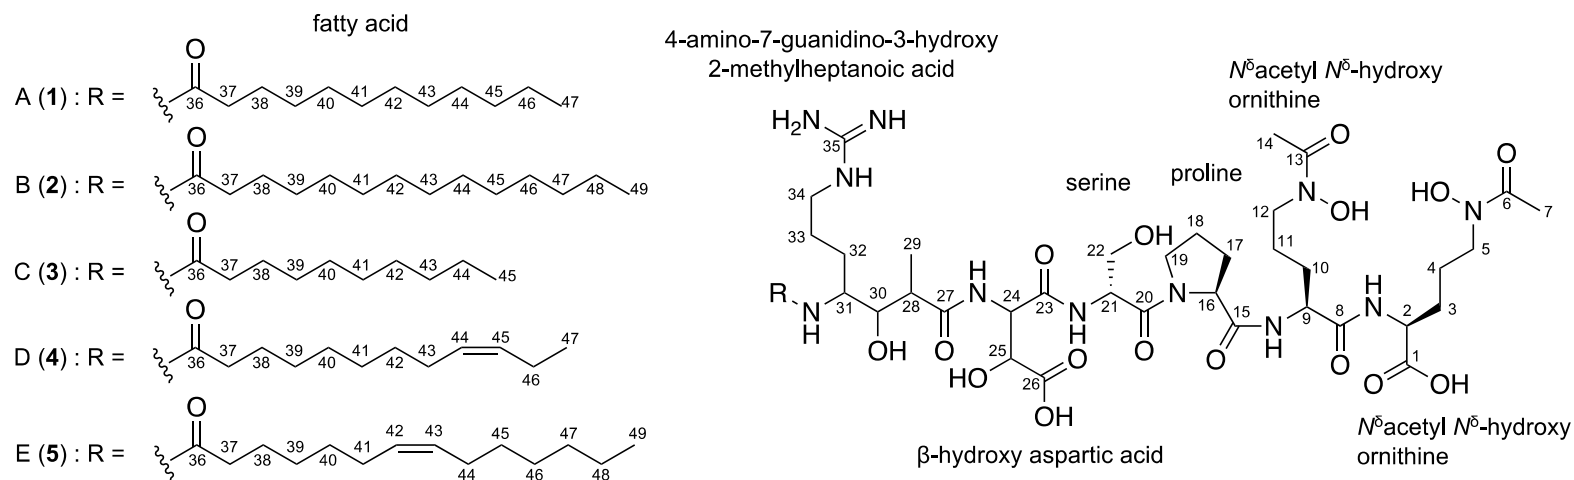

| Pos                                    | variochelin A ( <b>1</b> )        |                     | variochelin B ( <b>2</b> )        |                     | variochelin C ( <b>3</b> )        |                     | variochelin D ( <b>4</b> )        |                     | variochelin E ( <b>5</b> )        |                     |
|----------------------------------------|-----------------------------------|---------------------|-----------------------------------|---------------------|-----------------------------------|---------------------|-----------------------------------|---------------------|-----------------------------------|---------------------|
|                                        | $\delta_{\text{H}}$ , M (J in Hz) | $\delta_{\text{C}}$ | $\delta_{\text{H}}$ , M (J in Hz) | $\delta_{\text{C}}$ | $\delta_{\text{H}}$ , M (J in Hz) | $\delta_{\text{C}}$ | $\delta_{\text{H}}$ , M (J in Hz) | $\delta_{\text{C}}$ | $\delta_{\text{H}}$ , M (J in Hz) | $\delta_{\text{C}}$ |
| $N^6$ -acetyl $N^6$ -hydroxy ornithine |                                   |                     |                                   |                     |                                   |                     |                                   |                     |                                   |                     |
| 1                                      |                                   | n.r.                |                                   | n.r.                |                                   | n.r.                |                                   | n.r.                |                                   | n.r.                |
| 2                                      | 4.33 (m)                          | 55.2                | 4.33 (m)                          | 55.1                | 4.33 (m)                          | 55.3                | 4.32 (m)                          | 55.3                | 4.34 (m)                          | 55.1                |
| 3                                      | 1.72-1.88 (br)                    | 29.6                | 1.64-1.86 (br)                    | 29.7                | 1.70-1.88 (br)                    | 29.7                | 1.66-1.85 (br)                    | 29.7                | 1.66-1.85 (br)                    | 29.6                |
| 4                                      | 1.59-1.71 (br)                    | 25.9                | 1.59-1.71 (br)                    | 25.9                | 1.59-1.71 (br)                    | 25.9                | 1.62 (br)                         | 25.9                | 1.62 (br)                         | 25.7                |
| 5                                      | 3.71 (br)                         | 48.9*               | 3.73 (br)                         | 48.9*               | 3.59 (br)                         | 48.4*               | 3.59 (br)                         | 48.4*               | 3.59 (br)                         | 48.4*               |
| 6                                      |                                   | 173.6               |                                   | 173.7               |                                   | n.r.                |                                   | 173.6               |                                   | 173.6               |
| 7                                      | 2.09 (s)                          | 20.3                | 2.09 (s)                          | 20.3                | 2.09 (s)                          | 20.1                | 2.10 (s)                          | 20.5                | 2.10 (s)                          | 20.3                |
| $N^6$ -acetyl $N^6$ -hydroxy ornithine |                                   |                     |                                   |                     |                                   |                     |                                   |                     |                                   |                     |
| 8                                      |                                   | n.r.                |                                   | n.r.                |                                   | n.r.                |                                   | n.r.                |                                   | n.r.                |

|                                            |    |                            |       |                            |       |                           |       |                           |       |                           |       |
|--------------------------------------------|----|----------------------------|-------|----------------------------|-------|---------------------------|-------|---------------------------|-------|---------------------------|-------|
|                                            | 9  | 4.39 (m)                   | 54.4  | 4.39 (m)                   | 54.5  | 4.36 (m)                  | 55.1  | 4.36 (m)                  | 55.1  | 4.38 (m)                  | 55.1  |
|                                            | 10 | 1.72-1.88<br>(br)          | 29.6  | 1.64-1.86<br>(br)          | 29.7  | 1.70-1.88<br>(br)         | 29.7  | 1.66-1.85<br>(br)         | 29.7  | 1.66-1.85<br>(br)         | 29.6  |
|                                            | 11 | 1.53-1.81<br>(br)          | 25.9  | 1.52-1.71<br>(br)          | 25.9  | 1.65 (br)                 | 25.9  | 1.65 (br)                 | 25.9  | 1.65 (br)                 | 25.7  |
|                                            | 12 | 3.61 (br)                  | 48.4* | 3.61 (br)                  | 48.4* | 3.60 (br)                 | 48.4* | 3.60 (br)                 | 48.4* | 3.60 (br)                 | 48.4* |
|                                            | 13 |                            | 173.6 |                            | 173.5 |                           | n.r.  |                           | 173.6 |                           | 173.6 |
|                                            | 14 | 2.09 (s)                   | 20.3  | 2.09 (s)                   | 20.3  | 2.09 (s)                  | 20.1  |                           | 20.5  | 2.10 (s)                  | 20.3  |
| Proline (Pro)                              | 15 |                            | n.r.  |                            | n.r.  |                           | n.r.  |                           | n.r.  |                           | n.r.  |
|                                            | 16 | 4.46 (m)                   | 62.3  | 4.46 (m)                   | 62.3  | 4.47 (m)                  | 62.0  | 4.46 (m)                  | 62.1  | 4.46 (m)                  | 62.1  |
|                                            | 17 | a. 2.22 (m)<br>b. 2.06 (m) | 30.1  | a. 2.23 (m)<br>b. 2.07 (m) | 30.2  | a. 2.22(m)<br>b. 2.06 (m) | 30.2  | a. 2.20(m)<br>b. 2.04 (m) | 30.2  | a. 2.20(m)<br>b. 2.04 (m) | 30.1  |
|                                            | 18 | 1.62 br                    | 26.4  | 1.62 br                    | 26.4  | 1.61 (br)                 | 26.5  | 1.61 (br)                 | 26.5  | 1.61 (br)                 | 26.6  |
|                                            | 19 | 3.61 (br)                  | 48.7* | 3.62 (br)                  | 48.7* | 3.60 (br)                 | 48.4* | 3.59 (br)                 | 48.4* | 3.59 (br)                 | 48.4* |
| Serine (Ser)                               | 20 |                            | 171.2 |                            | 171.2 |                           | n.r.  |                           | n.r.  |                           | n.r.  |
|                                            | 21 | 4.61 (m)                   | 55.3  | 4.62 (m)                   | 55.3  | 4.64 (m)                  | 55.0  | 4.60 (m)                  | 55.0  | 4.62 (m)                  | 55.2  |
|                                            | 22 | 3.79 (m)                   | 62.5  | 3.79 (m)                   | 62.5  | 3.78 (m)                  | 63.4  | 3.78 (m)                  | 62.6  | 3.79 (m)                  | 64.5  |
| $\beta$ -hydroxy<br>aspartic acid<br>(Hya) | 23 |                            | 171.8 |                            | 171.9 |                           | n.r.  |                           | n.r.  |                           | n.r.  |
|                                            | 24 | 4.89 (br)                  | 57.4  | 4.89 (br)                  | 57.4  | 4.90 (m)                  | 57.2  | 4.91 (m)                  | 57.5  | 4.91 (m)                  | 57.3  |
|                                            | 25 | 4.49 (br)                  | 72.9  | 4.49 (br)                  | 73.0  | 4.44 (m)                  | 73.4  | 4.46 (m)                  | 73.1  | 4.49 (m)                  | 73.2  |
|                                            | 26 |                            | 177.3 |                            | 177.3 |                           | n.r.  |                           | n.r.  |                           | n.r.  |
| 4-amino-7-<br>guanidino<br>-3-hydroxy      | 27 |                            | 177.8 |                            | 177.8 |                           | n.r.  |                           | n.r.  |                           | n.r.  |

2-  
methylheptano  
ic acid

|            |               |           |               |           |                |           |                |           |                |           |
|------------|---------------|-----------|---------------|-----------|----------------|-----------|----------------|-----------|----------------|-----------|
| 28         | 2.69 (m)      | 44.3      | 2.67 (m)      | 44.3      | 2.70 (m)       | 43.9      | 2.69 (m)       | 44.1      | 2.69 (m)       | 44.5      |
| 29         | 1.19 (d, 6.8) | 14.4      | 1.20 (d, 6.8) | 14.4      | 1.18 (d, 6.4)  | n.r.      | 1.17 (br)      | 14.4      | 1.2 (br)       | n.r.      |
| 30         | 3.72 (m)      | 75.9      | 3.74 (m)      | 75.9      | 3.78 (m)       | 75.7      | 3.72 (m)       | 75.7      | 3.73 (m)       | 75.8      |
| 31         | 3.92 (m)      | 52.6      | 3.92 (m)      | 52.6      | 3.90 (m)       | 52.6      | 3.89 (m)       | 52.6      | 3.91 (m)       | 52.5      |
| 32         | a. 1.45 (m)   | 29.8      | a. 1.46 (m)   | 29.8      | 1.48-1.54 (br) | 29.8      | 1.44-1.97 (br) | 29.8      | 1.44-1.97 (br) | 29.8      |
|            | b. 1.71 (m)   |           | b. 1.71 (m)   |           |                |           |                |           |                |           |
| 33         | 1.61 (m)      | 24.1      | 1.61 (m)      | 24.1      | 1.54-1.70 (br) | 24.2      | 1.58 (br)      | 24.2      | 1.58 (br)      | 24.2      |
| 34         | 3.19 (m)      | 42.2      | 3.19 (m)      | 42.2      | 3.20 (m)       | 42.1      | 3.21 (m)       | 42.5      | 3.21 (m)       | 41.9      |
| 35         |               | 158.7     |               | 158.7     |                | n.r.      |                | n.r.      |                | n.r.      |
| fatty acid |               | 176.1     |               | 176.4     |                | n.r.      |                | n.r.      |                | n.r.      |
| 36         |               | 176.1     |               | 176.4     |                | n.r.      |                | n.r.      |                | n.r.      |
| 37         | 2.22 (m)      | 37.2      | 2.22 (m)      | 37.2      | 2.22 (m)       | 37.1      | 2.20 (m)       | 37.3      | 2.23 (m)       | 37.2      |
| 38         | 1.62 (br)     | 23.7      | 1.61 (br)     | 23.7      | 1.62 (br)      | 24.1      | 1.61 (br)      | 24.1      | 1.61 (br)      | 24.3      |
| 39         | 1.33 (br)     | 29.7-30.8 | 1.31 (br)     | 29.8-30.7 | 1.32 (br)      | 29.7-30.8 | 1.33 (br)      | 30.0-30.8 | 1.29 (br)      | 29.7-30.8 |
| 40         | 1.33 (br)     | 29.7-30.8 | 1.31 (br)     | 29.8-30.7 | 1.32 (br)      | 29.7-30.8 | 1.33 (br)      | 30.0-30.8 | 1.29 (br)      | 29.7-30.8 |
| 41         | 1.33 (br)     | 29.7-30.8 | 1.31 (br)     | 29.8-30.7 | 1.32 (br)      | 29.7-30.8 | 1.33 (br)      | 30.0-30.8 | 2.04 (br)      | 28.1      |
| 42         | 1.33 (br)     | 29.7-30.8 | 1.31 (br)     | 29.8-30.7 | 1.32 (br)      | 29.7-30.8 | 1.33 (br)      | 30.0-30.8 | 5.35 (m, 4.6)  | 131.1     |
| 43         | 1.33 (br)     | 29.7-30.8 | 1.31 (br)     | 29.8-30.7 | 1.32 (br)      | 29.7-30.8 | 2.04 (br)      | 28.1      | 5.35 (m, 4.6)  | 130.6     |
| 44         | 1.33 (br)     | 29.7-30.8 | 1.31 (br)     | 29.8-30.7 | 1.32 (br)      | 29.7-30.8 | 5.35 (m, 4.6)  | 131.1     | 2.04 (br)      | 28.1      |

|    |               |           |               |           |               |      |               |       |               |           |
|----|---------------|-----------|---------------|-----------|---------------|------|---------------|-------|---------------|-----------|
| 45 | 1.33 (br)     | 29.7-30.8 | 1.31 (br)     | 29.8-30.7 | 0.90 (t, 6.9) | 14.1 | 5.35 (m, 4.6) | 130.6 | 1.29 (br)     | 29.7-30.8 |
| 46 | 1.33 (br)     | 29.7-30.8 | 1.31 (br)     | 29.8-30.7 |               |      | 2.04 (br)     | 28.1  | 1.29 (br)     | 29.7-30.8 |
| 47 | 0.90 (t, 7.0) | 14.4      | 1.31 (br)     | 29.8-30.7 |               |      | 0.90 (t, 6.9) | 14.1  | 1.29 (br)     | 29.7-30.8 |
| 48 |               |           | 1.31 (br)     | 29.8-30.7 |               |      |               |       | 1.29 (br)     | 29.7-30.8 |
| 49 |               |           | 0.90 (t, 7.0) | 14.4      |               |      |               |       | 0.90 (t, 6.9) | 14.4      |

n.r. (not resolved due to broadening signals)

\* assigned chemical shifts according to HSQC coupling

**Table S2.** List of primers, strains and plasmids used for generation of *varG* null-mutant.

| Primers                           | Sequence (5' → 3'):                                                                                                                                                                       |
|-----------------------------------|-------------------------------------------------------------------------------------------------------------------------------------------------------------------------------------------|
| varG-up_fw                        | gccaaaagtggcccagggcTCAGAGGGTTCTTTCCGTGGG                                                                                                                                                  |
| varG-up_rv                        | tcttctggcagataagcttCGTGAACGCCTACGGCCC                                                                                                                                                     |
| CmR_fw                            | CACCAATAACTGCCTTAAAAAATTACG                                                                                                                                                               |
| CmR_rv                            | GCCCTGGGCCAACTTTTG                                                                                                                                                                        |
| varG-down_fw                      | cggatgaatgggataagcttTGGGCGGCGCCTCGACGA                                                                                                                                                    |
| varG-down_rv                      | ttttaaggcagttattggtgATGACGACCATGACCGACCACTTCGAC                                                                                                                                           |
| H002_checkA_fw                    | TCCAGCAGGCAGAGGTATTG                                                                                                                                                                      |
| H002_checkA_rv                    | GCAAGATGTGGCGTGTTACG                                                                                                                                                                      |
| H002_checkB_fw                    | CACCAGCTCACCGTCTTTCA                                                                                                                                                                      |
| H002_checkB_rv                    | ACAGCTCAGTGAACGGAACC                                                                                                                                                                      |
| pRED_fw                           | ATCTGCCAGGAAGATACTTAAC                                                                                                                                                                    |
| pRED_rv                           | ATCCCATTCATCCGCTTATTATC                                                                                                                                                                   |
| Strains and plasmids              | Genotype or description                                                                                                                                                                   |
| <i>E. coli</i> DH5a               | F <sup>-</sup> φ80 <i>lacZ</i> ΔM15 Δ( <i>lacZYA-argF</i> ) U169 <i>endA1 recA1 hsdR17</i> (rk <sup>-</sup> , mk <sup>+</sup> ) <i>supE44 thi</i> <sup>-1</sup> <i>gyrA996 relA1 phoA</i> |
| <i>E. coli</i> S17-1 λ <i>pir</i> | λ <i>pir hsdR pro thi</i> ; chromosomal integrated RP4-2 Tc::Mu m::Tn7                                                                                                                    |
| <i>Variovorax</i> sp. H002        | Wild type                                                                                                                                                                                 |
| pRED                              | Cloning vector; Cm <sup>r</sup>                                                                                                                                                           |
| pGM160                            | Conjugation vector; Amp <sup>r</sup> , Tsr <sup>r</sup> , Neo <sup>r</sup> , Kan <sup>r</sup>                                                                                             |
| pRED_H002                         | H002 Knock-out cassette on pRED                                                                                                                                                           |
| pGM160_H002                       | H002 Knock-out cassette on pGM160                                                                                                                                                         |

**Table S3.** Annotation of *var* biosynthetic gene cluster in *Variovorax* sp. H002.

■ regulatory genes   
 ■ core BGC genes   
 ■ accessory BGC genes   
 ■ transport genes   
 ■ others

| ORF | Nucl. | AA   | Homolog                                 | Cov./Id. | Accession      |
|-----|-------|------|-----------------------------------------|----------|----------------|
| A   | 534   | 177  | RNA polymerase sigma factor             | 99/83.5  | WP_092757814.1 |
| B   | 246   | 81   | FecR/PupR family sigma factor regulator | 91/59.5  | WP_166300416.1 |
| C   | 249   | 82   | MbtH family                             | 98/82.7  | WP_211958485.1 |
| D   | 747   | 248  | Thioesterase                            | 92/70.4  | SDO97538.1     |
| E   | 702   | 233  | 4'-phosphopantetheinyl transferase      | 95/57.7  | WP_272548812.1 |
| F   | 5265  | 1754 | NRPS (FAAL-A-PCP)                       | -        | -              |
| G   | 7056  | 2351 | PKS (KS-AT-KR-ACP-C)                    | -        | -              |
| H   | 3105  | 1034 | NRPS (C-A-PCP)                          | -        | -              |
| I   | 7764  | 2587 | NRPS (C-A-PCP-E-C-A-PCP)                | -        | -              |
| J   | 7377  | 2458 | NRPS (C-A-PCP-C-A-PCP-TE)               | -        | -              |
| K   | 2448  | 815  | TonB-dependent siderophore receptor     | 96/60.3  | WP_198971676.1 |
| L   | 1029  | 342  | Iron dicitrate transport regulator FecR | 97/66.3  | WP_121454243.1 |
| M   | 579   | 192  | RNA polymerase sigma factor             | 99/78.4  | WP_092759873.1 |
| M   | 1320  | 439  | L-Ornithine N(5)-oxygenase              | 99/71.5  | ODT73388.1     |
| O   | 1107  | 368  | Acetyltransferase                       | 94/58.0  | WP_090907594.1 |
| P   | 786   | 261  | Siderophore-iron reductase              | 99/89.6  | RIX80240.1     |
| Q   | 234   | 77   | Hypothetical protein                    | 77/75.4  | WP_092759869.1 |
| R   | 1680  | 559  | Cyclic peptide export ABC transporter   | 98/74.73 | WP_211956633.1 |
